# Supplementary material for: Characterization of the potential reference material SA02 for micro-beam U–Pb geochronology and Hf–O isotopic composition analysis of zircon
Source: Royal Society of Chemistry journal article supplement (doi:10.1039/d0ja00409j), 2020-12-08
Supplement: d0ja00409j1.xlsx [file d0ja00409j1.xlsx]

## Sheet: PlotDat1
Source sheet	Big shard in IGGCAS	0.2822	0.0140294	0.282252	0	0.2822	0
Plot name	ProbDens1	0.2822	0.0144331	0.282256	0	0.28236	0
Plot Type	16	0.2822	0.0148479	0.282256	1
1st free col	9	0.2822	0.0152742	0.282252	1
Sigma Level	2	0.2822	0.0157122	0.282252	0
Absolute Errs	TRUE	0.2822	0.0161624	ErrBox	ErrBox
Symbol Type	1	0.2822	0.0166249	0.282256	0
Inverse Plot	FALSE	0.282201	0.0171002	0.28226	0
Color Plot	TRUE	0.282201	0.0175885	0.28226	2
3D plot	FALSE	0.282201	0.0180903	0.282256	2
Linear	FALSE	0.282201	0.0186058	0.282256	0
Data Range	N2:O85	0.282201	0.0191354	ErrBox	ErrBox
Filled Symbols	FALSE	0.282201	0.0196795	0.28226	0
ConcAge	FALSE	0.282201	0.0202385	0.282264	0
ConcSwap	FALSE	0.282201	0.0208127	0.282264	2
1st Symbol-row	1	0.282201	0.0214026	0.28226	2
		0.282201	0.0220086	0.28226	0
		0.282201	0.0226311	ErrBox	ErrBox
		0.282201	0.0232705	0.282264	0
		0.282202	0.0239273	0.282268	0
		0.282202	0.0246019	0.282268	6
		0.282202	0.0252948	0.282264	6
		0.282202	0.0260064	0.282264	0
		0.282202	0.0267373	ErrBox	ErrBox
		0.282202	0.027488	0.282268	0
		0.282202	0.0282589	0.282272	0
		0.282202	0.0290506	0.282272	5
		0.282202	0.0298636	0.282268	5
		0.282202	0.0306984	0.282268	0
		0.282202	0.0315558	ErrBox	ErrBox
		0.282202	0.0324361	0.282272	0
		0.282202	0.03334	0.282276	0
		0.282203	0.0342682	0.282276	4
		0.282203	0.0352212	0.282272	4
		0.282203	0.0361997	0.282272	0
		0.282203	0.0372043	ErrBox	ErrBox
		0.282203	0.0382357	0.282276	0
		0.282203	0.0392946	0.28228	0
		0.282203	0.0403817	0.28228	7
		0.282203	0.0414978	0.282276	7
		0.282203	0.0426434	0.282276	0
		0.282203	0.0438195	ErrBox	ErrBox
		0.282203	0.0450268	0.28228	0
		0.282203	0.046266	0.282284	0
		0.282204	0.047538	0.282284	4
		0.282204	0.0488436	0.28228	4
		0.282204	0.0501838	0.28228	0
		0.282204	0.0515592	ErrBox	ErrBox
		0.282204	0.052971	0.282284	0
		0.282204	0.0544198	0.282288	0
		0.282204	0.0559068	0.282288	7
		0.282204	0.0574329	0.282284	7
		0.282204	0.058999	0.282284	0
		0.282204	0.0606061	ErrBox	ErrBox
		0.282204	0.0622554	0.282288	0
		0.282204	0.0639478	0.282292	0
		0.282204	0.0656844	0.282292	8
		0.282205	0.0674664	0.282288	8
		0.282205	0.0692949	0.282288	0
		0.282205	0.071171	ErrBox	ErrBox
		0.282205	0.073096	0.282292	0
		0.282205	0.075071	0.282296	0
		0.282205	0.0770974	0.282296	6
		0.282205	0.0791763	0.282292	6
		0.282205	0.0813092	0.282292	0
		0.282205	0.0834973	ErrBox	ErrBox
		0.282205	0.085742	0.282296	0
		0.282205	0.0880448	0.2823	0
		0.282205	0.090407	0.2823	9
		0.282206	0.0928302	0.282296	9
		0.282206	0.0953159	0.282296	0
		0.282206	0.0978656	ErrBox	ErrBox
		0.282206	0.100481	0.2823	0
		0.282206	0.103163	0.282304	0
		0.282206	0.105915	0.282304	6
		0.282206	0.108737	0.2823	6
		0.282206	0.111631	0.2823	0
		0.282206	0.114599	ErrBox	ErrBox
		0.282206	0.117643	0.282304	0
		0.282206	0.120765	0.282308	0
		0.282206	0.123967	0.282308	2
		0.282206	0.127251	0.282304	2
		0.282207	0.130618	0.282304	0
		0.282207	0.13407	ErrBox	ErrBox
		0.282207	0.137611	0.282308	0
		0.282207	0.141242	0.282312	0
		0.282207	0.144964	0.282312	6
		0.282207	0.148781	0.282308	6
		0.282207	0.152695	0.282308	0
		0.282207	0.156708	ErrBox	ErrBox
		0.282207	0.160822	0.282312	0
		0.282207	0.16504	0.282316	0
		0.282207	0.169365	0.282316	5
		0.282207	0.173798	0.282312	5
		0.282208	0.178344	0.282312	0
		0.282208	0.183003	ErrBox	ErrBox
		0.282208	0.18778	0.282316	0
		0.282208	0.192677	0.28232	0
		0.282208	0.197697	0.28232	2
		0.282208	0.202842	0.282316	2
		0.282208	0.208117	0.282316	0
		0.282208	0.213523	ErrBox	ErrBox
		0.282208	0.219065	0.28232	0
		0.282208	0.224745	0.282324	0
		0.282208	0.230567	0.282324	2
		0.282208	0.236533	0.28232	2
		0.282208	0.242649	0.28232	0
		0.282209	0.248916	ErrBox	ErrBox
		0.282209	0.25534
		0.282209	0.261923
		0.282209	0.268669
		0.282209	0.275583
		0.282209	0.282668
		0.282209	0.289928
		0.282209	0.297367
		0.282209	0.304991
		0.282209	0.312802
		0.282209	0.320807
		0.282209	0.329008
		0.28221	0.337411
		0.28221	0.346021
		0.28221	0.354842
		0.28221	0.36388
		0.28221	0.373139
		0.28221	0.382625
		0.28221	0.392343
		0.28221	0.402299
		0.28221	0.412498
		0.28221	0.422946
		0.28221	0.433649
		0.28221	0.444613
		0.28221	0.455843
		0.282211	0.467347
		0.282211	0.47913
		0.282211	0.491199
		0.282211	0.503561
		0.282211	0.516223
		0.282211	0.529191
		0.282211	0.542472
		0.282211	0.556075
		0.282211	0.570005
		0.282211	0.584272
		0.282211	0.598883
		0.282211	0.613846
		0.282212	0.629168
		0.282212	0.644859
		0.282212	0.660926
		0.282212	0.677379
		0.282212	0.694226
		0.282212	0.711477
		0.282212	0.72914
		0.282212	0.747225
		0.282212	0.765743
		0.282212	0.784702
		0.282212	0.804113
		0.282212	0.823986
		0.282212	0.844332
		0.282213	0.865162
		0.282213	0.886486
		0.282213	0.908316
		0.282213	0.930664
		0.282213	0.953541
		0.282213	0.97696
		0.282213	1.00093
		0.282213	1.02547
		0.282213	1.05059
		0.282213	1.0763
		0.282213	1.10261
		0.282213	1.12954
		0.282214	1.15711
		0.282214	1.18532
		0.282214	1.2142
		0.282214	1.24375
		0.282214	1.274
		0.282214	1.30495
		0.282214	1.33663
		0.282214	1.36904
		0.282214	1.40222
		0.282214	1.43616
		0.282214	1.4709
		0.282214	1.50644
		0.282214	1.54281
		0.282215	1.58003
		0.282215	1.6181
		0.282215	1.65706
		0.282215	1.69692
		0.282215	1.73771
		0.282215	1.77943
		0.282215	1.82212
		0.282215	1.8658
		0.282215	1.91048
		0.282215	1.95618
		0.282215	2.00294
		0.282215	2.05077
		0.282216	2.0997
		0.282216	2.14976
		0.282216	2.20095
		0.282216	2.25332
		0.282216	2.30689
		0.282216	2.36168
		0.282216	2.41772
		0.282216	2.47503
		0.282216	2.53365
		0.282216	2.5936
		0.282216	2.65491
		0.282216	2.71762
		0.282216	2.78174
		0.282217	2.84732
		0.282217	2.91438
		0.282217	2.98296
		0.282217	3.05308
		0.282217	3.12478
		0.282217	3.1981
		0.282217	3.27307
		0.282217	3.34972
		0.282217	3.4281
		0.282217	3.50823
		0.282217	3.59015
		0.282217	3.67391
		0.282218	3.75954
		0.282218	3.84708
		0.282218	3.93657
		0.282218	4.02806
		0.282218	4.12158
		0.282218	4.21718
		0.282218	4.3149
		0.282218	4.41479
		0.282218	4.51689
		0.282218	4.62125
		0.282218	4.72791
		0.282218	4.83693
		0.282218	4.94835
		0.282219	5.06223
		0.282219	5.17861
		0.282219	5.29754
		0.282219	5.41908
		0.282219	5.54329
		0.282219	5.67021
		0.282219	5.79991
		0.282219	5.93244
		0.282219	6.06786
		0.282219	6.20623
		0.282219	6.3476
		0.282219	6.49205
		0.28222	6.63963
		0.28222	6.79041
		0.28222	6.94445
		0.28222	7.10182
		0.28222	7.26258
		0.28222	7.42682
		0.28222	7.59458
		0.28222	7.76595
		0.28222	7.94101
		0.28222	8.11981
		0.28222	8.30245
		0.28222	8.48898
		0.28222	8.67951
		0.282221	8.87409
		0.282221	9.07282
		0.282221	9.27577
		0.282221	9.48304
		0.282221	9.6947
		0.282221	9.91084
		0.282221	10.1316
		0.282221	10.3569
		0.282221	10.5871
		0.282221	10.822
		0.282221	11.0619
		0.282221	11.3069
		0.282222	11.557
		0.282222	11.8123
		0.282222	12.073
		0.282222	12.3391
		0.282222	12.6107
		0.282222	12.888
		0.282222	13.1711
		0.282222	13.46
		0.282222	13.7549
		0.282222	14.0559
		0.282222	14.3632
		0.282222	14.6767
		0.282222	14.9968
		0.282223	15.3234
		0.282223	15.6567
		0.282223	15.9968
		0.282223	16.3439
		0.282223	16.6981
		0.282223	17.0595
		0.282223	17.4282
		0.282223	17.8045
		0.282223	18.1883
		0.282223	18.58
		0.282223	18.9796
		0.282223	19.3872
		0.282224	19.8031
		0.282224	20.2273
		0.282224	20.6601
		0.282224	21.1015
		0.282224	21.5518
		0.282224	22.011
		0.282224	22.4794
		0.282224	22.9572
		0.282224	23.4444
		0.282224	23.9413
		0.282224	24.4481
		0.282224	24.9648
		0.282224	25.4918
		0.282225	26.0291
		0.282225	26.577
		0.282225	27.1357
		0.282225	27.7053
		0.282225	28.286
		0.282225	28.8781
		0.282225	29.4817
		0.282225	30.097
		0.282225	30.7243
		0.282225	31.3637
		0.282225	32.0154
		0.282225	32.6798
		0.282226	33.3569
		0.282226	34.0471
		0.282226	34.7504
		0.282226	35.4673
		0.282226	36.1978
		0.282226	36.9423
		0.282226	37.7009
		0.282226	38.4739
		0.282226	39.2616
		0.282226	40.0641
		0.282226	40.8818
		0.282226	41.7149
		0.282226	42.5637
		0.282227	43.4284
		0.282227	44.3092
		0.282227	45.2065
		0.282227	46.1205
		0.282227	47.0515
		0.282227	47.9997
		0.282227	48.9655
		0.282227	49.9492
		0.282227	50.951
		0.282227	51.9712
		0.282227	53.0101
		0.282227	54.068
		0.282228	55.1453
		0.282228	56.2422
		0.282228	57.359
		0.282228	58.4961
		0.282228	59.6538
		0.282228	60.8323
		0.282228	62.0321
		0.282228	63.2535
		0.282228	64.4968
		0.282228	65.7623
		0.282228	67.0504
		0.282228	68.3614
		0.282228	69.6958
		0.282229	71.0537
		0.282229	72.4357
		0.282229	73.842
		0.282229	75.2731
		0.282229	76.7293
		0.282229	78.211
		0.282229	79.7185
		0.282229	81.2523
		0.282229	82.8128
		0.282229	84.4003
		0.282229	86.0152
		0.282229	87.658
		0.28223	89.329
		0.28223	91.0287
		0.28223	92.7575
		0.28223	94.5157
		0.28223	96.3039
		0.28223	98.1225
		0.28223	99.9718
		0.28223	101.852
		0.28223	103.765
		0.28223	105.709
		0.28223	107.686
		0.28223	109.696
		0.28223	111.739
		0.282231	113.817
		0.282231	115.929
		0.282231	118.075
		0.282231	120.257
		0.282231	122.475
		0.282231	124.73
		0.282231	127.021
		0.282231	129.349
		0.282231	131.716
		0.282231	134.12
		0.282231	136.564
		0.282231	139.047
		0.282232	141.569
		0.282232	144.132
		0.282232	146.737
		0.282232	149.382
		0.282232	152.07
		0.282232	154.8
		0.282232	157.573
		0.282232	160.39
		0.282232	163.251
		0.282232	166.156
		0.282232	169.108
		0.282232	172.104
		0.282232	175.148
		0.282233	178.238
		0.282233	181.376
		0.282233	184.562
		0.282233	187.797
		0.282233	191.082
		0.282233	194.416
		0.282233	197.801
		0.282233	201.237
		0.282233	204.725
		0.282233	208.265
		0.282233	211.858
		0.282233	215.505
		0.282234	219.206
		0.282234	222.962
		0.282234	226.773
		0.282234	230.641
		0.282234	234.565
		0.282234	238.547
		0.282234	242.587
		0.282234	246.686
		0.282234	250.844
		0.282234	255.062
		0.282234	259.34
		0.282234	263.68
		0.282234	268.082
		0.282235	272.547
		0.282235	277.075
		0.282235	281.667
		0.282235	286.324
		0.282235	291.046
		0.282235	295.835
		0.282235	300.69
		0.282235	305.613
		0.282235	310.603
		0.282235	315.663
		0.282235	320.792
		0.282235	325.992
		0.282236	331.262
		0.282236	336.604
		0.282236	342.019
		0.282236	347.506
		0.282236	353.068
		0.282236	358.704
		0.282236	364.415
		0.282236	370.202
		0.282236	376.066
		0.282236	382.008
		0.282236	388.027
		0.282236	394.125
		0.282236	400.303
		0.282237	406.562
		0.282237	412.901
		0.282237	419.322
		0.282237	425.826
		0.282237	432.413
		0.282237	439.084
		0.282237	445.84
		0.282237	452.681
		0.282237	459.608
		0.282237	466.623
		0.282237	473.725
		0.282237	480.916
		0.282238	488.195
		0.282238	495.565
		0.282238	503.026
		0.282238	510.578
		0.282238	518.222
		0.282238	525.959
		0.282238	533.789
		0.282238	541.714
		0.282238	549.734
		0.282238	557.851
		0.282238	566.063
		0.282238	574.373
		0.282238	582.781
		0.282239	591.288
		0.282239	599.895
		0.282239	608.602
		0.282239	617.41
		0.282239	626.32
		0.282239	635.332
		0.282239	644.447
		0.282239	653.667
		0.282239	662.991
		0.282239	672.421
		0.282239	681.956
		0.282239	691.599
		0.28224	701.349
		0.28224	711.208
		0.28224	721.175
		0.28224	731.253
		0.28224	741.44
		0.28224	751.739
		0.28224	762.15
		0.28224	772.673
		0.28224	783.31
		0.28224	794.06
		0.28224	804.925
		0.28224	815.906
		0.28224	827.002
		0.282241	838.215
		0.282241	849.546
		0.282241	860.994
		0.282241	872.561
		0.282241	884.248
		0.282241	896.054
		0.282241	907.981
		0.282241	920.03
		0.282241	932.2
		0.282241	944.493
		0.282241	956.909
		0.282241	969.45
		0.282242	982.114
		0.282242	994.904
		0.282242	1007.82
		0.282242	1020.86
		0.282242	1034.03
		0.282242	1047.33
		0.282242	1060.75
		0.282242	1074.3
		0.282242	1087.99
		0.282242	1101.8
		0.282242	1115.74
		0.282242	1129.81
		0.282242	1144.02
		0.282243	1158.36
		0.282243	1172.83
		0.282243	1187.43
		0.282243	1202.17
		0.282243	1217.04
		0.282243	1232.04
		0.282243	1247.18
		0.282243	1262.46
		0.282243	1277.87
		0.282243	1293.42
		0.282243	1309.11
		0.282243	1324.93
		0.282244	1340.9
		0.282244	1357
		0.282244	1373.24
		0.282244	1389.62
		0.282244	1406.14
		0.282244	1422.8
		0.282244	1439.6
		0.282244	1456.54
		0.282244	1473.62
		0.282244	1490.85
		0.282244	1508.22
		0.282244	1525.73
		0.282244	1543.38
		0.282245	1561.18
		0.282245	1579.12
		0.282245	1597.2
		0.282245	1615.43
		0.282245	1633.8
		0.282245	1652.32
		0.282245	1670.99
		0.282245	1689.8
		0.282245	1708.75
		0.282245	1727.86
		0.282245	1747.11
		0.282245	1766.5
		0.282246	1786.04
		0.282246	1805.73
		0.282246	1825.57
		0.282246	1845.56
		0.282246	1865.69
		0.282246	1885.97
		0.282246	1906.4
		0.282246	1926.98
		0.282246	1947.7
		0.282246	1968.58
		0.282246	1989.61
		0.282246	2010.78
		0.282246	2032.1
		0.282247	2053.57
		0.282247	2075.2
		0.282247	2096.97
		0.282247	2118.89
		0.282247	2140.96
		0.282247	2163.18
		0.282247	2185.55
		0.282247	2208.07
		0.282247	2230.75
		0.282247	2253.57
		0.282247	2276.54
		0.282247	2299.66
		0.282248	2322.93
		0.282248	2346.35
		0.282248	2369.93
		0.282248	2393.65
		0.282248	2417.52
		0.282248	2441.54
		0.282248	2465.72
		0.282248	2490.04
		0.282248	2514.51
		0.282248	2539.13
		0.282248	2563.9
		0.282248	2588.83
		0.282248	2613.9
		0.282249	2639.12
		0.282249	2664.49
		0.282249	2690
		0.282249	2715.67
		0.282249	2741.49
		0.282249	2767.45
		0.282249	2793.57
		0.282249	2819.83
		0.282249	2846.24
		0.282249	2872.8
		0.282249	2899.5
		0.282249	2926.36
		0.28225	2953.36
		0.28225	2980.5
		0.28225	3007.8
		0.28225	3035.24
		0.28225	3062.82
		0.28225	3090.55
		0.28225	3118.43
		0.28225	3146.46
		0.28225	3174.62
		0.28225	3202.94
		0.28225	3231.39
		0.28225	3259.99
		0.28225	3288.74
		0.282251	3317.63
		0.282251	3346.66
		0.282251	3375.83
		0.282251	3405.15
		0.282251	3434.6
		0.282251	3464.2
		0.282251	3493.94
		0.282251	3523.82
		0.282251	3553.84
		0.282251	3584
		0.282251	3614.3
		0.282251	3644.74
		0.282252	3675.32
		0.282252	3706.03
		0.282252	3736.88
		0.282252	3767.87
		0.282252	3799
		0.282252	3830.26
		0.282252	3861.65
		0.282252	3893.18
		0.282252	3924.85
		0.282252	3956.65
		0.282252	3988.58
		0.282252	4020.65
		0.282252	4052.84
		0.282253	4085.17
		0.282253	4117.63
		0.282253	4150.22
		0.282253	4182.95
		0.282253	4215.8
		0.282253	4248.77
		0.282253	4281.88
		0.282253	4315.11
		0.282253	4348.47
		0.282253	4381.96
		0.282253	4415.57
		0.282253	4449.31
		0.282254	4483.17
		0.282254	4517.16
		0.282254	4551.27
		0.282254	4585.5
		0.282254	4619.85
		0.282254	4654.32
		0.282254	4688.91
		0.282254	4723.62
		0.282254	4758.46
		0.282254	4793.4
		0.282254	4828.47
		0.282254	4863.65
		0.282254	4898.95
		0.282255	4934.36
		0.282255	4969.89
		0.282255	5005.53
		0.282255	5041.29
		0.282255	5077.15
		0.282255	5113.13
		0.282255	5149.22
		0.282255	5185.42
		0.282255	5221.72
		0.282255	5258.14
		0.282255	5294.66
		0.282255	5331.29
		0.282256	5368.02
		0.282256	5404.86
		0.282256	5441.8
		0.282256	5478.84
		0.282256	5515.99
		0.282256	5553.24
		0.282256	5590.59
		0.282256	5628.04
		0.282256	5665.59
		0.282256	5703.23
		0.282256	5740.98
		0.282256	5778.82
		0.282256	5816.75
		0.282257	5854.78
		0.282257	5892.9
		0.282257	5931.12
		0.282257	5969.42
		0.282257	6007.82
		0.282257	6046.31
		0.282257	6084.88
		0.282257	6123.55
		0.282257	6162.3
		0.282257	6201.13
		0.282257	6240.05
		0.282257	6279.06
		0.282258	6318.15
		0.282258	6357.32
		0.282258	6396.57
		0.282258	6435.91
		0.282258	6475.32
		0.282258	6514.81
		0.282258	6554.38
		0.282258	6594.02
		0.282258	6633.74
		0.282258	6673.53
		0.282258	6713.4
		0.282258	6753.34
		0.282258	6793.35
		0.282259	6833.43
		0.282259	6873.58
		0.282259	6913.79
		0.282259	6954.08
		0.282259	6994.43
		0.282259	7034.84
		0.282259	7075.32
		0.282259	7115.87
		0.282259	7156.47
		0.282259	7197.14
		0.282259	7237.86
		0.282259	7278.64
		0.28226	7319.48
		0.28226	7360.38
		0.28226	7401.33
		0.28226	7442.34
		0.28226	7483.4
		0.28226	7524.51
		0.28226	7565.67
		0.28226	7606.88
		0.28226	7648.15
		0.28226	7689.45
		0.28226	7730.81
		0.28226	7772.21
		0.28226	7813.65
		0.282261	7855.14
		0.282261	7896.67
		0.282261	7938.24
		0.282261	7979.85
		0.282261	8021.5
		0.282261	8063.19
		0.282261	8104.91
		0.282261	8146.67
		0.282261	8188.46
		0.282261	8230.28
		0.282261	8272.14
		0.282261	8314.02
		0.282262	8355.94
		0.282262	8397.88
		0.282262	8439.85
		0.282262	8481.85
		0.282262	8523.87
		0.282262	8565.91
		0.282262	8607.98
		0.282262	8650.06
		0.282262	8692.17
		0.282262	8734.3
		0.282262	8776.44
		0.282262	8818.6
		0.282262	8860.77
		0.282263	8902.96
		0.282263	8945.16
		0.282263	8987.37
		0.282263	9029.59
		0.282263	9071.82
		0.282263	9114.06
		0.282263	9156.31
		0.282263	9198.56
		0.282263	9240.81
		0.282263	9283.07
		0.282263	9325.33
		0.282263	9367.59
		0.282264	9409.85
		0.282264	9452.11
		0.282264	9494.36
		0.282264	9536.61
		0.282264	9578.85
		0.282264	9621.09
		0.282264	9663.32
		0.282264	9705.54
		0.282264	9747.75
		0.282264	9789.95
		0.282264	9832.13
		0.282264	9874.31
		0.282264	9916.46
		0.282265	9958.6
		0.282265	10000.7
		0.282265	10042.8
		0.282265	10084.9
		0.282265	10127
		0.282265	10169
		0.282265	10211
		0.282265	10253
		0.282265	10295
		0.282265	10336.9
		0.282265	10378.8
		0.282265	10420.7
		0.282266	10462.6
		0.282266	10504.4
		0.282266	10546.2
		0.282266	10587.9
		0.282266	10629.6
		0.282266	10671.3
		0.282266	10712.9
		0.282266	10754.5
		0.282266	10796.1
		0.282266	10837.6
		0.282266	10879.1
		0.282266	10920.5
		0.282266	10961.9
		0.282267	11003.2
		0.282267	11044.5
		0.282267	11085.8
		0.282267	11127
		0.282267	11168.1
		0.282267	11209.2
		0.282267	11250.2
		0.282267	11291.2
		0.282267	11332.1
		0.282267	11373
		0.282267	11413.8
		0.282267	11454.6
		0.282268	11495.3
		0.282268	11535.9
		0.282268	11576.5
		0.282268	11617
		0.282268	11657.5
		0.282268	11697.8
		0.282268	11738.2
		0.282268	11778.4
		0.282268	11818.6
		0.282268	11858.7
		0.282268	11898.8
		0.282268	11938.7
		0.282268	11978.6
		0.282269	12018.5
		0.282269	12058.2
		0.282269	12097.9
		0.282269	12137.5
		0.282269	12177
		0.282269	12216.5
		0.282269	12255.8
		0.282269	12295.1
		0.282269	12334.3
		0.282269	12373.4
		0.282269	12412.5
		0.282269	12451.4
		0.28227	12490.3
		0.28227	12529.1
		0.28227	12567.8
		0.28227	12606.4
		0.28227	12645
		0.28227	12683.4
		0.28227	12721.7
		0.28227	12760
		0.28227	12798.2
		0.28227	12836.2
		0.28227	12874.2
		0.28227	12912.1
		0.28227	12949.9
		0.282271	12987.6
		0.282271	13025.2
		0.282271	13062.7
		0.282271	13100.1
		0.282271	13137.4
		0.282271	13174.6
		0.282271	13211.7
		0.282271	13248.7
		0.282271	13285.6
		0.282271	13322.4
		0.282271	13359.1
		0.282271	13395.7
		0.282272	13432.2
		0.282272	13468.6
		0.282272	13504.9
		0.282272	13541.1
		0.282272	13577.1
		0.282272	13613.1
		0.282272	13648.9
		0.282272	13684.7
		0.282272	13720.3
		0.282272	13755.8
		0.282272	13791.3
		0.282272	13826.6
		0.282272	13861.7
		0.282273	13896.8
		0.282273	13931.8
		0.282273	13966.7
		0.282273	14001.4
		0.282273	14036
		0.282273	14070.5
		0.282273	14104.9
		0.282273	14139.2
		0.282273	14173.4
		0.282273	14207.4
		0.282273	14241.4
		0.282273	14275.2
		0.282274	14308.9
		0.282274	14342.5
		0.282274	14375.9
		0.282274	14409.3
		0.282274	14442.5
		0.282274	14475.6
		0.282274	14508.6
		0.282274	14541.4
		0.282274	14574.2
		0.282274	14606.8
		0.282274	14639.3
		0.282274	14671.7
		0.282274	14703.9
		0.282275	14736.1
		0.282275	14768.1
		0.282275	14800
		0.282275	14831.7
		0.282275	14863.4
		0.282275	14894.9
		0.282275	14926.3
		0.282275	14957.6
		0.282275	14988.7
		0.282275	15019.7
		0.282275	15050.6
		0.282275	15081.4
		0.282276	15112.1
		0.282276	15142.6
		0.282276	15173
		0.282276	15203.2
		0.282276	15233.4
		0.282276	15263.4
		0.282276	15293.3
		0.282276	15323.1
		0.282276	15352.7
		0.282276	15382.2
		0.282276	15411.6
		0.282276	15440.9
		0.282276	15470
		0.282277	15499
		0.282277	15527.9
		0.282277	15556.6
		0.282277	15585.2
		0.282277	15613.7
		0.282277	15642.1
		0.282277	15670.3
		0.282277	15698.4
		0.282277	15726.4
		0.282277	15754.3
		0.282277	15782
		0.282277	15809.6
		0.282278	15837.1
		0.282278	15864.4
		0.282278	15891.6
		0.282278	15918.7
		0.282278	15945.6
		0.282278	15972.5
		0.282278	15999.2
		0.282278	16025.7
		0.282278	16052.2
		0.282278	16078.5
		0.282278	16104.6
		0.282278	16130.7
		0.282278	16156.6
		0.282279	16182.4
		0.282279	16208.1
		0.282279	16233.6
		0.282279	16259
		0.282279	16284.3
		0.282279	16309.4
		0.282279	16334.4
		0.282279	16359.3
		0.282279	16384
		0.282279	16408.6
		0.282279	16433.1
		0.282279	16457.5
		0.28228	16481.7
		0.28228	16505.8
		0.28228	16529.8
		0.28228	16553.6
		0.28228	16577.3
		0.28228	16600.9
		0.28228	16624.3
		0.28228	16647.6
		0.28228	16670.8
		0.28228	16693.8
		0.28228	16716.8
		0.28228	16739.5
		0.28228	16762.2
		0.282281	16784.7
		0.282281	16807.1
		0.282281	16829.4
		0.282281	16851.5
		0.282281	16873.5
		0.282281	16895.3
		0.282281	16917
		0.282281	16938.6
		0.282281	16960.1
		0.282281	16981.4
		0.282281	17002.6
		0.282281	17023.7
		0.282282	17044.6
		0.282282	17065.4
		0.282282	17086
		0.282282	17106.5
		0.282282	17126.9
		0.282282	17147.2
		0.282282	17167.3
		0.282282	17187.2
		0.282282	17207.1
		0.282282	17226.8
		0.282282	17246.3
		0.282282	17265.8
		0.282282	17285.1
		0.282283	17304.2
		0.282283	17323.2
		0.282283	17342.1
		0.282283	17360.8
		0.282283	17379.4
		0.282283	17397.9
		0.282283	17416.2
		0.282283	17434.4
		0.282283	17452.4
		0.282283	17470.3
		0.282283	17488.1
		0.282283	17505.7
		0.282284	17523.2
		0.282284	17540.5
		0.282284	17557.7
		0.282284	17574.8
		0.282284	17591.7
		0.282284	17608.4
		0.282284	17625.1
		0.282284	17641.5
		0.282284	17657.9
		0.282284	17674
		0.282284	17690.1
		0.282284	17706
		0.282284	17721.7
		0.282285	17737.3
		0.282285	17752.7
		0.282285	17768
		0.282285	17783.2
		0.282285	17798.2
		0.282285	17813
		0.282285	17827.7
		0.282285	17842.2
		0.282285	17856.6
		0.282285	17870.9
		0.282285	17885
		0.282285	17898.9
		0.282286	17912.7
		0.282286	17926.3
		0.282286	17939.8
		0.282286	17953.1
		0.282286	17966.2
		0.282286	17979.2
		0.282286	17992
		0.282286	18004.7
		0.282286	18017.2
		0.282286	18029.6
		0.282286	18041.8
		0.282286	18053.8
		0.282286	18065.7
		0.282287	18077.4
		0.282287	18089
		0.282287	18100.3
		0.282287	18111.5
		0.282287	18122.6
		0.282287	18133.5
		0.282287	18144.2
		0.282287	18154.7
		0.282287	18165.1
		0.282287	18175.3
		0.282287	18185.4
		0.282287	18195.2
		0.282288	18204.9
		0.282288	18214.5
		0.282288	18223.8
		0.282288	18233
		0.282288	18242
		0.282288	18250.8
		0.282288	18259.5
		0.282288	18268
		0.282288	18276.3
		0.282288	18284.4
		0.282288	18292.3
		0.282288	18300.1
		0.282288	18307.7
		0.282289	18315.1
		0.282289	18322.3
		0.282289	18329.3
		0.282289	18336.2
		0.282289	18342.8
		0.282289	18349.3
		0.282289	18355.6
		0.282289	18361.7
		0.282289	18367.6
		0.282289	18373.3
		0.282289	18378.9
		0.282289	18384.2
		0.28229	18389.4
		0.28229	18394.4
		0.28229	18399.1
		0.28229	18403.7
		0.28229	18408.1
		0.28229	18412.3
		0.28229	18416.3
		0.28229	18420.1
		0.28229	18423.7
		0.28229	18427.1
		0.28229	18430.3
		0.28229	18433.3
		0.28229	18436.1
		0.282291	18438.7
		0.282291	18441.2
		0.282291	18443.4
		0.282291	18445.4
		0.282291	18447.2
		0.282291	18448.8
		0.282291	18450.2
		0.282291	18451.3
		0.282291	18452.3
		0.282291	18453.1
		0.282291	18453.7
		0.282291	18454
		0.282292	18454.2
		0.282292	18454.1
		0.282292	18453.8
		0.282292	18453.4
		0.282292	18452.7
		0.282292	18451.8
		0.282292	18450.7
		0.282292	18449.3
		0.282292	18447.8
		0.282292	18446
		0.282292	18444.1
		0.282292	18441.9
		0.282292	18439.5
		0.282293	18436.9
		0.282293	18434
		0.282293	18431
		0.282293	18427.7
		0.282293	18424.2
		0.282293	18420.5
		0.282293	18416.6
		0.282293	18412.5
		0.282293	18408.1
		0.282293	18403.5
		0.282293	18398.7
		0.282293	18393.7
		0.282294	18388.4
		0.282294	18383
		0.282294	18377.3
		0.282294	18371.4
		0.282294	18365.2
		0.282294	18358.9
		0.282294	18352.3
		0.282294	18345.5
		0.282294	18338.5
		0.282294	18331.2
		0.282294	18323.7
		0.282294	18316
		0.282294	18308.1
		0.282295	18299.9
		0.282295	18291.6
		0.282295	18283
		0.282295	18274.1
		0.282295	18265.1
		0.282295	18255.8
		0.282295	18246.3
		0.282295	18236.5
		0.282295	18226.6
		0.282295	18216.4
		0.282295	18206
		0.282295	18195.3
		0.282296	18184.5
		0.282296	18173.4
		0.282296	18162.1
		0.282296	18150.5
		0.282296	18138.7
		0.282296	18126.8
		0.282296	18114.5
		0.282296	18102.1
		0.282296	18089.4
		0.282296	18076.5
		0.282296	18063.4
		0.282296	18050
		0.282296	18036.4
		0.282297	18022.6
		0.282297	18008.6
		0.282297	17994.3
		0.282297	17979.9
		0.282297	17965.1
		0.282297	17950.2
		0.282297	17935.1
		0.282297	17919.7
		0.282297	17904.1
		0.282297	17888.3
		0.282297	17872.2
		0.282297	17855.9
		0.282298	17839.4
		0.282298	17822.7
		0.282298	17805.8
		0.282298	17788.6
		0.282298	17771.2
		0.282298	17753.6
		0.282298	17735.8
		0.282298	17717.8
		0.282298	17699.5
		0.282298	17681
		0.282298	17662.4
		0.282298	17643.4
		0.282298	17624.3
		0.282299	17605
		0.282299	17585.4
		0.282299	17565.6
		0.282299	17545.6
		0.282299	17525.4
		0.282299	17505
		0.282299	17484.3
		0.282299	17463.5
		0.282299	17442.4
		0.282299	17421.2
		0.282299	17399.7
		0.282299	17378
		0.2823	17356.1
		0.2823	17333.9
		0.2823	17311.6
		0.2823	17289.1
		0.2823	17266.3
		0.2823	17243.4
		0.2823	17220.2
		0.2823	17196.9
		0.2823	17173.3
		0.2823	17149.6
		0.2823	17125.6
		0.2823	17101.4
		0.2823	17077.1
		0.282301	17052.5
		0.282301	17027.7
		0.282301	17002.7
		0.282301	16977.6
		0.282301	16952.2
		0.282301	16926.6
		0.282301	16900.9
		0.282301	16874.9
		0.282301	16848.8
		0.282301	16822.4
		0.282301	16795.9
		0.282301	16769.2
		0.282302	16742.2
		0.282302	16715.1
		0.282302	16687.8
		0.282302	16660.3
		0.282302	16632.7
		0.282302	16604.8
		0.282302	16576.8
		0.282302	16548.5
		0.282302	16520.1
		0.282302	16491.5
		0.282302	16462.7
		0.282302	16433.8
		0.282302	16404.6
		0.282303	16375.3
		0.282303	16345.8
		0.282303	16316.1
		0.282303	16286.3
		0.282303	16256.2
		0.282303	16226
		0.282303	16195.6
		0.282303	16165.1
		0.282303	16134.3
		0.282303	16103.4
		0.282303	16072.4
		0.282303	16041.1
		0.282304	16009.7
		0.282304	15978.1
		0.282304	15946.4
		0.282304	15914.5
		0.282304	15882.4
		0.282304	15850.2
		0.282304	15817.7
		0.282304	15785.2
		0.282304	15752.4
		0.282304	15719.6
		0.282304	15686.5
		0.282304	15653.3
		0.282304	15619.9
		0.282305	15586.4
		0.282305	15552.7
		0.282305	15518.9
		0.282305	15484.9
		0.282305	15450.7
		0.282305	15416.4
		0.282305	15382
		0.282305	15347.4
		0.282305	15312.6
		0.282305	15277.8
		0.282305	15242.7
		0.282305	15207.5
		0.282306	15172.2
		0.282306	15136.7
		0.282306	15101.1
		0.282306	15065.3
		0.282306	15029.4
		0.282306	14993.3
		0.282306	14957.1
		0.282306	14920.8
		0.282306	14884.3
		0.282306	14847.7
		0.282306	14810.9
		0.282306	14774
		0.282306	14737
		0.282307	14699.8
		0.282307	14662.5
		0.282307	14625.1
		0.282307	14587.5
		0.282307	14549.8
		0.282307	14512
		0.282307	14474.1
		0.282307	14436
		0.282307	14397.8
		0.282307	14359.4
		0.282307	14321
		0.282307	14282.4
		0.282308	14243.7
		0.282308	14204.8
		0.282308	14165.9
		0.282308	14126.8
		0.282308	14087.6
		0.282308	14048.3
		0.282308	14008.8
		0.282308	13969.3
		0.282308	13929.6
		0.282308	13889.8
		0.282308	13849.9
		0.282308	13809.8
		0.282308	13769.7
		0.282309	13729.4
		0.282309	13689.1
		0.282309	13648.6
		0.282309	13608
		0.282309	13567.3
		0.282309	13526.5
		0.282309	13485.6
		0.282309	13444.5
		0.282309	13403.4
		0.282309	13362.2
		0.282309	13320.8
		0.282309	13279.4
		0.28231	13237.8
		0.28231	13196.1
		0.28231	13154.4
		0.28231	13112.5
		0.28231	13070.6
		0.28231	13028.5
		0.28231	12986.3
		0.28231	12944.1
		0.28231	12901.7
		0.28231	12859.3
		0.28231	12816.7
		0.28231	12774.1
		0.28231	12731.4
		0.282311	12688.6
		0.282311	12645.6
		0.282311	12602.6
		0.282311	12559.5
		0.282311	12516.4
		0.282311	12473.1
		0.282311	12429.7
		0.282311	12386.3
		0.282311	12342.8
		0.282311	12299.1
		0.282311	12255.4
		0.282311	12211.7
		0.282312	12167.8
		0.282312	12123.9
		0.282312	12079.8
		0.282312	12035.7
		0.282312	11991.6
		0.282312	11947.3
		0.282312	11903
		0.282312	11858.6
		0.282312	11814.1
		0.282312	11769.6
		0.282312	11724.9
		0.282312	11680.3
		0.282312	11635.5
		0.282313	11590.7
		0.282313	11545.8
		0.282313	11500.8
		0.282313	11455.8
		0.282313	11410.7
		0.282313	11365.5
		0.282313	11320.3
		0.282313	11275
		0.282313	11229.7
		0.282313	11184.3
		0.282313	11138.8
		0.282313	11093.3
		0.282314	11047.7
		0.282314	11002.1
		0.282314	10956.4
		0.282314	10910.7
		0.282314	10864.9
		0.282314	10819.1
		0.282314	10773.2
		0.282314	10727.3
		0.282314	10681.3
		0.282314	10635.3
		0.282314	10589.2
		0.282314	10543.1
		0.282314	10497
		0.282315	10450.8
		0.282315	10404.6
		0.282315	10358.3
		0.282315	10312
		0.282315	10265.7
		0.282315	10219.3
		0.282315	10172.9
		0.282315	10126.5
		0.282315	10080
		0.282315	10033.5
		0.282315	9987.01
		0.282315	9940.47
		0.282316	9893.9
		0.282316	9847.31
		0.282316	9800.69
		0.282316	9754.06
		0.282316	9707.41
		0.282316	9660.73
		0.282316	9614.05
		0.282316	9567.35
		0.282316	9520.63
		0.282316	9473.9
		0.282316	9427.17
		0.282316	9380.42
		0.282316	9333.67
		0.282317	9286.91
		0.282317	9240.14
		0.282317	9193.37
		0.282317	9146.6
		0.282317	9099.84
		0.282317	9053.07
		0.282317	9006.3
		0.282317	8959.54
		0.282317	8912.79
		0.282317	8866.04
		0.282317	8819.31
		0.282317	8772.58
		0.282318	8725.87
		0.282318	8679.17
		0.282318	8632.48
		0.282318	8585.81
		0.282318	8539.17
		0.282318	8492.54
		0.282318	8445.93
		0.282318	8399.35
		0.282318	8352.79
		0.282318	8306.26
		0.282318	8259.76
		0.282318	8213.28
		0.282318	8166.84
		0.282319	8120.44
		0.282319	8074.06
		0.282319	8027.73
		0.282319	7981.43
		0.282319	7935.17
		0.282319	7888.96
		0.282319	7842.78
		0.282319	7796.66
		0.282319	7750.58
		0.282319	7704.54
		0.282319	7658.56
		0.282319	7612.63
		0.28232	7566.75
		0.28232	7520.93
		0.28232	7475.17
		0.28232	7429.46
		0.28232	7383.81
		0.28232	7338.23
		0.28232	7292.71
		0.28232	7247.25
		0.28232	7201.86
		0.28232	7156.54
		0.28232	7111.29
		0.28232	7066.11
		0.28232	7021
		0.282321	6975.97
		0.282321	6931.02
		0.282321	6886.15
		0.282321	6841.35
		0.282321	6796.64
		0.282321	6752.01
		0.282321	6707.47
		0.282321	6663.01
		0.282321	6618.64
		0.282321	6574.37
		0.282321	6530.18
		0.282321	6486.09
		0.282322	6442.09
		0.282322	6398.19
		0.282322	6354.39
		0.282322	6310.69
		0.282322	6267.09
		0.282322	6223.59
		0.282322	6180.2
		0.282322	6136.91
		0.282322	6093.73
		0.282322	6050.67
		0.282322	6007.71
		0.282322	5964.86
		0.282322	5922.13
		0.282323	5879.52
		0.282323	5837.02
		0.282323	5794.64
		0.282323	5752.38
		0.282323	5710.25
		0.282323	5668.23
		0.282323	5626.34
		0.282323	5584.58
		0.282323	5542.95
		0.282323	5501.44
		0.282323	5460.06
		0.282323	5418.82
		0.282324	5377.71
		0.282324	5336.73
		0.282324	5295.89
		0.282324	5255.19
		0.282324	5214.63
		0.282324	5174.2
		0.282324	5133.92
		0.282324	5093.78
		0.282324	5053.78
		0.282324	5013.93
		0.282324	4974.23
		0.282324	4934.67
		0.282324	4895.26
		0.282325	4856.01
		0.282325	4816.9
		0.282325	4777.95
		0.282325	4739.15
		0.282325	4700.5
		0.282325	4662.01
		0.282325	4623.68
		0.282325	4585.51
		0.282325	4547.5
		0.282325	4509.64
		0.282325	4471.95
		0.282325	4434.42
		0.282326	4397.06
		0.282326	4359.86
		0.282326	4322.82
		0.282326	4285.95
		0.282326	4249.25
		0.282326	4212.72
		0.282326	4176.35
		0.282326	4140.16
		0.282326	4104.13
		0.282326	4068.28
		0.282326	4032.6
		0.282326	3997.1
		0.282326	3961.77
		0.282327	3926.61
		0.282327	3891.63
		0.282327	3856.83
		0.282327	3822.21
		0.282327	3787.76
		0.282327	3753.49
		0.282327	3719.4
		0.282327	3685.49
		0.282327	3651.76
		0.282327	3618.21
		0.282327	3584.85
		0.282327	3551.67
		0.282328	3518.67
		0.282328	3485.85
		0.282328	3453.22
		0.282328	3420.77
		0.282328	3388.51
		0.282328	3356.43
		0.282328	3324.54
		0.282328	3292.83
		0.282328	3261.31
		0.282328	3229.98
		0.282328	3198.83
		0.282328	3167.88
		0.282328	3137.11
		0.282329	3106.53
		0.282329	3076.14
		0.282329	3045.93
		0.282329	3015.92
		0.282329	2986.09
		0.282329	2956.46
		0.282329	2927.01
		0.282329	2897.76
		0.282329	2868.69
		0.282329	2839.82
		0.282329	2811.13
		0.282329	2782.64
		0.28233	2754.33
		0.28233	2726.22
		0.28233	2698.29
		0.28233	2670.56
		0.28233	2643.02
		0.28233	2615.66
		0.28233	2588.5
		0.28233	2561.53
		0.28233	2534.75
		0.28233	2508.15
		0.28233	2481.75
		0.28233	2455.54
		0.28233	2429.52
		0.282331	2403.68
		0.282331	2378.04
		0.282331	2352.59
		0.282331	2327.32
		0.282331	2302.24
		0.282331	2277.36
		0.282331	2252.66
		0.282331	2228.14
		0.282331	2203.82
		0.282331	2179.68
		0.282331	2155.73
		0.282331	2131.97
		0.282332	2108.39
		0.282332	2085
		0.282332	2061.79
		0.282332	2038.77
		0.282332	2015.94
		0.282332	1993.28
		0.282332	1970.82
		0.282332	1948.53
		0.282332	1926.43
		0.282332	1904.51
		0.282332	1882.77
		0.282332	1861.21
		0.282332	1839.84
		0.282333	1818.64
		0.282333	1797.63
		0.282333	1776.79
		0.282333	1756.13
		0.282333	1735.65
		0.282333	1715.35
		0.282333	1695.22
		0.282333	1675.27
		0.282333	1655.5
		0.282333	1635.9
		0.282333	1616.47
		0.282333	1597.22
		0.282334	1578.14
		0.282334	1559.23
		0.282334	1540.49
		0.282334	1521.93
		0.282334	1503.53
		0.282334	1485.31
		0.282334	1467.25
		0.282334	1449.36
		0.282334	1431.64
		0.282334	1414.08
		0.282334	1396.69
		0.282334	1379.46
		0.282334	1362.4
		0.282335	1345.5
		0.282335	1328.76
		0.282335	1312.18
		0.282335	1295.77
		0.282335	1279.51
		0.282335	1263.42
		0.282335	1247.48
		0.282335	1231.69
		0.282335	1216.07
		0.282335	1200.6
		0.282335	1185.28
		0.282335	1170.12
		0.282336	1155.11
		0.282336	1140.26
		0.282336	1125.55
		0.282336	1111
		0.282336	1096.59
		0.282336	1082.33
		0.282336	1068.22
		0.282336	1054.26
		0.282336	1040.44
		0.282336	1026.77
		0.282336	1013.24
		0.282336	999.851
		0.282336	986.606
		0.282337	973.503
		0.282337	960.539
		0.282337	947.715
		0.282337	935.028
		0.282337	922.479
		0.282337	910.066
		0.282337	897.789
		0.282337	885.646
		0.282337	873.636
		0.282337	861.759
		0.282337	850.013
		0.282337	838.398
		0.282338	826.912
		0.282338	815.555
		0.282338	804.326
		0.282338	793.223
		0.282338	782.246
		0.282338	771.394
		0.282338	760.666
		0.282338	750.06
		0.282338	739.577
		0.282338	729.214
		0.282338	718.971
		0.282338	708.847
		0.282338	698.842
		0.282339	688.953
		0.282339	679.181
		0.282339	669.523
		0.282339	659.98
		0.282339	650.55
		0.282339	641.233
		0.282339	632.027
		0.282339	622.931
		0.282339	613.944
		0.282339	605.066
		0.282339	596.296
		0.282339	587.632
		0.28234	579.074
		0.28234	570.62
		0.28234	562.271
		0.28234	554.024
		0.28234	545.879
		0.28234	537.835
		0.28234	529.891
		0.28234	522.046
		0.28234	514.3
		0.28234	506.651
		0.28234	499.098
		0.28234	491.64
		0.28234	484.277
		0.282341	477.008
		0.282341	469.832
		0.282341	462.747
		0.282341	455.754
		0.282341	448.85
		0.282341	442.036
		0.282341	435.31
		0.282341	428.672
		0.282341	422.12
		0.282341	415.654
		0.282341	409.272
		0.282341	402.975
		0.282342	396.76
		0.282342	390.628
		0.282342	384.578
		0.282342	378.608
		0.282342	372.718
		0.282342	366.906
		0.282342	361.173
		0.282342	355.517
		0.282342	349.937
		0.282342	344.433
		0.282342	339.004
		0.282342	333.649
		0.282342	328.367
		0.282343	323.158
		0.282343	318.02
		0.282343	312.953
		0.282343	307.956
		0.282343	303.028
		0.282343	298.169
		0.282343	293.377
		0.282343	288.653
		0.282343	283.995
		0.282343	279.402
		0.282343	274.874
		0.282343	270.41
		0.282344	266.009
		0.282344	261.671
		0.282344	257.395
		0.282344	253.18
		0.282344	249.025
		0.282344	244.93
		0.282344	240.893
		0.282344	236.916
		0.282344	232.995
		0.282344	229.132
		0.282344	225.325
		0.282344	221.574
		0.282344	217.877
		0.282345	214.235
		0.282345	210.646
		0.282345	207.11
		0.282345	203.626
		0.282345	200.194
		0.282345	196.814
		0.282345	193.483
		0.282345	190.202
		0.282345	186.971
		0.282345	183.787
		0.282345	180.652
		0.282345	177.564
		0.282346	174.523
		0.282346	171.528
		0.282346	168.578
		0.282346	165.674
		0.282346	162.814
		0.282346	159.997
		0.282346	157.224
		0.282346	154.494
		0.282346	151.805
		0.282346	149.158
		0.282346	146.553
		0.282346	143.987
		0.282346	141.462
		0.282347	138.976
		0.282347	136.529
		0.282347	134.121
		0.282347	131.75
		0.282347	129.417
		0.282347	127.121
		0.282347	124.86
		0.282347	122.636
		0.282347	120.448
		0.282347	118.294
		0.282347	116.174
		0.282347	114.089
		0.282348	112.037
		0.282348	110.018
		0.282348	108.032
		0.282348	106.078
		0.282348	104.155
		0.282348	102.264
		0.282348	100.404
		0.282348	98.5736
		0.282348	96.7735
		0.282348	95.003
		0.282348	93.2615
		0.282348	91.5487
		0.282348	89.8642
		0.282349	88.2076
		0.282349	86.5785
		0.282349	84.9764
		0.282349	83.4011
		0.282349	81.852
		0.282349	80.3289
		0.282349	78.8313
		0.282349	77.3589
		0.282349	75.9113
		0.282349	74.4881
		0.282349	73.0891
		0.282349	71.7137
		0.28235	70.3618
		0.28235	69.0328
		0.28235	67.7266
		0.28235	66.4427
		0.28235	65.1808
		0.28235	63.9406
		0.28235	62.7217
		0.28235	61.5239
		0.28235	60.3468
		0.28235	59.1901
		0.28235	58.0535
		0.28235	56.9367
		0.28235	55.8393
		0.282351	54.7612
		0.282351	53.7019
		0.282351	52.6612
		0.282351	51.6389
		0.282351	50.6345
		0.282351	49.6479
		0.282351	48.6788
		0.282351	47.7269
		0.282351	46.7919
		0.282351	45.8735
		0.282351	44.9716
		0.282351	44.0857
		0.282352	43.2158
		0.282352	42.3615
		0.282352	41.5226
		0.282352	40.6988
		0.282352	39.8899
		0.282352	39.0957
		0.282352	38.3159
		0.282352	37.5502
		0.282352	36.7986
		0.282352	36.0606
		0.282352	35.3362
		0.282352	34.625
		0.282352	33.927
		0.282353	33.2417
		0.282353	32.5692
		0.282353	31.909
		0.282353	31.2611
		0.282353	30.6253
		0.282353	30.0012
		0.282353	29.3888
		0.282353	28.7879
		0.282353	28.1981
		0.282353	27.6195
		0.282353	27.0517
		0.282353	26.4946
		0.282354	25.948
		0.282354	25.4118
		0.282354	24.8857
		0.282354	24.3696
		0.282354	23.8634
		0.282354	23.3667
		0.282354	22.8796
		0.282354	22.4018
		0.282354	21.9331
		0.282354	21.4735
		0.282354	21.0227
		0.282354	20.5806
		0.282354	20.147
		0.282355	19.7218
		0.282355	19.3049
		0.282355	18.8961
		0.282355	18.4953
		0.282355	18.1022
		0.282355	17.7169
		0.282355	17.3391
		0.282355	16.9687
		0.282355	16.6057
		0.282355	16.2497
		0.282355	15.9008
		0.282355	15.5588
		0.282356	15.2236
		0.282356	14.8951
		0.282356	14.573
		0.282356	14.2574
		0.282356	13.9481
		0.282356	13.645
		0.282356	13.348
		0.282356	13.057
		0.282356	12.7718
		0.282356	12.4923
		0.282356	12.2186
		0.282356	11.9503
		0.282356	11.6875
		0.282357	11.43
		0.282357	11.1778
		0.282357	10.9308
		0.282357	10.6887
		0.282357	10.4517
		0.282357	10.2195
		0.282357	9.99205
		0.282357	9.76931
		0.282357	9.55117
		0.282357	9.33754
		0.282357	9.12834
		0.282357	8.92348
		0.282358	8.72288
		0.282358	8.52646
		0.282358	8.33414
		0.282358	8.14584
		0.282358	7.96149
		0.282358	7.781
		0.282358	7.60432
		0.282358	7.43135
		0.282358	7.26204
		0.282358	7.09631
		0.282358	6.93409
		0.282358	6.77532
		0.282358	6.61992
		0.282359	6.46784
		0.282359	6.319
		0.282359	6.17334
		0.282359	6.03081
		0.282359	5.89133
		0.282359	5.75486
		0.282359	5.62132
		0.282359	5.49067
		0.282359	5.36285
		0.282359	5.23779
		0.282359	5.11545
		0.282359	4.99577
		0.28236	4.87869
		0.28236	4.76418
		0.28236	4.65216
		0.28236	4.5426
		0.28236	4.43545
		0.28236	4.33065
[truncated: 1 more rows]

## Sheet: PlotDat11
Source sheet	Sheet10	0.2822	0.0215732	0.282247	0	0.2822	0
Plot name	ProbDens5	0.2822	0.0222134	0.282251	0	0.28237	0
Plot Type	16	0.2822	0.0228721	0.282251	1
1st free col	9	0.2822	0.0235497	0.282247	1
Sigma Level	2	0.2822	0.0242467	0.282247	0
Absolute Errs	TRUE	0.2822	0.0249637	ErrBox	ErrBox
Symbol Type	1	0.282201	0.0257012	0.282251	0
Inverse Plot	FALSE	0.282201	0.0264599	0.282255	0
Color Plot	TRUE	0.282201	0.0272402	0.282255	1
3D plot	FALSE	0.282201	0.0280428	0.282251	1
Linear	FALSE	0.282201	0.0288683	0.282251	0
Data Range	N2:O143	0.282201	0.0297174	ErrBox	ErrBox
Filled Symbols	FALSE	0.282201	0.0305906	0.282255	0
ConcAge	FALSE	0.282201	0.0314887	0.282259	0
ConcSwap	FALSE	0.282201	0.0324123	0.282259	2
1st Symbol-row	1	0.282201	0.0333621	0.282255	2
		0.282201	0.0343389	0.282255	0
		0.282201	0.0353434	ErrBox	ErrBox
		0.282202	0.0363764	0.282259	0
		0.282202	0.0374386	0.282264	0
		0.282202	0.0385308	0.282264	4
		0.282202	0.0396539	0.282259	4
		0.282202	0.0408086	0.282259	0
		0.282202	0.041996	ErrBox	ErrBox
		0.282202	0.0432168	0.282264	0
		0.282202	0.0444719	0.282268	0
		0.282202	0.0457624	0.282268	7
		0.282202	0.0470891	0.282264	7
		0.282202	0.048453	0.282264	0
		0.282202	0.0498553	ErrBox	ErrBox
		0.282203	0.0512968	0.282268	0
		0.282203	0.0527786	0.282272	0
		0.282203	0.054302	0.282272	10
		0.282203	0.0558678	0.282268	10
		0.282203	0.0574775	0.282268	0
		0.282203	0.059132	ErrBox	ErrBox
		0.282203	0.0608326	0.282272	0
		0.282203	0.0625806	0.282276	0
		0.282203	0.0643772	0.282276	7
		0.282203	0.0662238	0.282272	7
		0.282203	0.0681216	0.282272	0
		0.282203	0.0700721	ErrBox	ErrBox
		0.282204	0.0720767	0.282276	0
		0.282204	0.0741369	0.282281	0
		0.282204	0.076254	0.282281	15
		0.282204	0.0784297	0.282276	15
		0.282204	0.0806654	0.282276	0
		0.282204	0.0829629	ErrBox	ErrBox
		0.282204	0.0853237	0.282281	0
		0.282204	0.0877496	0.282285	0
		0.282204	0.0902423	0.282285	13
		0.282204	0.0928035	0.282281	13
		0.282204	0.0954351	0.282281	0
		0.282205	0.098139	ErrBox	ErrBox
		0.282205	0.100917	0.282285	0
		0.282205	0.103771	0.282289	0
		0.282205	0.106704	0.282289	12
		0.282205	0.109716	0.282285	12
		0.282205	0.112811	0.282285	0
		0.282205	0.11599	ErrBox	ErrBox
		0.282205	0.119257	0.282289	0
		0.282205	0.122612	0.282293	0
		0.282205	0.126058	0.282293	12
		0.282205	0.129599	0.282289	12
		0.282205	0.133236	0.282289	0
		0.282206	0.136971	ErrBox	ErrBox
		0.282206	0.140808	0.282294	0
		0.282206	0.144749	0.282298	0
		0.282206	0.148797	0.282298	14
		0.282206	0.152954	0.282294	14
		0.282206	0.157224	0.282294	0
		0.282206	0.161609	ErrBox	ErrBox
		0.282206	0.166112	0.282298	0
		0.282206	0.170737	0.282302	0
		0.282206	0.175487	0.282302	10
		0.282206	0.180364	0.282298	10
		0.282206	0.185373	0.282298	0
		0.282207	0.190517	ErrBox	ErrBox
		0.282207	0.195798	0.282302	0
		0.282207	0.201222	0.282306	0
		0.282207	0.20679	0.282306	7
		0.282207	0.212508	0.282302	7
		0.282207	0.218379	0.282302	0
		0.282207	0.224407	ErrBox	ErrBox
		0.282207	0.230596	0.282306	0
		0.282207	0.23695	0.28231	0
		0.282207	0.243474	0.28231	9
		0.282207	0.250171	0.282306	9
		0.282207	0.257047	0.282306	0
		0.282208	0.264106	ErrBox	ErrBox
		0.282208	0.271352	0.282311	0
		0.282208	0.27879	0.282315	0
		0.282208	0.286426	0.282315	6
		0.282208	0.294265	0.282311	6
		0.282208	0.30231	0.282311	0
		0.282208	0.310569	ErrBox	ErrBox
		0.282208	0.319046	0.282315	0
		0.282208	0.327747	0.282319	0
		0.282208	0.336677	0.282319	7
		0.282208	0.345843	0.282315	7
		0.282209	0.35525	0.282315	0
		0.282209	0.364904	ErrBox	ErrBox
		0.282209	0.374813	0.282319	0
		0.282209	0.384981	0.282323	0
		0.282209	0.395416	0.282323	3
		0.282209	0.406125	0.282319	3
		0.282209	0.417115	0.282319	0
		0.282209	0.428392	ErrBox	ErrBox
		0.282209	0.439964	0.282323	0
		0.282209	0.451838	0.282328	0
		0.282209	0.464021	0.282328	1
		0.282209	0.476523	0.282323	1
		0.28221	0.48935	0.282323	0
		0.28221	0.502511	ErrBox	ErrBox
		0.28221	0.516014	0.282328	0
		0.28221	0.529867	0.282332	0
		0.28221	0.54408	0.282332	1
		0.28221	0.558662	0.282328	1
		0.28221	0.573621	0.282328	0
		0.28221	0.588967	ErrBox	ErrBox
		0.28221	0.60471
		0.28221	0.620859
		0.28221	0.637425
		0.28221	0.654417
		0.282211	0.671848
		0.282211	0.689726
		0.282211	0.708064
		0.282211	0.726873
		0.282211	0.746164
		0.282211	0.76595
		0.282211	0.786242
		0.282211	0.807052
		0.282211	0.828394
		0.282211	0.850281
		0.282211	0.872726
		0.282211	0.895742
		0.282212	0.919344
		0.282212	0.943546
		0.282212	0.968361
		0.282212	0.993807
		0.282212	1.0199
		0.282212	1.04665
		0.282212	1.07407
		0.282212	1.10219
		0.282212	1.13102
		0.282212	1.16058
		0.282212	1.19087
		0.282212	1.22194
		0.282213	1.25378
		0.282213	1.28642
		0.282213	1.31987
		0.282213	1.35417
		0.282213	1.38932
		0.282213	1.42535
		0.282213	1.46228
		0.282213	1.50014
		0.282213	1.53893
		0.282213	1.57869
		0.282213	1.61943
		0.282214	1.66119
		0.282214	1.70398
		0.282214	1.74783
		0.282214	1.79276
		0.282214	1.83881
		0.282214	1.88599
		0.282214	1.93433
		0.282214	1.98386
		0.282214	2.03461
		0.282214	2.08661
		0.282214	2.13988
		0.282214	2.19445
		0.282215	2.25036
		0.282215	2.30763
		0.282215	2.3663
		0.282215	2.42641
		0.282215	2.48797
		0.282215	2.55103
		0.282215	2.61562
		0.282215	2.68178
		0.282215	2.74953
		0.282215	2.81893
		0.282215	2.89
		0.282215	2.96279
		0.282216	3.03733
		0.282216	3.11366
		0.282216	3.19182
		0.282216	3.27186
		0.282216	3.35382
		0.282216	3.43774
		0.282216	3.52366
		0.282216	3.61163
		0.282216	3.7017
		0.282216	3.79391
		0.282216	3.88831
		0.282216	3.98495
		0.282217	4.08388
		0.282217	4.18515
		0.282217	4.28881
		0.282217	4.39492
		0.282217	4.50352
		0.282217	4.61468
		0.282217	4.72845
		0.282217	4.84489
		0.282217	4.96405
		0.282217	5.086
		0.282217	5.21079
		0.282218	5.33849
		0.282218	5.46917
		0.282218	5.60287
		0.282218	5.73969
		0.282218	5.87967
		0.282218	6.02288
		0.282218	6.16941
		0.282218	6.31931
		0.282218	6.47266
		0.282218	6.62953
		0.282218	6.79
		0.282218	6.95415
		0.282219	7.12205
		0.282219	7.29378
		0.282219	7.46943
		0.282219	7.64907
		0.282219	7.83279
		0.282219	8.02068
		0.282219	8.21282
		0.282219	8.4093
		0.282219	8.61021
		0.282219	8.81565
		0.282219	9.02571
		0.282219	9.24047
		0.28222	9.46005
		0.28222	9.68454
		0.28222	9.91404
		0.28222	10.1487
		0.28222	10.3885
		0.28222	10.6336
		0.28222	10.8842
		0.28222	11.1403
		0.28222	11.4021
		0.28222	11.6697
		0.28222	11.9431
		0.28222	12.2225
		0.282221	12.5081
		0.282221	12.7999
		0.282221	13.0981
		0.282221	13.4027
		0.282221	13.714
		0.282221	14.0321
		0.282221	14.357
		0.282221	14.689
		0.282221	15.0281
		0.282221	15.3745
		0.282221	15.7284
		0.282222	16.0898
		0.282222	16.459
		0.282222	16.8361
		0.282222	17.2212
		0.282222	17.6144
		0.282222	18.0161
		0.282222	18.4262
		0.282222	18.845
		0.282222	19.2727
		0.282222	19.7093
		0.282222	20.1551
		0.282222	20.6103
		0.282223	21.0749
		0.282223	21.5493
		0.282223	22.0335
		0.282223	22.5278
		0.282223	23.0323
		0.282223	23.5473
		0.282223	24.0729
		0.282223	24.6093
		0.282223	25.1568
		0.282223	25.7154
		0.282223	26.2855
		0.282223	26.8672
		0.282224	27.4608
		0.282224	28.0664
		0.282224	28.6842
		0.282224	29.3146
		0.282224	29.9577
		0.282224	30.6137
		0.282224	31.2828
		0.282224	31.9654
		0.282224	32.6616
		0.282224	33.3717
		0.282224	34.0959
		0.282224	34.8344
		0.282225	35.5876
		0.282225	36.3556
		0.282225	37.1388
		0.282225	37.9373
		0.282225	38.7515
		0.282225	39.5815
		0.282225	40.4278
		0.282225	41.2904
		0.282225	42.1699
		0.282225	43.0663
		0.282225	43.98
		0.282226	44.9113
		0.282226	45.8604
		0.282226	46.8278
		0.282226	47.8136
		0.282226	48.8181
		0.282226	49.8418
		0.282226	50.8848
		0.282226	51.9475
		0.282226	53.0303
		0.282226	54.1333
		0.282226	55.2571
		0.282226	56.4018
		0.282227	57.5679
		0.282227	58.7557
		0.282227	59.9654
		0.282227	61.1975
		0.282227	62.4524
		0.282227	63.7302
		0.282227	65.0315
		0.282227	66.3566
		0.282227	67.7058
		0.282227	69.0796
		0.282227	70.4782
		0.282227	71.9021
		0.282228	73.3516
		0.282228	74.8272
		0.282228	76.3292
		0.282228	77.8581
		0.282228	79.4141
		0.282228	80.9978
		0.282228	82.6095
		0.282228	84.2497
		0.282228	85.9187
		0.282228	87.617
		0.282228	89.3449
		0.282228	91.1031
		0.282229	92.8917
		0.282229	94.7114
		0.282229	96.5625
		0.282229	98.4455
		0.282229	100.361
		0.282229	102.309
		0.282229	104.29
		0.282229	106.305
		0.282229	108.355
		0.282229	110.439
		0.282229	112.558
		0.282229	114.712
		0.28223	116.903
		0.28223	119.13
		0.28223	121.394
		0.28223	123.696
		0.28223	126.036
		0.28223	128.414
		0.28223	130.832
		0.28223	133.289
		0.28223	135.786
		0.28223	138.324
		0.28223	140.902
		0.282231	143.523
		0.282231	146.186
		0.282231	148.891
		0.282231	151.64
		0.282231	154.432
		0.282231	157.269
		0.282231	160.15
		0.282231	163.077
		0.282231	166.051
		0.282231	169.07
		0.282231	172.137
		0.282231	175.252
		0.282232	178.414
		0.282232	181.626
		0.282232	184.887
		0.282232	188.198
		0.282232	191.56
		0.282232	194.973
		0.282232	198.437
		0.282232	201.954
		0.282232	205.524
		0.282232	209.148
		0.282232	212.826
		0.282232	216.558
		0.282233	220.346
		0.282233	224.19
		0.282233	228.091
		0.282233	232.049
		0.282233	236.065
		0.282233	240.139
		0.282233	244.273
		0.282233	248.466
		0.282233	252.72
		0.282233	257.035
		0.282233	261.411
		0.282233	265.85
		0.282234	270.352
		0.282234	274.918
		0.282234	279.548
		0.282234	284.243
		0.282234	289.003
		0.282234	293.83
		0.282234	298.724
		0.282234	303.685
		0.282234	308.715
		0.282234	313.813
		0.282234	318.981
		0.282235	324.22
		0.282235	329.529
		0.282235	334.91
		0.282235	340.364
		0.282235	345.89
		0.282235	351.49
		0.282235	357.164
		0.282235	362.914
		0.282235	368.739
		0.282235	374.64
		0.282235	380.619
		0.282235	386.675
		0.282236	392.81
		0.282236	399.024
		0.282236	405.318
		0.282236	411.692
		0.282236	418.148
		0.282236	424.685
		0.282236	431.305
		0.282236	438.009
		0.282236	444.796
		0.282236	451.668
		0.282236	458.626
		0.282236	465.669
		0.282237	472.8
		0.282237	480.018
		0.282237	487.323
		0.282237	494.718
		0.282237	502.203
		0.282237	509.777
		0.282237	517.443
		0.282237	525.2
		0.282237	533.049
		0.282237	540.992
		0.282237	549.028
		0.282237	557.159
		0.282238	565.384
		0.282238	573.706
		0.282238	582.124
		0.282238	590.639
		0.282238	599.252
		0.282238	607.963
		0.282238	616.774
		0.282238	625.684
		0.282238	634.695
		0.282238	643.807
		0.282238	653.022
		0.282239	662.338
		0.282239	671.758
		0.282239	681.282
		0.282239	690.911
		0.282239	700.644
		0.282239	710.484
		0.282239	720.43
		0.282239	730.484
		0.282239	740.645
		0.282239	750.915
		0.282239	761.294
		0.282239	771.783
		0.28224	782.382
		0.28224	793.093
		0.28224	803.915
		0.28224	814.85
		0.28224	825.898
		0.28224	837.059
		0.28224	848.335
		0.28224	859.726
		0.28224	871.232
		0.28224	882.855
		0.28224	894.594
		0.28224	906.451
		0.282241	918.426
		0.282241	930.519
		0.282241	942.732
		0.282241	955.064
		0.282241	967.517
		0.282241	980.091
		0.282241	992.786
		0.282241	1005.6
		0.282241	1018.54
		0.282241	1031.61
		0.282241	1044.8
		0.282241	1058.11
		0.282242	1071.55
		0.282242	1085.11
		0.282242	1098.8
		0.282242	1112.61
		0.282242	1126.56
		0.282242	1140.63
		0.282242	1154.83
		0.282242	1169.15
		0.282242	1183.61
		0.282242	1198.2
		0.282242	1212.92
		0.282243	1227.76
		0.282243	1242.74
		0.282243	1257.86
		0.282243	1273.1
		0.282243	1288.48
		0.282243	1303.99
		0.282243	1319.63
		0.282243	1335.41
		0.282243	1351.33
		0.282243	1367.38
		0.282243	1383.56
		0.282243	1399.88
		0.282244	1416.34
		0.282244	1432.94
		0.282244	1449.67
		0.282244	1466.54
		0.282244	1483.55
		0.282244	1500.7
		0.282244	1517.99
		0.282244	1535.42
		0.282244	1552.99
		0.282244	1570.7
		0.282244	1588.55
		0.282244	1606.54
		0.282245	1624.67
		0.282245	1642.95
		0.282245	1661.36
		0.282245	1679.92
		0.282245	1698.63
		0.282245	1717.48
		0.282245	1736.47
		0.282245	1755.61
		0.282245	1774.89
		0.282245	1794.31
		0.282245	1813.89
		0.282245	1833.6
		0.282246	1853.47
		0.282246	1873.48
		0.282246	1893.63
		0.282246	1913.94
		0.282246	1934.39
		0.282246	1954.99
		0.282246	1975.74
		0.282246	1996.63
		0.282246	2017.68
		0.282246	2038.87
		0.282246	2060.21
		0.282246	2081.7
		0.282247	2103.34
		0.282247	2125.14
		0.282247	2147.08
		0.282247	2169.17
		0.282247	2191.41
		0.282247	2213.8
		0.282247	2236.35
		0.282247	2259.04
		0.282247	2281.89
		0.282247	2304.89
		0.282247	2328.04
		0.282248	2351.34
		0.282248	2374.8
		0.282248	2398.41
		0.282248	2422.17
		0.282248	2446.08
		0.282248	2470.15
		0.282248	2494.37
		0.282248	2518.74
		0.282248	2543.27
		0.282248	2567.95
		0.282248	2592.78
		0.282248	2617.77
		0.282249	2642.92
		0.282249	2668.21
		0.282249	2693.66
		0.282249	2719.27
		0.282249	2745.03
		0.282249	2770.95
		0.282249	2797.02
		0.282249	2823.24
		0.282249	2849.62
		0.282249	2876.15
		0.282249	2902.84
		0.282249	2929.69
		0.28225	2956.69
		0.28225	2983.85
		0.28225	3011.16
		0.28225	3038.62
		0.28225	3066.24
		0.28225	3094.02
		0.28225	3121.95
		0.28225	3150.04
		0.28225	3178.28
		0.28225	3206.68
		0.28225	3235.24
		0.28225	3263.95
		0.282251	3292.81
		0.282251	3321.83
		0.282251	3351.01
		0.282251	3380.34
		0.282251	3409.83
		0.282251	3439.47
		0.282251	3469.26
		0.282251	3499.22
		0.282251	3529.32
		0.282251	3559.58
		0.282251	3590
		0.282252	3620.57
		0.282252	3651.3
		0.282252	3682.18
		0.282252	3713.21
		0.282252	3744.4
		0.282252	3775.75
		0.282252	3807.24
		0.282252	3838.9
		0.282252	3870.7
		0.282252	3902.66
		0.282252	3934.77
		0.282252	3967.04
		0.282253	3999.45
		0.282253	4032.02
		0.282253	4064.75
		0.282253	4097.62
		0.282253	4130.65
		0.282253	4163.83
		0.282253	4197.16
		0.282253	4230.65
		0.282253	4264.28
		0.282253	4298.07
		0.282253	4332
		0.282253	4366.09
		0.282254	4400.33
		0.282254	4434.71
		0.282254	4469.25
		0.282254	4503.94
		0.282254	4538.77
		0.282254	4573.75
		0.282254	4608.88
		0.282254	4644.16
		0.282254	4679.59
		0.282254	4715.16
		0.282254	4750.88
		0.282254	4786.75
		0.282255	4822.76
		0.282255	4858.92
		0.282255	4895.23
		0.282255	4931.67
		0.282255	4968.27
		0.282255	5005
		0.282255	5041.88
		0.282255	5078.9
		0.282255	5116.07
		0.282255	5153.38
		0.282255	5190.83
		0.282256	5228.42
		0.282256	5266.15
		0.282256	5304.01
		0.282256	5342.02
		0.282256	5380.17
		0.282256	5418.46
		0.282256	5456.88
		0.282256	5495.44
		0.282256	5534.14
		0.282256	5572.98
		0.282256	5611.94
		0.282256	5651.05
		0.282257	5690.29
		0.282257	5729.66
		0.282257	5769.16
		0.282257	5808.8
		0.282257	5848.56
		0.282257	5888.46
		0.282257	5928.49
		0.282257	5968.65
		0.282257	6008.93
		0.282257	6049.35
		0.282257	6089.89
		0.282257	6130.55
		0.282258	6171.35
		0.282258	6212.26
		0.282258	6253.3
		0.282258	6294.47
		0.282258	6335.76
		0.282258	6377.16
		0.282258	6418.69
		0.282258	6460.34
		0.282258	6502.11
		0.282258	6543.99
		0.282258	6586
		0.282258	6628.12
		0.282259	6670.35
		0.282259	6712.7
		0.282259	6755.16
		0.282259	6797.74
		0.282259	6840.42
		0.282259	6883.22
		0.282259	6926.13
		0.282259	6969.15
		0.282259	7012.27
		0.282259	7055.5
		0.282259	7098.83
		0.282259	7142.28
		0.28226	7185.82
		0.28226	7229.47
		0.28226	7273.21
		0.28226	7317.06
		0.28226	7361.01
		0.28226	7405.06
		0.28226	7449.2
		0.28226	7493.44
		0.28226	7537.77
		0.28226	7582.2
		0.28226	7626.72
		0.282261	7671.33
		0.282261	7716.03
		0.282261	7760.82
		0.282261	7805.7
		0.282261	7850.66
		0.282261	7895.71
		0.282261	7940.85
		0.282261	7986.06
		0.282261	8031.36
		0.282261	8076.74
		0.282261	8122.2
		0.282261	8167.74
		0.282262	8213.35
		0.282262	8259.04
		0.282262	8304.8
		0.282262	8350.63
		0.282262	8396.54
		0.282262	8442.51
		0.282262	8488.56
		0.282262	8534.67
		0.282262	8580.84
		0.282262	8627.09
		0.282262	8673.39
		0.282262	8719.76
		0.282263	8766.18
		0.282263	8812.67
		0.282263	8859.21
		0.282263	8905.81
		0.282263	8952.47
		0.282263	8999.17
		0.282263	9045.93
		0.282263	9092.74
		0.282263	9139.6
		0.282263	9186.51
		0.282263	9233.46
		0.282263	9280.46
		0.282264	9327.5
		0.282264	9374.58
		0.282264	9421.7
		0.282264	9468.86
		0.282264	9516.06
		0.282264	9563.29
		0.282264	9610.56
		0.282264	9657.86
		0.282264	9705.19
		0.282264	9752.55
		0.282264	9799.94
		0.282265	9847.36
		0.282265	9894.8
		0.282265	9942.26
		0.282265	9989.75
		0.282265	10037.3
		0.282265	10084.8
		0.282265	10132.3
		0.282265	10179.9
		0.282265	10227.5
		0.282265	10275
		0.282265	10322.6
		0.282265	10370.2
		0.282266	10417.8
		0.282266	10465.5
		0.282266	10513.1
		0.282266	10560.7
		0.282266	10608.3
		0.282266	10656
		0.282266	10703.6
		0.282266	10751.2
		0.282266	10798.8
		0.282266	10846.5
		0.282266	10894.1
		0.282266	10941.7
		0.282267	10989.2
		0.282267	11036.8
		0.282267	11084.4
		0.282267	11131.9
		0.282267	11179.4
		0.282267	11226.9
		0.282267	11274.4
		0.282267	11321.9
		0.282267	11369.3
		0.282267	11416.7
		0.282267	11464.1
		0.282267	11511.5
		0.282268	11558.8
		0.282268	11606.1
		0.282268	11653.4
		0.282268	11700.6
		0.282268	11747.8
		0.282268	11795
		0.282268	11842.1
		0.282268	11889.1
		0.282268	11936.2
		0.282268	11983.2
		0.282268	12030.1
		0.282269	12077
		0.282269	12123.8
		0.282269	12170.6
		0.282269	12217.4
		0.282269	12264.1
		0.282269	12310.7
		0.282269	12357.3
		0.282269	12403.8
		0.282269	12450.3
		0.282269	12496.7
		0.282269	12543
		0.282269	12589.3
		0.28227	12635.5
		0.28227	12681.7
		0.28227	12727.7
		0.28227	12773.7
		0.28227	12819.7
		0.28227	12865.5
		0.28227	12911.3
		0.28227	12957
		0.28227	13002.7
		0.28227	13048.2
		0.28227	13093.7
		0.28227	13139.1
		0.282271	13184.4
		0.282271	13229.7
		0.282271	13274.8
		0.282271	13319.9
		0.282271	13364.8
		0.282271	13409.7
		0.282271	13454.5
		0.282271	13499.2
		0.282271	13543.8
		0.282271	13588.3
		0.282271	13632.7
		0.282271	13677
		0.282272	13721.2
		0.282272	13765.3
		0.282272	13809.3
		0.282272	13853.2
		0.282272	13897
		0.282272	13940.7
		0.282272	13984.3
		0.282272	14027.8
		0.282272	14071.1
		0.282272	14114.4
		0.282272	14157.5
		0.282273	14200.6
		0.282273	14243.5
		0.282273	14286.3
		0.282273	14328.9
		0.282273	14371.5
		0.282273	14413.9
		0.282273	14456.2
		0.282273	14498.4
		0.282273	14540.5
		0.282273	14582.4
		0.282273	14624.2
		0.282273	14665.9
		0.282274	14707.5
		0.282274	14748.9
		0.282274	14790.2
		0.282274	14831.4
		0.282274	14872.4
		0.282274	14913.3
		0.282274	14954
		0.282274	14994.6
		0.282274	15035.1
		0.282274	15075.4
		0.282274	15115.6
		0.282274	15155.7
		0.282275	15195.6
		0.282275	15235.3
		0.282275	15275
		0.282275	15314.4
		0.282275	15353.7
		0.282275	15392.9
		0.282275	15431.9
		0.282275	15470.8
		0.282275	15509.5
		0.282275	15548
		0.282275	15586.4
		0.282275	15624.7
		0.282276	15662.8
		0.282276	15700.7
		0.282276	15738.5
		0.282276	15776.1
		0.282276	15813.5
		0.282276	15850.8
		0.282276	15887.9
		0.282276	15924.8
		0.282276	15961.6
		0.282276	15998.2
		0.282276	16034.6
		0.282276	16070.9
		0.282277	16107
		0.282277	16142.9
		0.282277	16178.7
		0.282277	16214.3
		0.282277	16249.7
		0.282277	16284.9
		0.282277	16319.9
		0.282277	16354.8
		0.282277	16389.5
		0.282277	16424
		0.282277	16458.3
		0.282278	16492.4
		0.282278	16526.4
		0.282278	16560.2
		0.282278	16593.7
		0.282278	16627.1
		0.282278	16660.3
		0.282278	16693.3
		0.282278	16726.2
		0.282278	16758.8
		0.282278	16791.2
		0.282278	16823.5
		0.282278	16855.5
		0.282279	16887.4
		0.282279	16919
		0.282279	16950.5
		0.282279	16981.7
		0.282279	17012.8
		0.282279	17043.6
		0.282279	17074.2
		0.282279	17104.7
		0.282279	17134.9
		0.282279	17165
		0.282279	17194.8
		0.282279	17224.4
		0.28228	17253.8
		0.28228	17283
		0.28228	17312
		0.28228	17340.7
		0.28228	17369.3
		0.28228	17397.6
		0.28228	17425.8
		0.28228	17453.7
		0.28228	17481.4
		0.28228	17508.8
		0.28228	17536.1
		0.28228	17563.1
		0.282281	17589.9
		0.282281	17616.5
		0.282281	17642.9
		0.282281	17669
		0.282281	17694.9
		0.282281	17720.6
		0.282281	17746.1
		0.282281	17771.3
		0.282281	17796.3
		0.282281	17821
		0.282281	17845.6
		0.282282	17869.9
		0.282282	17893.9
		0.282282	17917.7
		0.282282	17941.3
		0.282282	17964.7
		0.282282	17987.8
		0.282282	18010.7
		0.282282	18033.3
		0.282282	18055.7
		0.282282	18077.9
		0.282282	18099.8
		0.282282	18121.4
		0.282283	18142.8
		0.282283	18164
		0.282283	18184.9
		0.282283	18205.6
		0.282283	18226
		0.282283	18246.2
		0.282283	18266.1
		0.282283	18285.8
		0.282283	18305.2
		0.282283	18324.4
		0.282283	18343.3
		0.282283	18361.9
		0.282284	18380.3
		0.282284	18398.4
		0.282284	18416.3
		0.282284	18433.9
		0.282284	18451.3
		0.282284	18468.4
		0.282284	18485.2
		0.282284	18501.7
		0.282284	18518
		0.282284	18534.1
		0.282284	18549.8
		0.282284	18565.3
		0.282285	18580.6
		0.282285	18595.5
		0.282285	18610.2
		0.282285	18624.6
		0.282285	18638.8
		0.282285	18652.7
		0.282285	18666.3
		0.282285	18679.6
		0.282285	18692.6
		0.282285	18705.4
		0.282285	18717.9
		0.282286	18730.1
		0.282286	18742.1
		0.282286	18753.7
		0.282286	18765.1
		0.282286	18776.2
		0.282286	18787
		0.282286	18797.6
		0.282286	18807.8
		0.282286	18817.8
		0.282286	18827.5
		0.282286	18836.9
		0.282286	18846
		0.282287	18854.8
		0.282287	18863.4
		0.282287	18871.6
		0.282287	18879.6
		0.282287	18887.3
		0.282287	18894.7
		0.282287	18901.8
		0.282287	18908.6
		0.282287	18915.1
		0.282287	18921.3
		0.282287	18927.2
		0.282287	18932.9
		0.282288	18938.2
		0.282288	18943.3
		0.282288	18948
		0.282288	18952.5
		0.282288	18956.6
		0.282288	18960.5
		0.282288	18964.1
		0.282288	18967.3
		0.282288	18970.3
		0.282288	18973
		0.282288	18975.4
		0.282288	18977.5
		0.282289	18979.2
		0.282289	18980.7
		0.282289	18981.9
		0.282289	18982.8
		0.282289	18983.4
		0.282289	18983.6
		0.282289	18983.6
		0.282289	18983.3
		0.282289	18982.7
		0.282289	18981.8
		0.282289	18980.5
		0.28229	18979
		0.28229	18977.2
		0.28229	18975.1
		0.28229	18972.6
		0.28229	18969.9
		0.28229	18966.9
		0.28229	18963.5
		0.28229	18959.9
		0.28229	18955.9
		0.28229	18951.7
		0.28229	18947.1
		0.28229	18942.3
		0.282291	18937.1
		0.282291	18931.7
		0.282291	18925.9
		0.282291	18919.9
		0.282291	18913.5
		0.282291	18906.8
		0.282291	18899.9
		0.282291	18892.6
		0.282291	18885.1
		0.282291	18877.2
		0.282291	18869
		0.282291	18860.6
		0.282292	18851.8
		0.282292	18842.7
		0.282292	18833.4
		0.282292	18823.7
		0.282292	18813.8
		0.282292	18803.5
		0.282292	18792.9
		0.282292	18782.1
		0.282292	18770.9
		0.282292	18759.5
		0.282292	18747.8
		0.282292	18735.7
		0.282293	18723.4
		0.282293	18710.8
		0.282293	18697.9
		0.282293	18684.7
		0.282293	18671.2
		0.282293	18657.4
		0.282293	18643.3
		0.282293	18628.9
		0.282293	18614.3
		0.282293	18599.3
		0.282293	18584.1
		0.282294	18568.6
		0.282294	18552.8
		0.282294	18536.7
		0.282294	18520.3
		0.282294	18503.7
		0.282294	18486.7
		0.282294	18469.5
		0.282294	18452
		0.282294	18434.2
		0.282294	18416.2
		0.282294	18397.8
		0.282294	18379.2
		0.282295	18360.3
		0.282295	18341.2
		0.282295	18321.8
		0.282295	18302.1
		0.282295	18282.1
		0.282295	18261.8
		0.282295	18241.3
		0.282295	18220.5
		0.282295	18199.5
		0.282295	18178.2
		0.282295	18156.6
		0.282295	18134.8
		0.282296	18112.7
		0.282296	18090.4
		0.282296	18067.7
		0.282296	18044.9
		0.282296	18021.8
		0.282296	17998.4
		0.282296	17974.7
		0.282296	17950.9
		0.282296	17926.7
		0.282296	17902.4
		0.282296	17877.7
		0.282296	17852.9
		0.282297	17827.8
		0.282297	17802.4
		0.282297	17776.8
		0.282297	17751
		0.282297	17724.9
		0.282297	17698.6
		0.282297	17672
		0.282297	17645.3
		0.282297	17618.3
		0.282297	17591
		0.282297	17563.6
		0.282297	17535.9
		0.282298	17508
		0.282298	17479.8
		0.282298	17451.5
		0.282298	17422.9
		0.282298	17394.1
		0.282298	17365.1
		0.282298	17335.8
		0.282298	17306.4
		0.282298	17276.8
		0.282298	17246.9
		0.282298	17216.8
		0.282299	17186.6
		0.282299	17156.1
		0.282299	17125.4
		0.282299	17094.5
		0.282299	17063.4
		0.282299	17032.2
		0.282299	17000.7
		0.282299	16969
		0.282299	16937.2
		0.282299	16905.1
		0.282299	16872.9
		0.282299	16840.5
		0.2823	16807.9
		0.2823	16775.1
		0.2823	16742.1
		0.2823	16709
		0.2823	16675.7
		0.2823	16642.2
		0.2823	16608.5
		0.2823	16574.7
		0.2823	16540.7
		0.2823	16506.5
		0.2823	16472.1
		0.2823	16437.6
		0.282301	16403
		0.282301	16368.1
		0.282301	16333.2
		0.282301	16298
		0.282301	16262.7
		0.282301	16227.3
		0.282301	16191.7
		0.282301	16155.9
		0.282301	16120
		0.282301	16084
		0.282301	16047.8
		0.282301	16011.5
		0.282302	15975
		0.282302	15938.4
		0.282302	15901.7
		0.282302	15864.8
		0.282302	15827.8
		0.282302	15790.7
		0.282302	15753.4
		0.282302	15716
		0.282302	15678.5
		0.282302	15640.8
		0.282302	15603.1
		0.282303	15565.2
		0.282303	15527.2
		0.282303	15489.1
		0.282303	15450.8
		0.282303	15412.5
		0.282303	15374
		0.282303	15335.4
		0.282303	15296.7
		0.282303	15258
		0.282303	15219.1
		0.282303	15180.1
		0.282303	15141
		0.282304	15101.8
		0.282304	15062.5
		0.282304	15023.1
		0.282304	14983.6
		0.282304	14944
		0.282304	14904.3
		0.282304	14864.6
		0.282304	14824.7
		0.282304	14784.7
		0.282304	14744.7
		0.282304	14704.6
		0.282304	14664.4
		0.282305	14624.1
		0.282305	14583.7
		0.282305	14543.3
		0.282305	14502.8
		0.282305	14462.2
		0.282305	14421.5
		0.282305	14380.8
		0.282305	14339.9
		0.282305	14299.1
		0.282305	14258.1
		0.282305	14217.1
		0.282305	14176
		0.282306	14134.8
		0.282306	14093.6
		0.282306	14052.3
		0.282306	14010.9
		0.282306	13969.5
		0.282306	13928.1
		0.282306	13886.5
		0.282306	13844.9
		0.282306	13803.3
		0.282306	13761.6
		0.282306	13719.8
		0.282307	13678
		0.282307	13636.2
		0.282307	13594.3
		0.282307	13552.3
		0.282307	13510.3
		0.282307	13468.3
		0.282307	13426.2
		0.282307	13384
		0.282307	13341.8
		0.282307	13299.6
		0.282307	13257.3
		0.282307	13215
		0.282308	13172.7
		0.282308	13130.3
		0.282308	13087.8
		0.282308	13045.4
		0.282308	13002.9
		0.282308	12960.3
		0.282308	12917.7
		0.282308	12875.1
		0.282308	12832.5
		0.282308	12789.8
		0.282308	12747.1
		0.282308	12704.3
		0.282309	12661.6
		0.282309	12618.8
		0.282309	12575.9
		0.282309	12533.1
		0.282309	12490.2
		0.282309	12447.3
		0.282309	12404.4
		0.282309	12361.4
		0.282309	12318.4
		0.282309	12275.4
		0.282309	12232.4
		0.282309	12189.3
		0.28231	12146.2
		0.28231	12103.1
		0.28231	12060
		0.28231	12016.9
		0.28231	11973.7
		0.28231	11930.6
		0.28231	11887.4
		0.28231	11844.2
		0.28231	11801
		0.28231	11757.7
		0.28231	11714.5
		0.282311	11671.2
		0.282311	11627.9
		0.282311	11584.6
		0.282311	11541.3
		0.282311	11498
		0.282311	11454.7
		0.282311	11411.3
		0.282311	11368
		0.282311	11324.6
		0.282311	11281.2
		0.282311	11237.9
		0.282311	11194.5
		0.282312	11151.1
		0.282312	11107.7
		0.282312	11064.3
		0.282312	11020.8
		0.282312	10977.4
		0.282312	10934
		0.282312	10890.6
		0.282312	10847.1
		0.282312	10803.7
		0.282312	10760.2
		0.282312	10716.8
		0.282312	10673.4
		0.282313	10629.9
		0.282313	10586.5
		0.282313	10543
		0.282313	10499.6
		0.282313	10456.1
		0.282313	10412.7
		0.282313	10369.2
		0.282313	10325.8
		0.282313	10282.4
		0.282313	10238.9
		0.282313	10195.5
		0.282313	10152.1
		0.282314	10108.7
		0.282314	10065.2
		0.282314	10021.8
		0.282314	9978.44
		0.282314	9935.05
		0.282314	9891.67
		0.282314	9848.3
		0.282314	9804.93
		0.282314	9761.58
		0.282314	9718.24
		0.282314	9674.9
		0.282314	9631.58
		0.282315	9588.28
		0.282315	9544.98
		0.282315	9501.7
		0.282315	9458.44
		0.282315	9415.19
		0.282315	9371.95
		0.282315	9328.74
		0.282315	9285.54
		0.282315	9242.35
		0.282315	9199.19
		0.282315	9156.05
		0.282316	9112.92
		0.282316	9069.82
		0.282316	9026.74
		0.282316	8983.68
		0.282316	8940.64
		0.282316	8897.63
		0.282316	8854.64
		0.282316	8811.67
		0.282316	8768.74
		0.282316	8725.82
		0.282316	8682.94
		0.282316	8640.09
		0.282317	8597.26
		0.282317	8554.46
		0.282317	8511.7
		0.282317	8468.96
		0.282317	8426.26
		0.282317	8383.6
		0.282317	8340.96
		0.282317	8298.36
		0.282317	8255.8
		0.282317	8213.27
		0.282317	8170.79
		0.282317	8128.34
		0.282318	8085.92
		0.282318	8043.55
		0.282318	8001.22
		0.282318	7958.94
		0.282318	7916.69
		0.282318	7874.49
		0.282318	7832.34
		0.282318	7790.23
		0.282318	7748.17
		0.282318	7706.15
		0.282318	7664.19
		0.282318	7622.27
		0.282319	7580.41
		0.282319	7538.59
		0.282319	7496.83
		0.282319	7455.13
		0.282319	7413.47
		0.282319	7371.88
		0.282319	7330.34
		0.282319	7288.86
		0.282319	7247.44
		0.282319	7206.07
		0.282319	7164.77
		0.28232	7123.53
		0.28232	7082.36
		0.28232	7041.24
		0.28232	7000.2
		0.28232	6959.22
		0.28232	6918.3
		0.28232	6877.46
		0.28232	6836.68
		0.28232	6795.98
		0.28232	6755.34
		0.28232	6714.78
		0.28232	6674.3
		0.282321	6633.88
		0.282321	6593.55
		0.282321	6553.29
		0.282321	6513.11
		0.282321	6473.01
		0.282321	6432.99
		0.282321	6393.05
		0.282321	6353.19
		0.282321	6313.42
		0.282321	6273.73
		0.282321	6234.13
		0.282321	6194.62
		0.282322	6155.19
		0.282322	6115.85
		0.282322	6076.6
		0.282322	6037.45
		0.282322	5998.39
		0.282322	5959.42
		0.282322	5920.54
		0.282322	5881.76
		0.282322	5843.08
		0.282322	5804.5
		0.282322	5766.01
		0.282322	5727.63
		0.282323	5689.35
		0.282323	5651.17
		0.282323	5613.09
		0.282323	5575.12
		0.282323	5537.25
		0.282323	5499.49
		0.282323	5461.83
		0.282323	5424.29
		0.282323	5386.86
		0.282323	5349.53
		0.282323	5312.32
		0.282324	5275.22
		0.282324	5238.24
		0.282324	5201.37
		0.282324	5164.61
		0.282324	5127.98
		0.282324	5091.46
		0.282324	5055.06
		0.282324	5018.78
		0.282324	4982.62
		0.282324	4946.58
		0.282324	4910.66
		0.282324	4874.87
		0.282325	4839.2
		0.282325	4803.66
		0.282325	4768.25
		0.282325	4732.96
		0.282325	4697.8
		0.282325	4662.77
		0.282325	4627.87
		0.282325	4593.1
		0.282325	4558.47
		0.282325	4523.96
		0.282325	4489.59
		0.282325	4455.35
		0.282326	4421.25
		0.282326	4387.29
		0.282326	4353.46
		0.282326	4319.76
		0.282326	4286.21
		0.282326	4252.8
		0.282326	4219.52
		0.282326	4186.39
		0.282326	4153.39
		0.282326	4120.54
		0.282326	4087.83
		0.282326	4055.27
		0.282327	4022.85
		0.282327	3990.57
		0.282327	3958.44
		0.282327	3926.45
		0.282327	3894.61
		0.282327	3862.92
		0.282327	3831.38
		0.282327	3799.98
		0.282327	3768.73
		0.282327	3737.63
		0.282327	3706.69
		0.282328	3675.89
		0.282328	3645.24
		0.282328	3614.75
		0.282328	3584.4
		0.282328	3554.21
		0.282328	3524.17
		0.282328	3494.29
		0.282328	3464.56
		0.282328	3434.98
		0.282328	3405.56
		0.282328	3376.29
		0.282328	3347.18
		0.282329	3318.22
		0.282329	3289.42
		0.282329	3260.77
		0.282329	3232.28
		0.282329	3203.95
		0.282329	3175.78
		0.282329	3147.76
		0.282329	3119.9
		0.282329	3092.2
		0.282329	3064.66
		0.282329	3037.27
		0.282329	3010.04
		0.28233	2982.98
		0.28233	2956.07
		0.28233	2929.32
		0.28233	2902.72
		0.28233	2876.29
		0.28233	2850.02
		0.28233	2823.91
		0.28233	2797.95
		0.28233	2772.16
		0.28233	2746.52
		0.28233	2721.05
		0.28233	2695.73
		0.282331	2670.58
		0.282331	2645.58
		0.282331	2620.74
		0.282331	2596.07
		0.282331	2571.55
		0.282331	2547.19
		0.282331	2522.99
		0.282331	2498.95
		0.282331	2475.07
		0.282331	2451.35
		0.282331	2427.79
		0.282331	2404.39
		0.282332	2381.15
		0.282332	2358.06
		0.282332	2335.13
		0.282332	2312.36
		0.282332	2289.75
		0.282332	2267.3
		0.282332	2245
		0.282332	2222.86
		0.282332	2200.88
		0.282332	2179.06
		0.282332	2157.39
		0.282333	2135.87
		0.282333	2114.52
		0.282333	2093.32
		0.282333	2072.27
		0.282333	2051.38
		0.282333	2030.64
		0.282333	2010.06
		0.282333	1989.63
		0.282333	1969.36
		0.282333	1949.24
		0.282333	1929.27
		0.282333	1909.45
		0.282334	1889.79
		0.282334	1870.28
		0.282334	1850.91
		0.282334	1831.7
		0.282334	1812.64
		0.282334	1793.73
		0.282334	1774.97
		0.282334	1756.35
		0.282334	1737.89
		0.282334	1719.57
		0.282334	1701.4
		0.282334	1683.37
		0.282335	1665.5
		0.282335	1647.76
		0.282335	1630.18
		0.282335	1612.74
		0.282335	1595.44
		0.282335	1578.28
		0.282335	1561.27
		0.282335	1544.4
		0.282335	1527.67
		0.282335	1511.08
		0.282335	1494.64
		0.282335	1478.33
		0.282336	1462.17
		0.282336	1446.14
		0.282336	1430.25
		0.282336	1414.49
		0.282336	1398.88
		0.282336	1383.4
		0.282336	1368.05
		0.282336	1352.84
		0.282336	1337.77
		0.282336	1322.83
		0.282336	1308.02
		0.282337	1293.34
		0.282337	1278.8
		0.282337	1264.38
		0.282337	1250.1
		0.282337	1235.95
		0.282337	1221.92
		0.282337	1208.02
		0.282337	1194.25
		0.282337	1180.61
		0.282337	1167.1
		0.282337	1153.7
		0.282337	1140.44
		0.282338	1127.29
		0.282338	1114.27
		0.282338	1101.38
		0.282338	1088.6
		0.282338	1075.95
		0.282338	1063.41
		0.282338	1051
		0.282338	1038.7
		0.282338	1026.53
		0.282338	1014.47
		0.282338	1002.52
		0.282338	990.694
		0.282339	978.982
		0.282339	967.384
		0.282339	955.899
		0.282339	944.528
		0.282339	933.269
		0.282339	922.121
		0.282339	911.084
		0.282339	900.157
		0.282339	889.339
		0.282339	878.629
		0.282339	868.028
		0.282339	857.533
		0.28234	847.144
		0.28234	836.861
		0.28234	826.683
		0.28234	816.609
		0.28234	806.637
		0.28234	796.769
		0.28234	787.002
		0.28234	777.336
		0.28234	767.77
		0.28234	758.304
		0.28234	748.936
		0.282341	739.667
		0.282341	730.494
		0.282341	721.419
		0.282341	712.439
		0.282341	703.554
		0.282341	694.763
		0.282341	686.066
		0.282341	677.462
		0.282341	668.95
		0.282341	660.529
		0.282341	652.199
		0.282341	643.958
		0.282342	635.807
		0.282342	627.745
		0.282342	619.77
		0.282342	611.882
		0.282342	604.08
		0.282342	596.364
		0.282342	588.733
		0.282342	581.186
		0.282342	573.722
		0.282342	566.341
		0.282342	559.043
		0.282342	551.825
		0.282343	544.688
		0.282343	537.631
		0.282343	530.654
		0.282343	523.754
		0.282343	516.933
		0.282343	510.189
		0.282343	503.521
		0.282343	496.929
		0.282343	490.413
		0.282343	483.971
		0.282343	477.602
		0.282343	471.307
		0.282344	465.084
		0.282344	458.933
		0.282344	452.853
		0.282344	446.843
		0.282344	440.904
		0.282344	435.033
		0.282344	429.231
		0.282344	423.497
		0.282344	417.831
		0.282344	412.23
		0.282344	406.696
		0.282344	401.228
		0.282345	395.823
		0.282345	390.484
		0.282345	385.207
		0.282345	379.994
		0.282345	374.842
		0.282345	369.753
		0.282345	364.724
		0.282345	359.756
		0.282345	354.848
		0.282345	349.999
		0.282345	345.209
		0.282346	340.477
		0.282346	335.802
		0.282346	331.185
		0.282346	326.623
		0.282346	322.118
		0.282346	317.668
		0.282346	313.272
		0.282346	308.931
		0.282346	304.643
		0.282346	300.408
		0.282346	296.226
		0.282346	292.096
		0.282347	288.017
		0.282347	283.989
		0.282347	280.011
		0.282347	276.083
		0.282347	272.204
		0.282347	268.374
		0.282347	264.593
		0.282347	260.859
		0.282347	257.172
		0.282347	253.532
		0.282347	249.938
		0.282347	246.39
		0.282348	242.887
		0.282348	239.429
		0.282348	236.015
		0.282348	232.644
		0.282348	229.318
		0.282348	226.033
		0.282348	222.792
		0.282348	219.592
		0.282348	216.433
		0.282348	213.316
		0.282348	210.239
		0.282348	207.202
		0.282349	204.205
		0.282349	201.247
		0.282349	198.327
		0.282349	195.446
		0.282349	192.603
		0.282349	189.797
		0.282349	187.028
		0.282349	184.296
		0.282349	181.6
		0.282349	178.939
		0.282349	176.314
		0.28235	173.724
		0.28235	171.169
		0.28235	168.647
		0.28235	166.159
		0.28235	163.705
		0.28235	161.284
		0.28235	158.895
		0.28235	156.538
		0.28235	154.213
		0.28235	151.92
		0.28235	149.657
		0.28235	147.425
		0.282351	145.224
		0.282351	143.053
		0.282351	140.911
		0.282351	138.798
		0.282351	136.715
		0.282351	134.659
		0.282351	132.633
		0.282351	130.634
		0.282351	128.662
		0.282351	126.718
		0.282351	124.8
		0.282351	122.909
		0.282352	121.045
		0.282352	119.206
		0.282352	117.393
		0.282352	115.605
		0.282352	113.842
		0.282352	112.103
		0.282352	110.389
		0.282352	108.699
		0.282352	107.033
		0.282352	105.39
		0.282352	103.771
		0.282352	102.174
		0.282353	100.6
		0.282353	99.0475
		0.282353	97.5176
		0.282353	96.0093
		0.282353	94.5226
		0.282353	93.057
		0.282353	91.6123
		0.282353	90.1882
		0.282353	88.7845
		0.282353	87.401
		0.282353	86.0373
		0.282354	84.6932
		0.282354	83.3684
		0.282354	82.0628
		0.282354	80.776
		0.282354	79.5078
		0.282354	78.258
		0.282354	77.0263
		0.282354	75.8125
		0.282354	74.6164
		0.282354	73.4377
		0.282354	72.2762
		0.282354	71.1316
		0.282355	70.0038
		0.282355	68.8926
		0.282355	67.7976
		0.282355	66.7188
		0.282355	65.6558
		0.282355	64.6085
		0.282355	63.5767
		0.282355	62.5601
		0.282355	61.5585
		0.282355	60.5718
		0.282355	59.5998
		0.282355	58.6422
		0.282356	57.6989
		0.282356	56.7696
		0.282356	55.8542
		0.282356	54.9525
		0.282356	54.0643
		0.282356	53.1894
		0.282356	52.3276
		0.282356	51.4788
		0.282356	50.6427
		0.282356	49.8193
		0.282356	49.0083
		0.282356	48.2096
		0.282357	47.4229
		0.282357	46.6482
		0.282357	45.8852
		0.282357	45.1338
		0.282357	44.3939
		0.282357	43.6652
		0.282357	42.9477
		0.282357	42.2411
		0.282357	41.5454
		0.282357	40.8602
		0.282357	40.1856
		0.282358	39.5214
		0.282358	38.8674
		0.282358	38.2234
		0.282358	37.5894
		0.282358	36.9652
		0.282358	36.3506
		0.282358	35.7456
		0.282358	35.1499
		0.282358	34.5634
		0.282358	33.9861
		0.282358	33.4178
		0.282358	32.8583
		0.282359	32.3076
		0.282359	31.7654
		0.282359	31.2317
		0.282359	30.7064
		0.282359	30.1894
		0.282359	29.6804
		0.282359	29.1795
		0.282359	28.6864
		0.282359	28.2011
		0.282359	27.7235
		0.282359	27.2534
		0.282359	26.7908
		0.28236	26.3355
		0.28236	25.8874
		0.28236	25.4464
		0.28236	25.0124
		0.28236	24.5854
		0.28236	24.1651
		0.28236	23.7516
		0.28236	23.3446
		0.28236	22.9442
		0.28236	22.5502
		0.28236	22.1625
		0.28236	21.7811
		0.282361	21.4057
		0.282361	21.0365
		0.282361	20.6731
		0.282361	20.3156
		0.282361	19.964
		0.282361	19.618
		0.282361	19.2776
		0.282361	18.9427
		0.282361	18.6132
		0.282361	18.2892
		0.282361	17.9703
		0.282361	17.6567
		0.282362	17.3482
		0.282362	17.0448
		0.282362	16.7463
		0.282362	16.4527
		0.282362	16.1639
		0.282362	15.8798
		0.282362	15.6005
		0.282362	15.3257
		0.282362	15.0554
		0.282362	14.7896
		0.282362	14.5282
		0.282363	14.2711
		0.282363	14.0183
		0.282363	13.7696
		0.282363	13.5251
		0.282363	13.2847
		0.282363	13.0482
		0.282363	12.8157
		0.282363	12.5871
		0.282363	12.3622
		0.282363	12.1412
		0.282363	11.9238
		0.282363	11.7101
		0.282364	11.4999
		0.282364	11.2933
		0.282364	11.0902
		0.282364	10.8905
		0.282364	10.6941
		0.282364	10.5011
		0.282364	10.3113
		0.282364	10.1248
		0.282364	9.94135
		0.282364	9.76106
		0.282364	9.58382
		0.282364	9.4096
		0.282365	9.23834
		0.282365	9.07
		0.282365	8.90453
		0.282365	8.74189
		0.282365	8.58203
		0.282365	8.4249
		0.282365	8.27047
		0.282365	8.11869
		0.282365	7.96952
		0.282365	7.82291
		0.282365	7.67882
		0.282365	7.53723
		0.282366	7.39807
		0.282366	7.26132
		0.282366	7.12694
		0.282366	6.99489
		0.282366	6.86512
		0.282366	6.73761
		0.282366	6.61232
		0.282366	6.48921
		0.282366	6.36825
		0.282366	6.24939
		0.282366	6.13262
		0.282367	6.01788
		0.282367	5.90516
		0.282367	5.79441
		0.282367	5.68561
		0.282367	5.57872
		0.282367	5.47371
		0.282367	5.37056
		0.282367	5.26922
		0.282367	5.16967
		0.282367	5.07189
		0.282367	4.97583
		0.282367	4.88148
		0.282368	4.78881
		0.282368	4.69778
		0.282368	4.60837
		0.282368	4.52056
		0.282368	4.43431
		0.282368	4.3496
		0.282368	4.26641
		0.282368	4.18471
		0.282368	4.10447
		0.282368	4.02567
		0.282368	3.94829
		0.282368	3.87231
		0.282369	3.79769
		0.282369	3.72442
		0.282369	3.65247
		0.282369	3.58182
		0.282369	3.51245
		0.282369	3.44434
		0.282369	3.37747
		0.282369	3.31181
		0.282369	3.24735
		0.282369	3.18407
		0.282369	3.12193
		0.282369	3.06094
		0.28237	3.00106
		0.28237	2.94227
		0.28237	2.88457
		0.28237	2.82792
		0.28237	2.77232
[truncated: 1 more rows]

## Sheet: PlotDat13
Source sheet	All	0.3	0.282289	1	0.282277	2.28343e-05
Plot name	Average7	142.7	0.282289	2	0.282288	2.30284e-05
Plot Type	15			3	0.2823	2.15967e-05
1st free col	8			4	0.282288	1.98e-05
Sigma Level	2			5	0.282268	2.06476e-05
Absolute Errs	TRUE			6	0.282273	2.0059e-05
Symbol Type	1			7	0.282298	2.32729e-05
Inverse Plot	FALSE			8	0.28226	2.25972e-05
Color Plot	TRUE			9	0.282297	2.38373e-05
3D plot	FALSE			10	0.282293	2.12786e-05
Linear	FALSE			11	0.2823	2.34537e-05
Data Range	N2:O143			12	0.282302	2.27676e-05
Filled Symbols	FALSE			13	0.28229	2.30253e-05
ConcAge	FALSE			14	0.282276	2.1821e-05
ConcSwap	FALSE			15	0.28228	2.16096e-05
1st Symbol-row	1			16	0.282271	2.39263e-05
				17	0.282259	2.62353e-05
				18	0.282288	2.69216e-05
				19	0.282271	2.21572e-05
				20	0.28228	2.4109e-05
				21	0.2823	2.3635e-05
				22	0.282283	2.44346e-05
				23	0.282297	2.64488e-05
				24	0.282322	2.30716e-05
				25	0.282279	2.07777e-05
				26	0.282275	1.84779e-05
				27	0.282309	2.03762e-05
				28	0.282287	2.17362e-05
				29	0.282266	2.48045e-05
				30	0.282315	2.10965e-05
				31	0.282267	2.14319e-05
				32	0.282261	2.23272e-05
				33	0.282264	2.25706e-05
				34	0.282291	2.16806e-05
				35	0.28227	2.01446e-05
				36	0.28227	2.07298e-05
				37	0.282307	2.06092e-05
				38	0.282315	1.95734e-05
				39	0.282286	2.19821e-05
				40	0.282311	2.2668e-05
				41	0.282301	2.09758e-05
				42	0.282295	2.39824e-05
				43	0.282265	2.18505e-05
				44	0.282314	2.34252e-05
				45	0.282265	2.06783e-05
				46	0.282292	2.00585e-05
				47	0.282299	1.92023e-05
				48	0.282271	2.3878e-05
				49	0.2823	2.20963e-05
				50	0.282302	1.84433e-05
				51	0.282279	2.11784e-05
				52	0.282283	2.17494e-05
				53	0.282303	2.2554e-05
				54	0.2823	2.12158e-05
				55	0.282274	2.04195e-05
				56	0.282297	1.99994e-05
				57	0.28231	2.12501e-05
				58	0.282312	2.14316e-05
				59	0.282311	1.96681e-05
				60	0.2823	2.04247e-05
				61	0.282259	2.21991e-05
				62	0.28228	2.15481e-05
				63	0.282294	2.10358e-05
				64	0.282285	2.08508e-05
				65	0.282296	2.0165e-05
				66	0.282283	2.08496e-05
				67	0.282285	2.0352e-05
				68	0.282311	2.12334e-05
				69	0.282279	1.99953e-05
				70	0.282316	2.51506e-05
				71	0.282289	2.27905e-05
				72	0.28229	2.10478e-05
				73	0.282305	2.39439e-05
				74	0.282311	2.26548e-05
				75	0.282295	2.02193e-05
				76	0.282285	2.41548e-05
				77	0.282295	2.47195e-05
				78	0.282255	1.8974e-05
				79	0.28229	2.16644e-05
				80	0.282317	2.10592e-05
				81	0.282317	2.00936e-05
				82	0.282277	2.45725e-05
				83	0.28232	2.31224e-05
				84	0.282291	2.15295e-05
				85	0.282282	1.88233e-05
				86	0.282267	2.0846e-05
				87	0.282291	2.00375e-05
				88	0.282297	1.78329e-05
				89	0.282283	2.12047e-05
				90	0.282251	1.94125e-05
				91	0.28229	1.86221e-05
				92	0.282316	2.15747e-05
				93	0.28227	1.89065e-05
				94	0.282284	2.12053e-05
				95	0.282285	2.33039e-05
				96	0.282288	2.17492e-05
				97	0.282303	2.13556e-05
				98	0.282287	2.14863e-05
				99	0.282319	2.14274e-05
				100	0.282297	2.12421e-05
				101	0.282294	2.62e-05
				102	0.282279	2.38e-05
				103	0.282285	2.56e-05
				104	0.282283	2.62e-05
				105	0.282288	2.7e-05
				106	0.282285	2.42e-05
				107	0.28228	2.78e-05
				108	0.282327	2.24e-05
				109	0.282303	3.16e-05
				110	0.28227	2.62e-05
				111	0.282307	3.02e-05
				112	0.282276	3.24e-05
				113	0.282269	2.26e-05
				114	0.282292	2.68e-05
				115	0.282275	2.48e-05
				116	0.282292	2.72e-05
				117	0.282279	2.74e-05
				118	0.282279	2.6e-05
				119	0.282295	2.36e-05
				120	0.282271	2.46e-05
				121	0.282278	2.8e-05
				122	0.282287	2.42e-05
				123	0.282281	2.72e-05
				124	0.282279	2.74e-05
				125	0.282293	2.5e-05
				126	0.282299	2.74e-05
				127	0.282307	2.62e-05
				128	0.282263	2.74e-05
				129	0.282305	2.24e-05
				130	0.282293	2.5e-05
				131	0.282318	2.72e-05
				132	0.282271	2.88e-05
				133	0.282309	2.72e-05
				134	0.282274	3.02e-05
				135	0.282261	2.54e-05
				136	0.282307	2.32e-05
				137	0.282328	2.78e-05
				138	0.282309	2.76e-05
				139	0.28228	2.9e-05
				140	0.282297	2.74e-05
				141	0.282286	2.82e-05
				142	0.28231	2.76e-05
				IsoLine	IsoLine	IsoLine	IsoLine

## Sheet: Table S1_LA-Trace element
	Table S1. Individual Trace Element analyses By LA-ICP-MS
Session	Sample	Ti	La	Ce	Pr	Nd	Sm	Eu	Gd	Tb	Dy	Ho	Er	Tm	Yb	Lu	Hf	Pb	Th	U	Th/U	T °C (Ti-in-zircon)
Session 1	SA02-1	29.82	0.311	122.2	3.57	42.62	36.77	19.09	84.64	17.43	137.33	35.2	122.03	20.25	153.26	25.88	8184.23	306.77	2155.33	547.35	3.93775	847.055
(n=56)	SA02-2	29.59	0.302	121.1	3.68	43.04	36.2	19.39	85.34	17.39	136.98	35.13	122.73	20.13	153.35	25.49	8129.44	308.38	2182.88	553.69	3.94242	846.225
	SA02-3	27.97	0.363	120.84	3.63	42.6	35.11	18.78	82.76	16.82	132.9	34.83	119.21	19.79	150.65	25.3	8069.38	303.82	2111.48	541.23	3.90126	840.228
	SA02-4	26.99	0.347	122.61	3.63	42.8	35.74	19.27	83.59	16.73	135.42	34.99	120.84	19.99	153.02	25.18	8103.55	306.75	2123.89	551.18	3.85335	836.462
	SA02-5	29.11	0.352	122	3.6	41.88	36.14	19.25	82.51	17.34	136.51	34.9	121.58	20.05	152.02	25.49	8154.33	303.48	2141.18	550.75	3.88775	844.476
	SA02-6	27.97	0.307	118.68	3.6	41.52	34.73	18.96	81.35	17.05	134.5	33.97	119.78	19.44	151.4	25.03	7987.86	288.53	2009.46	538.59	3.73096	840.228
	SA02-7	26.64	0.335	123.7	3.64	43.62	37.18	19.74	83.5	17.32	139.93	35.71	122.97	20.05	154.5	25.55	8353.33	303.24	2144.28	548.46	3.90964	835.09
	SA02-8	29	0.352	130.78	3.98	46.24	38.95	20.85	88.51	18.21	143.74	36	125.59	20.4	158.34	26.69	8377.63	315.42	2213.18	568.82	3.89083	844.072
	SA02-9	28.74	0.374	128.05	3.96	44.91	39.27	20.16	89.44	17.78	142.32	35.92	125.54	20.49	160.62	26.24	8478.79	314.29	2177.73	566.45	3.84452	843.112
	SA02-10	27.04	0.388	128.17	3.99	45.27	36.83	19.9	88.43	18.1	144.66	36.41	125.01	20.74	159.71	26.62	8539.07	309.85	2163.21	559.02	3.86965	836.656
	SA02-11	32.92	0.48	141.51	4.7	52.03	43.55	22.13	97.96	19.12	152.71	38.11	132.52	22.09	166.4	27.71	8751.24	348.11	2453.7	604.77	4.05724	857.763
	SA02-12	27.85	0.453	144.6	4.54	52	43.67	22.22	99.75	20.01	154.79	38.93	134.28	22.23	170.54	28.39	9112.78	341.01	2476.5	611.65	4.04888	839.772
	SA02-13	33.18	0.404	132.56	4.06	46.71	39.65	20.63	93.07	18.94	150.66	37.53	131.32	21.24	163.96	27.59	8852.76	328.8	2354.16	590.41	3.98733	858.624
	SA02-14	26.52	0.366	129.5	4.03	44.99	37.8	20.17	89.96	17.99	144.58	36.36	125.16	20.92	160.95	26.8	8746.34	316.85	2272.84	562.52	4.04046	834.616
	SA02-15	25.01	0.418	120.88	3.67	42.3	37.15	18.92	84.91	16.94	136.77	34.81	121.67	20.38	153.97	25.85	8426.74	306.74	2158.66	541.55	3.98608	828.502
	SA02-16	31.69	0.368	132.41	4.38	46.71	39.72	20.86	90.32	18.56	146.15	37.27	130.73	21.09	163.74	27.06	8472.99	324.65	2268.22	584.28	3.88208	853.616
	SA02-17	27.26	0.338	127.47	3.94	43.75	37.86	19.66	86.56	17.81	140.14	35.84	124.6	20.68	157.58	26.08	8224.91	311.56	2180.95	554.58	3.93262	837.51
	SA02-18	25.17	0.307	123.63	3.73	43.19	37.15	19.23	85.19	17.56	139.91	35.05	122.44	20.36	156.84	25.78	8335.45	309.51	2162.96	557.96	3.87655	829.163
	SA02-19	26.58	0.343	124.53	3.71	43.66	36.93	19.25	84.1	17.46	138.71	35.2	123.19	20.35	157.77	25.81	8259.53	305.36	2122.93	552.94	3.83935	834.853
	SA02-20	25.68	0.346	127.73	3.79	45.18	38.34	20	88.42	17.81	143.15	36.32	126.95	21.19	160.94	26.35	8416.96	313.78	2180.35	563.19	3.87143	831.251
	SA02-21	26.25	0.3	127.42	3.85	44.3	38.8	20.37	86.74	17.86	143.51	36.06	128.5	21.07	164.39	26.82	8277.46	309.31	2100.06	556.55	3.77335	833.544
	SA02-22	29.8	0.394	135.72	4.27	47.61	40.04	21.3	92.58	19.21	148.82	38.18	130.78	21.88	167.51	26.95	8366.15	320.48	2207.56	579.15	3.81172	846.983
	SA02-23	28.03	0.36	129.11	3.98	44.89	38.44	20.33	87.14	18.38	141.27	36.42	126.35	20.97	162.91	26.62	8397.82	309.82	2108.65	560.73	3.76054	840.455
	SA02-24	25.57	0.338	131.41	3.85	46.13	40.01	20.3	91.19	18.4	145.56	37.77	127.56	21.64	163.97	26.5	8528.61	313.59	2171.58	566.86	3.83089	830.803
	SA02-25	30.6	0.361	130.44	3.79	45.46	39.41	20.58	92.3	18.63	145.35	37.27	126.97	21.31	166.02	27.19	8656.9	313.1	2149.41	561.23	3.82982	849.831
	SA02-26	29.19	0.325	136.57	3.93	46.31	39.74	20.86	93.22	18.92	149.99	38.7	135.67	22.27	171.49	28.49	8949.2	323.23	2242.21	586.04	3.82604	844.769
	SA02-27	28.47	0.382	134.85	4.08	46.7	39.21	21.1	91.96	18.87	152.71	38.4	134.13	22.51	169.01	27.65	8842.86	318.49	2222.21	574.85	3.86572	842.108
	SA02-28	30.57	0.519	148.66	4.6	53.33	45.04	23.13	101.39	20.59	161.1	42.14	143.96	23.5	183.13	30.18	9392.91	347.02	2432	607.92	4.00053	849.725
	SA02-29	30.11	0.399	139.87	4.02	47.92	41.71	22.15	98.69	19.87	159.94	40.42	141.21	23.47	178.3	29.43	9461.17	341.28	2340.42	609.05	3.84274	848.094
	SA02-30	30.15	0.368	143.07	4.19	50.43	42.42	22.36	99.13	19.82	160.28	41.1	141.5	23.89	180.47	29.79	9566.45	350.99	2407.48	619.94	3.88341	848.236
	SA02-31	29.81	0.42	140.44	4.07	48.12	40.84	21.75	97.73	19.3	157.34	39.73	138.81	23.53	177.28	29.75	9358.9	342.44	2354.52	612.98	3.8411	847.019
	SA02-32	33.17	0.451	136.63	4.2	46.14	40.85	20.55	94.77	18.6	151.66	38.66	132.22	21.58	170.62	27.77	9149.92	328.65	2316.57	584.52	3.9632	858.591
	SA02-33	28.61	0.394	129.98	4.09	45.95	40.1	21.06	93.1	18.79	152.36	37.45	131.97	21.9	164.92	28.25	9025.8	325.57	2277.96	577.99	3.94118	842.63
	SA02-34	28.49	0.323	131.69	3.96	46.68	39.16	21.16	92.44	18.64	149.84	37.05	130.07	21.79	165.35	27.49	9043.64	322.1	2251.46	576.04	3.90851	842.183
	SA02-35	28.4	0.449	137.81	4.37	49.26	40.29	20.94	93.35	19.24	152.27	38.98	132.94	22.23	167.78	27.78	9118.42	330.98	2338.84	588.99	3.97093	841.846
	SA02-36	31.56	0.437	139.96	4.5	51.01	41.53	22.17	96.81	19.35	154.65	39.18	134.78	21.62	169.7	28.53	8840.01	334.69	2383.18	599.96	3.97223	853.17
	SA02-37	30	0.401	132.3	3.93	46.72	39.76	20.71	91.37	18.32	147.81	37.32	129.94	21.34	163.45	27.34	8762.88	323.48	2298.38	572.06	4.01773	847.701
	SA02-38	31.57	0.364	133.62	3.92	45.97	39.79	20.79	93.05	18.61	148.21	37.7	130.4	21.52	165.04	27.67	8871.07	315.69	2287.88	587	3.89758	853.205
	SA02-39	32.24	0.346	135.3	3.96	46.87	40.52	21.13	95.97	18.39	150.09	38.34	131.33	21.96	166.79	27.85	8923.88	334.23	2382.13	594.75	4.00526	855.486
	SA02-40	31.06	0.431	137.89	4.35	47.51	41.17	21.58	94.24	19.41	153.68	38.43	134.54	22.38	171.56	27.96	8801.43	328.52	2277.74	593.42	3.83833	851.441
	SA02-41	26.66	0.349	135.2	4.09	47.27	42.22	21.46	94.39	19.18	150.12	38.4	134.55	22.64	173	28.19	8939.17	326.37	2258.03	581.27	3.88465	835.169
	SA02-42	30.28	0.402	134.49	3.98	45.38	39.84	21	93.65	18.86	149.68	37.84	134.69	22.26	172.41	27.95	8944.63	323.58	2216.58	580.7	3.81708	848.699
	SA02-43	32.65	0.709	137.13	4.43	48.71	40.19	21.42	93.41	19.16	150.93	39.12	136.49	22.2	174.85	28.87	9019.95	331.86	2251.3	596.46	3.77444	856.864
	SA02-44	29.32	0.345	143.67	4.24	50.2	43.48	22.5	100.57	19.86	159.02	40.26	140.71	23.47	180.1	29.04	9215.43	340.13	2356.37	606.07	3.88795	845.244
	SA02-45	31.44	0.457	144.93	4.31	49.66	42.59	22.09	99.71	19.73	156.67	40.05	137.88	23.08	175.3	28.38	8996.53	337.97	2335.65	610.75	3.82423	852.757
	SA02-46	28.71	0.379	140.7	4.12	47.24	41.97	22.03	95.58	19.62	155.36	39.06	137.13	22.87	174.84	28.32	9078.59	334.24	2308.99	603.87	3.82365	843.001
	SA02-47	32.55	0.419	149.25	4.49	51.53	43.69	23.41	102.63	20.46	163.26	40.9	143.24	23.72	179.58	28.9	9089.71	352.78	2427.05	635.63	3.81834	856.529
	SA02-48	31.69	0.338	139.4	4.15	47.18	42.02	21.14	95.19	19.25	153.01	39.11	135.28	22.32	171.96	28.34	8893.89	328.97	2255.32	584.71	3.85716	853.616
	SA02-49	31.27	0.396	136.02	3.96	49.27	40.42	20.81	95.19	19.16	152.18	38.79	136.58	22.64	172.16	28.96	9077.29	326.83	2284.3	593.12	3.85133	852.17
	SA02-50	32.68	0.429	148.47	4.76	53.51	44.38	23.36	101.6	20.48	160.45	40.32	141.14	23.14	177.85	28.74	8770.44	346.37	2389.21	621.82	3.84229	856.964
	SA02-51	28.67	0.418	147.87	4.67	52.54	43.28	23.06	102.66	20.69	160.08	41.13	141.47	23.37	179.49	29	8906.57	348.58	2409.43	616.69	3.90704	842.853
	SA02-52	31.36	0.336	130.65	3.88	45.27	39.84	20.96	90.89	18.54	149.13	38.06	132.85	21.92	168.75	27.92	8786.31	326.95	2216.4	578.41	3.83188	852.481
	SA02-53	28.81	0.471	128.38	3.84	44.58	38.07	19.77	89.42	18.16	144.03	36.7	129.15	21.55	164.88	27.25	8787.69	313.49	2150.81	568.4	3.78397	843.371
	SA02-54	33.22	0.408	139.28	4.08	48.57	40.39	21.85	95.02	19.47	153.79	39.11	135.37	22.52	173.59	28.64	9050.45	329.93	2286.99	596.23	3.83575	858.756
	SA02-55	29	0.387	130.54	3.96	45.78	39.55	20.78	91.86	18.49	145.72	37.63	131.72	22.12	166.04	27.36	8663.59	309.57	2140.5	563.3	3.79993	844.072
	SA02-56	30.28	0.404	133.96	3.97	46.61	41.01	21.18	93.92	18.89	149.07	38.39	133.46	21.73	169.42	27.72	8594.55	316.04	2196.41	569.87	3.85423	848.699
	Average	29.4102	0.386839	133.493	4.04768	46.7077	39.8305	20.8857	92.1995	18.6709	148.407	37.7259	131.134	21.7102	166.491	27.4729	8734.42	323.111	2251.56	579.763	3.8833	845.328
	1s	2.20425	0.0649604	7.78221	0.298143	2.95155	2.38218	1.1648	5.52195	0.976033	7.5584	1.88964	6.45933	1.12354	8.38526	1.27329	378.92	14.4718	104.257	23.3585	0.0750564	8.06266
Session 2	SA02-1	26.87	2.66	170.44	10.57	107.42	84.54	42.87	174.08	36.01	279.63	70.49	244.17	39.69	309.88	52.55	9066.12	161.66	1142.77	315.41	3.62313	835.843
(n=33)	SA02-2	18.73	2.27	163.59	9.48	96.97	79.36	41.84	173.29	35.93	288.01	74.3	258.55	43.21	335.28	56.09	9147.01	173.17	1157.15	347.97	3.32543	799.154
	SA02-3	21.13	0.171	61.5	1.29	15.8	16.26	9.04	44.65	9.72	83.07	22.53	83.68	14.44	114.39	21.08	9188.85	169.69	1011.02	355.78	2.8417	811.138
	SA02-4	19.28	2.04	163.45	7.84	82.31	70.01	37.26	157.99	33.96	271.98	69.86	245.33	41.06	320.72	54.87	9113.43	192.34	1246.57	383.88	3.24729	802.007
	SA02-5	15.58	<0.041	17.45	0.175	2.78	3.84	2.5	12.95	3.42	31.9	9.58	39.02	7.44	63.73	12.46	10131.3	31.975	93.34	79.9	1.16821	781.354
	SA02-6	16.44	0.79	65.91	3.08	33.41	32.04	18.08	82.57	18.02	156.66	43.25	164.94	29.23	239.35	43.46	9417.79	112.63	551.06	251	2.19546	786.486
	SA02-7	16.8	1.77	172.95	8.37	88.46	72.67	38.88	163.34	33.67	271.46	69.7	248.23	40.77	316.77	54.66	9157.88	187.06	1254.99	380.77	3.29593	788.57
	SA02-8	29.07	0.475	121.35	3.66	43.34	39.23	21.42	92.59	19.86	165.41	42.5	151.15	25.1	196.21	34.12	8933.61	232.36	1483.98	473.01	3.13731	844.18
	SA02-9	20.57	0.243	43.01	0.788	10.26	11.12	6.73	32.7	7.68	67.31	19.21	72.65	13.19	107.68	20.04	9851.3	108.18	533.84	244.44	2.18393	808.445
	SA02-10	17.01	0.725	63.81	2.84	32.68	29.59	17.46	78.63	17.49	154	41.83	157.67	27.84	227.71	42.36	9518.2	107.79	520.58	244.16	2.13213	789.768
	SA02-11	17.13	0.119	35.19	0.403	5.11	8.13	6.12	34.73	8.68	80.25	22.62	87.4	15.23	124.43	22.96	10002.7	102.3	506.4	228.2	2.21911	790.448
	SA02-12	15.27	<0.092	14.47	0.148	2.06	3.11	2.04	10.08	2.59	25.66	7.56	31.22	5.89	50.9	10.64	10508.5	25.218	74.09	64.65	1.14602	779.446
	SA02-13	17.6	1.62	177.96	8.48	92.36	74.27	39.81	173.85	35.63	289.65	74.65	259.57	42.97	329.28	57.03	9314.57	198.5	1312.56	393.14	3.33866	793.072
	SA02-14	20.55	1.64	153.73	7.45	82.29	71.05	37.68	165.03	34.91	282.19	73.56	264.52	44.08	342.97	58.59	9500.59	185.04	1164.15	374.88	3.10539	808.348
	SA02-15	19.23	0.983	89.67	4.32	47.16	42.45	23.68	104.9	22.73	197.42	52.06	196.6	33.63	265.06	48.08	9064.71	132.98	707.73	286.61	2.46931	801.75
	SA02-16	19.89	1.72	108.1	5.56	59.46	53.06	28.72	126	27.33	229.3	59.96	218.13	37.67	292.82	50.94	9270.9	146.34	826.54	301.37	2.74261	805.094
	SA02-17	17.07	1.67	177.48	8.71	90.79	75.15	40.62	170.75	34.8	281.71	73.19	254.78	42.59	328.29	56.63	9338.76	197.96	1295.06	389.85	3.32194	790.108
	SA02-18	33.8	0.73	171.69	5.62	64	50.54	26.35	117.25	22.77	178.71	44.73	153.25	24.67	186.41	32.22	9266.77	389.69	3191.11	699.97	4.55892	860.504
	SA02-19	25.14	2.59	199.95	11.21	118.19	88.39	45.86	186.21	36.99	291.1	72.68	250.34	41.84	313.16	53.71	9471.58	177.2	1248.25	335.99	3.71514	828.89
	SA02-20	16.18	0.054	27.32	0.404	5.8	7.58	4.52	22.71	5.75	55.69	16.24	64.38	11.83	100.27	18.94	10269.1	54.1	175.23	131.12	1.33641	784.958
	SA02-21	25.79	2.05	178.96	9.41	100.41	78.89	41.21	164.67	33.66	269.67	67.12	236.28	39.05	298.44	51.29	9428.28	169.66	1159.31	321.32	3.60796	831.546
	SA02-22	18.12	1.75	200.9	9.52	107.42	88.29	46.07	192.96	39.04	317.21	80.37	281.57	46.97	356.43	60.35	9525.01	211.58	1438.91	413.58	3.47916	795.909
	SA02-23	15.86	<0.076	20.19	0.234	3.67	5.28	3.22	18.06	4.73	43.84	13.25	52.12	9.41	78.85	15.51	9949.78	49.1	169.91	119.46	1.42232	783.05
	SA02-24	23.27	1.94	159.1	8.78	95.15	75.39	40.21	167.4	33.59	270.82	67.92	233.54	39.6	300.79	51.12	9319.52	155.86	1082	308.68	3.50525	820.922
	SA02-25	15	<0.068	19.35	0.28	3.26	4.58	3.14	17.78	4.63	45.62	13.66	55.84	10.56	86.33	16.73	9975	56.78	195.49	139.18	1.40458	777.759
	SA02-26	16.24	1.89	156.45	7.73	84	66.75	36.1	150.36	31.7	257.78	65.85	231.2	39.4	301.51	52.77	8887.82	173.8	1127.42	350.6	3.21569	785.313
	SA02-27	17.87	1.13	101.92	4.82	54.14	47.97	26.77	117.53	25.51	218.79	57.28	211.82	36.57	283.51	51.12	9257.09	146.5	816.86	312.12	2.61713	794.553
	SA02-28	25.71	0.364	95.73	2.48	29.68	27.36	15.75	71.11	15.37	127.24	33.25	122.13	20.61	160.91	28.6	9025.52	201.59	1282.07	416.94	3.07495	831.222
	SA02-29	19.79	1.23	120.21	5.78	64.45	55.89	30.64	133.74	28.6	236.79	61.69	222.18	37.53	294.29	51.64	8957.98	153.1	924.41	329.08	2.80907	804.593
	SA02-30	16.63	0.725	60.39	2.63	29.73	27.63	16.32	73.89	16.2	141.66	39.3	148.49	26.58	213.01	40.1	9323.27	102.2	496.35	237.71	2.08805	787.59
	SA02-31	17.32	0.923	70.97	3.29	37.73	33.94	19.54	85.41	18.85	165.69	45.02	170.1	29.96	235.75	43.49	8958.18	116.52	586	260.49	2.24961	791.515
	SA02-32	19.1	2.84	172.2	9.97	105.44	81.67	44.58	182.89	37.22	301.24	74.16	262.21	43.2	326.91	56.93	8843.18	177.53	1230.4	349.75	3.51794	801.08
	SA02-33	19.06	3	185.81	9.76	104.32	83.74	43.88	181.56	36.41	298.57	74.81	257.67	42.81	324.72	56.26	8766.38	189.83	1317	371.92	3.54108	800.874
	Average	19.7909	1.38317	113.37	5.30552	57.5773	48.1748	26.0276	111.565	23.4379	193.213	50.1267	179.719	30.443	237.175	41.7376	9386.38	151.219	949.168	309.483	2.77687	802.894
	1s	4.34115	0.846018	61.6396	3.64847	38.1502	29.2283	15.0575	60.6326	12.0218	93.8956	23.0951	78.3823	12.7311	95.3132	15.7472	427.539	68.1617	578.305	120.391	0.832653	19.9292

## Sheet: Table S2_CA-ID-TIMS U-Pb
Table S2. NIGL CA-ID-TIMS U-Pb Results
					Ratios										Ages (Ma)
Sample	Pb(c)	Pb*	U	Th	206 Pb	208 Pb	206 Pb	206 Pb		207 Pb		207 Pb			206 Pb		207 Pb		207 Pb		corr.
Fractions	(pg)	Pb(c)	(pg)	U	204 Pb	206 Pb	238 U	238 U	err	235 U	err	206 Pb	err		238 U	err	235 U	err	206 Pb	err	coef.
(a)	(b)		(c)		(d)	(e)	(e)	(ef)	(2σ%)	(e)	(2σ%)	(ef)	(2σ%)		(ef)	(2σ)	(e)	(2σ)	(ef)	(2σ)
SA02 (chemically abraded)
z2	0.201462	2399.26	3195.29	3.11154	86014.5	0.965976	0.0865713	0.0865695	0.0987512	0.695645	0.180976	0.0583065	0.128616		535.216	0.507187	536.187	0.753883	540.316	2.90206	0.698424
z3	0.248805	1041.2	1596.57	3.58583	34795.9	1.1132	0.0865336	0.0865288	0.0295405	0.695434	0.0558053	0.0583162	0.0376846		534.975	0.151655	536.06	0.232424	540.677	1.09043	0.477484
Notes
(a) All analyses are fragments of a zircon megacryst. Data used in date calculation are in bold.
(b) Total common-Pb in analyses.
(c) Total sample U.
(d) Measured ratio corrected for spike and fractionation only.
(e) Measured ratios corrected for fractionation, tracer and blank.
(f) Corrected for initial Th/U disequilibrium using radiogenic 208Pb and Th/U[magma] = 2.8.
All common Pb assumed to be laboratory blank.
Blank isotopic composition: 206Pb/204Pb = 18.10 ± 0.27, 207Pb/204Pb =15.54 ± 0.14, 208Pb/204Pb = 37.82 ± 0.41.
Corr. coef. = correlation coefficient.
Ages calculated using the decay constants λ238 = 1.55125E-10 y-1 and λ235 = 9.8485E-10 y-1 (Jaffey et al. 1971).
238U/235U ratio of sample is predicted at 137.818 ± 0.045 (Hiess et al., 2012).

## Sheet: Table S3_ID-TIMS U-Pb
Table S3. TJCGS ID-TIMS U-Pb Results
Sample	No.	Content(ppm)		Isotope Ratio								Age (Ma)						Rho(6/8-7/5)
		Pb	U	206Pb/204Pb	Err%	207Pb/235U	Err%	206Pb/238U	Err%	207Pb/206Pb	Err%	206Pb/238U	1σ	207Pb/235U	1σ	207Pb/206Pb	1σ
SA02	1	456.25	2867.1	337.88	0.04	0.685966	0.25	0.0857867	0.22	0.0579938	0.113	530.571	1.16726	530.374	1.32593	529.528	0.598366	0.89232
	2	71.89	482.46	581.37	0.13	0.68713	0.267	0.0858641	0.119	0.0580398	0.228	531.03	0.631926	531.075	1.41797	531.265	1.21128	0.52575
	3	215.6	1447.4	1725.41	0.25	0.692816	0.185	0.0863186	0.141	0.0582119	0.132	533.728	0.752556	534.491	0.988808	537.746	0.709825	0.73386
	4	538.63	3363.4	878.8	0.08	0.695553	0.252	0.0867223	0.244	0.0581699	0.0616	536.123	1.30814	536.131	1.35105	536.167	0.330279	0.969704
	5	245.72	1645.4	435.84	0.17	0.693294	0.301	0.0863648	0.232	0.058221	0.186	534.002	1.23888	534.778	1.60968	538.088	1.00084	0.78622
	6	369.09	2592.2	904.26	0.2	0.692415	0.346	0.0863662	0.242	0.0581461	0.246	534.01	1.29231	534.25	1.84851	535.271	1.31677	0.70259
	7	262.3	1878.4	1410.66	0.15	0.695622	0.129	0.0866163	0.0884	0.0582469	0.0919	535.494	0.473377	536.173	0.691663	539.061	0.495397	0.86988
	8	156.23	1222.2	775.9	0.07	0.693166	0.14	0.0864912	0.0947	0.0581252	0.0985	534.752	0.50641	534.701	0.748581	534.484	0.526467	0.4578

## Sheet: Table S4_SIMS U-Pb
Table S4. SIMS U-Pb Results
Sample/	207Pb	±s	207Pb	±s	206Pb	±s	Rho	207Pb	±s	207Pb	±s	206Pb	±s	[U]	[Th]	Th/U	206Pb/204Pb
spot #	206Pb	%	235U	%	238U	%		206Pb		235U		238U		μg g-1	μg g-1		measured
SA02 Zircon
SA02@1	0.05829	0.93	0.696543	1.83816	0.086713	1.58265	0.860997	540.497	20.3157	536.724	7.63419	536.068	8.14605	202.146	279.992	1.3851	23507.3
SA02@2	0.05819	0.64	0.701902	1.70898	0.0875297	1.58603	0.928059	536.756	13.8678	539.926	7.13152	540.911	8.2342	442.19	1481.46	3.35028	129656
SA02@3	0.05758	0.74	0.69029	1.67641	0.0869894	1.50608	0.898394	513.757	16.0938	532.975	6.92786	537.707	7.77443	329.472	635.408	1.92856	62787.8
SA02@4	0.05757	1.17	0.693677	1.90901	0.0874235	1.51131	0.791674	513.57	25.42	535.007	7.90811	540.282	7.8373	130.706	150.808	1.1538	38341.8
SA02@5	0.05846	0.76	0.697269	1.72707	0.0861871	1.553	0.89921	547.088	16.4216	537.158	7.17883	532.947	7.94867	424.375	983.444	2.31739	60376
SA02@6	0.05827	1.26	0.693695	1.95688	0.0859678	1.50043	0.766748	539.984	27.2408	535.018	8.10573	531.646	7.66146	180.771	299.25	1.65541	52205.4
SA02@7	0.0582	0.58	0.696397	1.69213	0.0868209	1.59027	0.939803	537.318	12.6025	536.637	7.02894	536.708	8.19467	530.49	1593.65	3.00412	>1e6
SA02@8	0.05885	0.8	0.708535	1.7564	0.0866764	1.56423	0.890585	561.661	17.3131	543.876	7.36911	535.851	8.04804	334.432	686.464	2.05263	31533.4
SA02@9	0.05826	1.19	0.692669	1.94019	0.0862658	1.52906	0.788097	539.608	25.9105	534.403	8.0299	533.415	7.83266	184.228	262.845	1.42674	20721.1
SA02@10	0.05794	0.67	0.689242	1.672	0.0863139	1.53302	0.916879	527.528	14.5613	532.345	6.90349	533.7	7.85699	403.805	927.255	2.29629	>1e6
SA02@11	0.05788	0.96	0.685156	1.83164	0.0858906	1.55997	0.851683	525.268	20.9089	529.886	7.53366	531.188	7.95908	322.101	643.976	1.9993	>1e6
SA02@12	0.05855	0.8	0.693132	1.70497	0.0858965	1.50392	0.88208	550.444	17.4402	534.681	7.06252	531.222	7.67339	275.716	539.583	1.95702	>1e6
SA02@13	0.05819	1.1	0.694435	1.90157	0.0864194	1.55222	0.816285	536.869	23.8576	535.462	7.88245	534.326	7.9644	423.015	1004.57	2.37477	123604
SA02@14	0.0582	0.61	0.692556	1.67125	0.0858677	1.55623	0.931175	537.13	13.2771	534.335	6.91995	531.052	7.93801	544.917	1684	3.09037	44538.3
SA02@15	0.05935	0.48	0.702088	1.65032	0.0858317	1.57871	0.956607	580.045	10.4121	540.038	6.88865	530.838	8.04965	757.193	2962.68	3.91272	>1e6
SA02@16	0.05817	1.14	0.689892	1.88696	0.0860619	1.50076	0.795331	535.995	24.8394	532.736	7.79198	532.204	7.67086	151.47	215.4	1.42206	>1e6
SA02@17	0.05964	0.98	0.705342	1.85293	0.0858199	1.57403	0.849483	590.38	21.0606	541.977	7.75207	530.768	8.02475	183.728	327.341	1.78166	>1e6
SA02@18	0.05795	0.76	0.686665	1.7157	0.0859711	1.53598	0.895254	528.037	16.6659	530.795	7.06764	531.666	7.84339	304.62	488.993	1.60525	57469.4
SA02@19	0.05869	1.22	0.703778	1.97909	0.0863854	1.55878	0.787622	555.504	26.3807	541.045	8.26703	534.124	7.99517	138.147	197.321	1.42835	34039
SA02@20	0.05786	0.88	0.685974	1.75244	0.0860266	1.51679	0.865529	524.418	19.1327	530.379	7.21416	531.995	7.74989	229.043	424.804	1.85469	43945.3
SA02@21	0.05811	0.71	0.690735	1.68738	0.085953	1.52904	0.906165	533.934	15.5481	533.242	6.97566	531.558	7.8064	373.265	1062.81	2.84733	72850.4
SA02@22	0.05791	0.69	0.679761	1.71079	0.0851757	1.56753	0.916264	526.265	14.9531	526.63	7.00544	526.942	7.93629	379.832	1104.12	2.90687	111395
SA02@23	0.05768	0.94	0.695668	1.85904	0.0875191	1.60225	0.861873	517.466	20.5656	536.2	7.71487	540.848	8.31756	272.414	497.143	1.82495	>1e6
SA02@24	0.0583	0.54	0.691782	1.64758	0.0861006	1.55675	0.944871	540.996	11.7539	533.871	6.81779	532.434	7.96054	807.081	3235.02	4.00829	>1e6
SA02@25	0.05852	0.63	0.699231	1.65161	0.0863571	1.52784	0.925065	549.203	13.6397	538.332	6.87754	533.957	7.83406	546.525	1646.22	3.01215	62269.7
SA02@26	0.05758	1.09	0.694034	1.94984	0.0874611	1.61848	0.830056	513.757	23.7121	535.221	8.07902	540.504	8.39669	146.123	216.007	1.47826	>1e6
SA02@27	0.05857	0.6	0.701925	1.62892	0.0868048	1.51272	0.928661	551.296	13.1353	539.94	6.79871	536.613	7.79348	489.795	1338.58	2.73293	146128
SA02@28	0.058	0.6	0.686184	1.62184	0.0855652	1.50538	0.928196	529.801	13.1671	530.505	6.67949	529.255	7.65356	519.415	1398.29	2.69204	77554
SA02@29	0.05787	0.65	0.686781	1.66976	0.085707	1.53989	0.922222	524.747	14.095	530.865	6.87974	530.097	7.84108	549.35	1608	2.9271	52822
SA02@30	0.05764	0.59	0.687551	1.65293	0.0865569	1.54479	0.934581	515.969	12.8617	531.328	6.81511	535.142	7.93789	506.592	1437.78	2.83814	98270.8
SA02@31	0.05781	0.77	0.693862	1.77072	0.0861644	1.59645	0.90158	522.45	16.7164	535.118	7.33845	532.813	8.16921	565.954	1803.24	3.1862	23329.6
SA02@32	0.05864	1.14	0.695535	1.91108	0.0860675	1.53428	0.802835	553.656	24.67	536.121	7.92909	532.237	7.84276	130.829	158.159	1.2089	>1e6
SA02@33	0.0583	0.8	0.697692	1.73933	0.0867076	1.54591	0.888798	540.909	17.3369	537.411	7.23218	536.036	7.9564	557.159	1967.65	3.53157	163802
SA02@34	0.05811	0.6	0.691436	1.62509	0.0863428	1.50864	0.928343	533.756	13.1716	533.663	6.72303	533.871	7.73435	476.28	1265.24	2.6565	68705
SA02@35	0.05865	0.71	0.691319	1.72209	0.0855306	1.57002	0.911693	554.043	15.3639	533.593	7.12221	529.05	7.97941	344.704	697.752	2.0242	>1e6
SA02@36	0.05833	0.55	0.695027	1.63434	0.0861645	1.5373	0.940624	542.023	12.0836	535.817	6.78181	532.814	7.86636	602.845	1623.39	2.69289	71732.5
SA02@37	0.05866	1	0.690505	1.85751	0.0854112	1.56667	0.843425	554.518	21.6249	533.104	7.67482	528.341	7.95214	295.695	549.099	1.85698	>1e6
SA02@38	0.05874	0.97	0.695085	1.81394	0.0858586	1.53349	0.845393	557.544	20.9892	535.851	7.5247	530.997	7.82121	183.999	231.346	1.25732	>1e6
SA02@39	0.05832	0.84	0.690209	1.75374	0.0858798	1.53776	0.876846	541.631	18.3298	532.926	7.24579	531.124	7.84479	244.482	434.632	1.77777	>1e6
SA02@40	0.05828	0.58	0.688781	1.63584	0.0857509	1.529	0.934688	540.388	12.6667	532.068	6.75204	530.358	7.78928	513.58	1668.23	3.24824	>1e6
SA02@41	0.05855	0.62	0.698946	1.65085	0.0863962	1.52999	0.926791	550.283	13.4798	538.161	6.87276	534.188	7.84835	475.552	1665.97	3.50322	94407.9
SA02@42	0.05817	0.47	0.689532	1.61111	0.0860034	1.54203	0.957119	536.339	10.1817	532.519	6.65456	531.857	7.87698	791.882	2792.65	3.5266	>1e6
SA02@43	0.05822	0.93	0.693253	1.80761	0.0864061	1.55261	0.858929	537.895	20.1251	534.753	7.48691	534.247	7.96528	503.42	1520.45	3.02024	>1e6
SA02@44	0.05824	0.57	0.688232	1.61305	0.085621	1.50732	0.934453	538.667	12.5161	531.737	6.65513	529.587	7.66804	544.234	1514.05	2.78198	165680
SA02@45	0.05834	0.88	0.691369	1.84149	0.0857418	1.61501	0.877011	542.427	19.2268	533.623	7.61452	530.304	8.22691	429.358	1328.69	3.09459	85086.4
SA02@46	0.05767	0.58	0.685209	1.6217	0.0862051	1.51516	0.934304	517.42	12.6423	529.918	6.67333	533.055	7.7564	525.644	1716.43	3.26539	154515
SA02@47	0.0584	0.46	0.69934	1.56975	0.0867995	1.50062	0.955963	544.951	10.036	538.397	6.53837	536.581	7.73068	828.31	3075.55	3.71304	255367
SA02@48	0.05817	0.45	0.69357	1.61262	0.0864275	1.54805	0.959957	536.241	9.85654	534.943	6.68373	534.374	7.94366	870.505	3348.09	3.84614	258666
SA02@49	0.05808	0.58	0.688077	1.67142	0.085955	1.5674	0.937768	532.95	12.6593	531.645	6.89422	531.57	8.00254	513.924	1446.4	2.81442	>1e6
SA02@50	0.0584	0.7	0.693382	1.68363	0.0858683	1.53073	0.909186	544.809	15.247	534.83	6.97592	531.055	7.80795	392.644	900.223	2.29272	76056.8
SA02@51	0.05864	0.76	0.695511	1.77662	0.0860677	1.60639	0.904181	553.572	16.474	536.106	7.3731	532.239	8.21161	296.324	547.022	1.84603	>1e6
SA02@52	0.0572	1.27	0.67453	1.97341	0.0855666	1.51051	0.765427	499.226	27.727	523.463	8.03963	529.264	7.67975	110.226	126.308	1.14591	16224.3
SA02@53	0.0592	0.84	0.700862	1.78482	0.0859041	1.57403	0.881898	574.414	18.1918	539.306	7.44037	531.268	8.03199	294.524	565.697	1.92071	>1e6
SA02@54	0.05824	0.45	0.690402	1.58541	0.0860186	1.51907	0.958157	538.711	9.89679	533.042	6.55362	531.948	7.76093	842.937	2992.84	3.55049	>1e6
SA02@55	0.05803	0.69	0.686131	1.71553	0.0856109	1.56932	0.914769	530.862	15.1093	530.473	7.06371	529.527	7.98275	402.905	1119.84	2.77941	117414
SA02@56	0.05832	1.65	0.696868	2.23973	0.0867052	1.51751	0.677539	541.712	35.6167	536.918	9.29692	536.022	7.8099	63.0573	61.7612	0.979446	>1e6
SA02@57	0.05853	0.65	0.693782	1.67879	0.0856943	1.54976	0.923142	549.546	14.0314	535.07	6.9583	530.022	7.8903	458.387	1208.69	2.63683	66907.2
								539.232	32.3838			532.995	6.21696
Zircon reference material
Qinghu Zircon
Qinghu-1	0.04886	0.73	0.17079	1.68	0.0254	1.51	0.90182	141.3	16.9	160.1	2.5	161.4	2.4	1562	596	0.381	63998
Qinghu-2	0.05003	0.76	0.173	1.69	0.0251	1.51	0.89218	196.4	17.6	162	2.5	159.7	2.4	1693	658	0.389	29228
Qinghu-3	0.04907	1.02	0.16856	1.85	0.0249	1.54	0.83449	151.3	23.7	158.2	2.7	158.6	2.4	1498	574	0.383	124442
Qinghu-4	0.04923	0.89	0.17113	1.77	0.0252	1.53	0.86388	158.8	20.8	160.4	2.6	160.5	2.4	1388	556	0.4	>1e6
Qinghu-5	0.04971	0.96	0.16934	1.82	0.0247	1.55	0.85045	181.4	22.1	158.8	2.7	157.3	2.4	1165	549	0.472	>1e6
Qinghu-6	0.04876	0.97	0.16668	1.89	0.0248	1.63	0.85878	136.3	22.6	156.5	2.8	157.9	2.5	754	314	0.416	>1e6
Qinghu-7	0.04956	0.9	0.16874	1.92	0.0247	1.7	0.88364	174.2	20.9	158.3	2.8	157.3	2.6	1038	357	0.344	>1e6
												158.957	2.98923
Qinghu
Qinghu-1	0.0495406	2.08971	0.170795	2.58151	0.0250042	1.51569	0.587132	173.497	48.0501	160.109	3.83105	159.205	2.38394	984.983	439.325	0.446023	1049.73
Qinghu-2	0.0489575	0.645481	0.168911	1.63703	0.0250228	1.5044	0.918982	145.795	15.0701	158.473	2.40479	159.322	2.36791	1411.42	826.834	0.585815	46138.2
Qinghu-3	0.0495548	0.585478	0.171329	1.61514	0.0250751	1.50529	0.931987	174.163	13.6039	160.571	2.40163	159.651	2.37414	1498.1	651.131	0.434636	214556
Qinghu-4	0.0491819	0.741523	0.170886	1.71228	0.0252	1.54338	0.901364	156.51	17.2665	160.188	2.54061	160.436	2.44605	1100.9	697.865	0.633903	251631
Qinghu-5	0.0489564	0.520165	0.17158	1.59083	0.0254189	1.50339	0.945032	145.745	12.1553	160.789	2.3684	161.813	2.40284	1754.18	867.085	0.494297	274542
Qinghu-6	0.0494141	0.604819	0.17058	1.6222	0.0250366	1.50524	0.927896	167.527	14.0685	159.922	2.40312	159.409	2.37049	1374.69	650.967	0.473539	138902
Qinghu-7	0.0495961	0.63058	0.172158	1.62895	0.0251756	1.50195	0.922034	176.107	14.642	161.29	2.4322	160.283	2.37812	1338.65	630.569	0.471049	54956.2
Qinghu-8	0.0499542	0.679327	0.172591	1.65303	0.025058	1.50699	0.911654	192.861	15.7203	161.665	2.4735	159.543	2.37524	994.926	432.596	0.434802	85010
Qinghu-9	0.0497568	0.708137	0.171629	1.6882	0.0250171	1.5325	0.907772	183.648	16.4112	160.832	2.51415	159.286	2.4116	1755.63	755.422	0.430285	32875.9
Qinghu-10	0.0496212	1.39977	0.172252	2.05909	0.0251765	1.51013	0.733397	177.289	32.3195	161.372	3.07685	160.289	2.39117	888.746	414.545	0.466438	17474.3
Qinghu-11	0.0494769	0.808757	0.173184	1.70434	0.0253866	1.50022	0.88024	170.494	18.7748	162.179	2.55785	161.61	2.39481	1702.63	879.463	0.516533	17705.2
Qinghu-12	0.049694	0.932862	0.171909	1.82837	0.0250895	1.57249	0.860047	180.707	21.5965	161.074	2.72698	159.742	2.48153	1426.31	800.303	0.561099	14652.7
Qinghu-13	0.0488782	1.06123	0.166841	1.97507	0.0247563	1.66573	0.843381	141.991	24.7209	156.674	2.87155	157.646	2.59464	2374.69	1445.66	0.60878	5373.18
Qinghu-14	0.049009	1.01932	0.167708	1.84126	0.0248185	1.53337	0.832784	148.263	23.7242	157.428	2.68868	158.037	2.39428	1774.15	818.171	0.461163	16601.3
Qinghu-15	0.0491302	0.525612	0.172219	1.59223	0.0254232	1.50297	0.943942	154.051	12.2633	161.343	2.37802	161.84	2.40257	3706.02	758.945	0.204787	63678.4
Qinghu-16	0.0487281	0.817416	0.168654	1.74952	0.0251025	1.54682	0.88414	134.767	19.0997	158.25	2.5669	159.823	2.44225	914.833	428.187	0.468049	21603.3
Qinghu-17	0.0492609	0.669203	0.170606	1.66807	0.0251183	1.52795	0.915997	160.267	15.5798	159.944	2.47147	159.923	2.41392	839.358	329.201	0.392206	>1000000
Qinghu-18	0.049189	1.20358	0.166665	1.9612	0.024574	1.54845	0.789544	156.85	27.9322	156.521	2.84879	156.499	2.39459	1105.96	406.351	0.367419	20171.7
Qinghu-19	0.0489327	0.633536	0.169855	1.7343	0.0251755	1.61445	0.930891	144.61	14.7957	159.293	2.56005	160.283	2.55628	924.211	444.589	0.481047	109832
Qinghu-20	0.0492546	0.555719	0.17091	1.64108	0.0251663	1.54413	0.94092	159.969	12.9489	160.208	2.43514	160.224	2.44404	1222.04	444.587	0.363808	101976
Qinghu-21	0.0491853	0.679279	0.16929	1.69653	0.0249629	1.55461	0.916344	156.675	15.8236	158.803	2.4971	158.945	2.44122	820.532	321.464	0.391775	>1000000
Qinghu-22	0.0499006	0.713496	0.172174	1.74247	0.0250243	1.58969	0.912322	190.365	16.5145	161.304	2.60212	159.332	2.50232	733.431	291.88	0.397965	>1000000

## Sheet: Table S5_LA-ICP-MS U-Pb
Table S5. LA-ICP-MS U-Pb Results
SA02 Zircon
Analysis	Radiogenic Isotope Ratios						Rho	Isotopic Ages
	207Pb/206Pb	1s	207Pb/235U	1s	206Pb/238U	1s		207Pb/206Pb	1s	207Pb/235U	1s	206Pb/238U	1s
NWU (n=25)
SA02-1	0.059611	0.0013993	0.711586	0.0163578	0.0865701	0.000899042	0.451768	590.77	49.99	545.688	9.7112	535.22	5.34167
SA02-2	0.0593862	0.00221474	0.696517	0.025314	0.0851742	0.00111692	0.360816	588.915	81.4675	536.709	15.1551	526.933	6.64111
SA02-3	0.0588119	0.00121095	0.698451	0.0135771	0.0861325	0.000826938	0.493893	561.145	41.6575	537.865	8.12504	532.624	4.91646
SA02-4	0.0585032	0.0014185	0.692069	0.0178192	0.0854559	0.00078882	0.358506	550.035	58.3225	534.043	10.6992	528.606	4.69341
SA02-5	0.0586421	0.00152259	0.702458	0.0172114	0.0869239	0.00095015	0.446124	553.74	57.3975	540.258	10.2719	537.319	5.64269
SA02-6	0.0570214	0.00176312	0.676487	0.0195125	0.086142	0.000958252	0.385665	500.04	66.66	524.649	11.8234	532.68	5.69463
SA02-7	0.05741	0.00131882	0.681578	0.0157602	0.0859037	0.000902104	0.454148	505.595	54.625	527.728	9.52321	531.266	5.36297
SA02-8	0.0567458	0.00205416	0.691448	0.0206581	0.0857393	0.0013416	0.523734	483.375	81.4725	533.67	12.4065	530.289	7.97069
SA02-9	0.0578295	0.00156422	0.711234	0.0155816	0.0874047	0.00092669	0.48395	524.11	61.1025	545.479	9.25299	540.17	5.50139
SA02-10	0.0593066	0.00143626	0.703602	0.0160167	0.0859578	0.000902388	0.461172	588.915	53.695	540.94	9.55336	531.586	5.3644
SA02-11	0.0586872	0.00239449	0.703172	0.0237263	0.0857653	0.00109016	0.376713	553.74	88.875	540.684	14.1497	530.444	6.47884
SA02-12	0.0589043	0.00303117	0.68523	0.0321808	0.0855746	0.00136243	0.339006	564.85	108.317	529.93	19.3929	529.311	8.09548
SA02-13	0.0584617	0.00351837	0.683164	0.0393807	0.0855365	0.00135373	0.274552	546.33	131.463	528.685	23.7594	529.085	8.04417
SA02-14	0.0585586	0.00129407	0.692119	0.0153604	0.0858649	0.000944838	0.495816	550.035	48.14	534.073	9.2244	531.035	5.61651
SA02-15	0.0595181	0.00161276	0.708033	0.0182439	0.0867009	0.00100524	0.449969	587.065	57.3975	543.578	10.8519	535.996	5.97022
SA02-16	0.0589554	0.00143152	0.707262	0.0176156	0.0870879	0.000806563	0.371845	564.85	47.2125	543.119	10.4833	538.292	4.79173
SA02-17	0.0576523	0.00164964	0.691702	0.0204541	0.08711	0.00100468	0.390032	516.705	67.5825	533.822	12.2822	538.423	5.96472
SA02-18	0.0597765	0.00390127	0.701577	0.0414763	0.0870923	0.00158516	0.307871	594.47	137.945	539.732	24.7529	538.318	9.40442
SA02-19	0.0585919	0.00135195	0.697212	0.0177253	0.08633	0.00104364	0.47551	553.74	54.62	537.124	10.6107	533.796	6.19978
SA02-20	0.0584894	0.00152154	0.694624	0.018672	0.0861184	0.000925455	0.399778	546.33	52.7675	535.575	11.1938	532.54	5.50036
SA02-21	0.0584485	0.00108449	0.691715	0.0139975	0.0856971	0.00085146	0.490993	546.33	40.735	533.83	8.40925	530.039	5.06371
SA02-22	0.0580351	0.00181224	0.684837	0.0207761	0.0857542	0.000954245	0.366798	531.52	68.5075	529.693	12.5261	530.378	5.67284
SA02-23	0.0589157	0.00119828	0.700218	0.0150784	0.0859754	0.0008159	0.440698	564.85	44.435	538.921	9.01238	531.691	4.85173
SA02-24	0.0572621	0.00136515	0.683771	0.0176186	0.0862781	0.000902856	0.406123	501.89	49.07	529.051	10.6308	533.488	5.36565
SA02-25	0.0581974	0.00159359	0.688937	0.0188014	0.0857468	0.00091467	0.390873	538.925	59.25	532.161	11.3091	530.334	5.43822
CUG (Wuhan) (n=34)
SA02-1	0.0563961	0.00128484	0.672741	0.0159905	0.0861566	0.00073724	0.360003	477.82	49.995	522.378	9.71301	532.766	4.38502
SA02-2	0.056039	0.00118595	0.671747	0.0145598	0.0866302	0.000747201	0.39794	453.75	48.1425	521.774	8.85043	535.577	4.44218
SA02-3	0.0569496	0.00114735	0.677818	0.0142859	0.0859413	0.000659622	0.364166	500.04	72.2125	525.454	8.65293	531.488	3.92618
SA02-4	0.0582238	0.00130611	0.695619	0.0158712	0.0864588	0.000747648	0.37901	538.925	49.9925	536.171	9.51108	534.56	4.44549
SA02-5	0.059056	0.00140532	0.699593	0.0169969	0.0857785	0.000820731	0.39382	568.55	51.8425	538.548	10.161	530.522	4.8812
SA02-6	0.0569513	0.00110874	0.684316	0.014546	0.0865654	0.000761377	0.413778	500.04	37.96	529.379	8.7764	535.192	4.52636
SA02-7	0.058348	0.00132181	0.691814	0.015355	0.0853642	0.000748996	0.395314	542.63	45.365	533.89	9.22284	528.062	4.45772
SA02-8	0.0595842	0.00137145	0.710264	0.0160425	0.0864956	0.000757396	0.387682	587.065	49.99	544.903	9.53166	534.778	4.50306
SA02-9	0.0573015	0.00147264	0.689549	0.0181724	0.0868984	0.000763351	0.333323	501.89	55.55	532.529	10.9272	537.168	4.53673
SA02-10	0.0592823	0.00156392	0.708199	0.0188271	0.0864744	0.000836532	0.363888	575.96	57.395	543.676	11.1972	534.652	4.97181
SA02-11	0.0580883	0.00150726	0.695907	0.0179392	0.0868019	0.00078978	0.352959	531.52	57.4	536.343	10.7469	536.595	4.69357
SA02-12	0.058416	0.0013386	0.698461	0.0167653	0.0862965	0.000832998	0.402144	546.33	49.9925	537.871	10.0294	533.597	4.95166
SA02-13	0.0563475	0.00218186	0.674481	0.0254869	0.0870939	0.000861349	0.261725	464.86	80.5475	523.433	15.459	538.327	5.11602
SA02-14	0.059469	0.0015044	0.709365	0.0180927	0.0863808	0.000788742	0.358	583.36	55.545	544.369	10.7537	534.097	4.68915
SA02-15	0.0578728	0.00173357	0.691843	0.0213742	0.0863699	0.000824321	0.308924	524.11	66.66	533.907	12.8331	534.033	4.89993
SA02-16	0.0575747	0.00239108	0.684349	0.0287562	0.0863473	0.000978777	0.269762	522.26	95.355	529.4	17.339	533.898	5.81524
SA02-17	0.057194	0.00238743	0.687202	0.0300939	0.0864435	0.000934076	0.246749	498.19	90.73	531.118	18.1146	534.469	5.54985
SA02-18	0.0582744	0.00165794	0.696893	0.0204811	0.0866941	0.000842627	0.330719	538.925	67.58	536.934	12.2608	535.956	5.00695
SA02-19	0.0570345	0.00198102	0.661321	0.0241711	0.0839526	0.00111619	0.363765	494.485	77.77	515.422	14.7773	519.673	6.64408
SA02-20	0.0593038	0.00244791	0.686005	0.0278674	0.0844994	0.000947417	0.276006	588.915	88.875	530.397	16.7868	522.923	5.63866
SA02-21	0.0582629	0.00131933	0.697319	0.0157817	0.0868826	0.000662502	0.336925	538.925	43.5125	537.188	9.44809	537.074	3.94005
SA02-22	0.0574555	0.00143321	0.687072	0.0171997	0.0869239	0.00078009	0.358497	509.3	53.6975	531.04	10.3581	537.319	4.63571
SA02-23	0.0566297	0.00116607	0.6738	0.0142487	0.0862111	0.000760503	0.417152	475.97	44.44	523.02	8.65103	533.09	4.52258
SA02-24	0.0581804	0.00125703	0.695443	0.0154712	0.0865606	0.000726025	0.377025	600.025	48.14	536.065	9.27269	535.164	4.31709
SA02-25	0.0581876	0.00119301	0.701782	0.0151584	0.0871031	0.000721718	0.383604	600.025	44.4375	539.855	9.05183	538.382	4.28958
SA02-26	0.0560234	0.00112477	0.681142	0.0138717	0.0878952	0.000668285	0.373341	453.75	44.44	527.465	8.38594	543.077	3.97082
SA02-27	0.0577221	0.00131095	0.68845	0.0155657	0.0863477	0.000767852	0.393307	520.41	45.365	531.869	9.36771	533.9	4.56557
SA02-28	0.0564508	0.00145168	0.672686	0.0174904	0.086126	0.000696393	0.310981	477.82	57.4025	522.344	10.6232	532.585	4.14325
SA02-29	0.0568804	0.00166077	0.68505	0.0202789	0.0869325	0.000777131	0.301988	487.08	64.8075	529.822	12.225	537.37	4.61816
SA02-30	0.0563767	0.00155472	0.668466	0.0183305	0.0857166	0.000787688	0.335115	477.82	61.105	519.779	11.1611	530.154	4.68563
SA02-31	0.0584385	0.00228524	0.686917	0.0261229	0.0857398	0.000891041	0.273274	546.33	85.1725	530.946	15.728	530.292	5.29817
SA02-32	0.0578678	0.00309433	0.687474	0.0372606	0.0859863	0.00109825	0.235657	524.11	86.0975	531.282	22.4233	531.756	6.52555
SA02-33	0.0595118	0.00122763	0.716851	0.0149385	0.087194	0.000752727	0.41426	587.065	46.2875	548.806	8.84284	538.92	4.4727
SA02-34	0.0580161	0.0012644	0.693308	0.0159477	0.0862689	0.00075729	0.381625	531.52	46.2925	534.786	9.56984	533.433	4.50332
IGGCAS (n=42)
SA02 01	0.0585899	0.00112904	0.699551	0.0141908	0.0865879	0.00110627	0.629822	553.74	42.585	538.523	8.48609	535.326	6.56957
SA02 02	0.0590625	0.000993003	0.718267	0.0130692	0.0879444	0.00097107	0.606845	568.55	37.0275	549.643	7.7321	543.368	5.76137
SA02 03	0.0581356	0.00126996	0.687228	0.0143599	0.0856364	0.00123773	0.691698	600.025	48.14	531.134	8.64942	529.678	7.3551
SA02 04	0.0578311	0.00102827	0.694301	0.0130161	0.0868271	0.00104132	0.639728	524.11	38.885	535.381	7.80894	536.744	6.18327
SA02 05	0.0582301	0.00111277	0.695835	0.0127409	0.0865739	0.00107113	0.675711	538.925	47.215	536.3	7.63735	535.243	6.36137
SA02 06	0.0578642	0.00106722	0.687696	0.0131984	0.0859185	0.00100822	0.611422	524.11	40.7375	531.415	7.94889	531.353	5.99201
SA02 07	0.0575136	0.00107671	0.698356	0.0143236	0.0875598	0.000990637	0.551613	522.26	37.96	537.809	8.57135	541.089	5.87918
SA02 08	0.0585611	0.00120753	0.702843	0.0143475	0.0866995	0.00099435	0.561832	550.035	44.4375	540.488	8.56309	535.988	5.90569
SA02 09	0.0588187	0.00100376	0.705755	0.0127944	0.0866672	0.0010018	0.637619	561.145	37.03	542.223	7.62502	535.796	5.95
SA02 10	0.0577162	0.00101683	0.695492	0.0133029	0.0868626	0.00107146	0.644898	520.41	43.515	536.095	7.97504	536.955	6.36167
SA02 11	0.0588342	0.00110401	0.702397	0.0129008	0.0862837	0.000982877	0.620207	561.145	45.36	540.222	7.70336	533.521	5.83987
SA02 12	0.0577607	0.00111494	0.689982	0.0132909	0.0863002	0.00102661	0.617558	520.41	42.5875	532.79	7.99373	533.619	6.09903
SA02 13	0.0588445	0.0011364	0.717515	0.0133731	0.0882253	0.00104383	0.634796	561.145	45.36	549.199	7.9149	545.033	6.19042
SA02 14	0.058244	0.00115507	0.696887	0.0137503	0.0864099	0.00108366	0.635595	538.925	44.4375	536.93	8.23601	534.27	6.43659
SA02 15	0.0579062	0.0010854	0.692199	0.0126733	0.0864243	0.000966706	0.610942	527.815	42.5875	534.121	7.61312	534.355	5.7433
SA02 16	0.0599543	0.00107844	0.715552	0.0137795	0.0860794	0.000984805	0.594101	611.13	38.88	548.038	8.16415	532.308	5.85236
SA02 17	0.0577571	0.00114608	0.690808	0.0122678	0.086554	0.00104029	0.676797	520.41	44.44	533.286	7.3761	535.125	6.17869
SA02 18	0.0576548	0.00120605	0.693786	0.0156983	0.086647	0.00104224	0.531603	516.705	41.6625	535.073	9.41775	535.677	6.18972
SA02 19	0.0579399	0.00110155	0.696575	0.0133718	0.0867449	0.000878678	0.527672	527.815	40.735	536.743	8.01121	536.257	5.22023
SA02 20	0.0582898	0.00100955	0.698699	0.013363	0.0864766	0.00104544	0.6321	538.925	43.5125	538.013	7.99601	534.666	6.20965
SA02 21	0.0587613	0.00106593	0.702643	0.0131445	0.086396	0.00102327	0.633121	566.7	40.7325	540.368	7.8474	534.187	6.07867
SA02 22	0.0596683	0.00119471	0.715964	0.0135795	0.0870028	0.00107537	0.651677	590.77	44.435	548.282	8.044	537.787	6.38403
SA02 23	0.0576604	0.00114033	0.692736	0.0152414	0.0863543	0.00104502	0.550026	516.705	44.44	534.443	9.14971	533.94	6.20782
SA02 24	0.0565303	0.00136212	0.677681	0.0137884	0.085697	0.00114388	0.656036	472.265	51.845	525.372	8.35277	530.038	6.79791
SA02 25	0.0576987	0.00114544	0.690587	0.0146688	0.0863712	0.00108324	0.590445	516.705	42.5875	533.153	8.81766	534.04	6.43428
SA02 26	0.0571903	0.00115782	0.690515	0.0147871	0.0871172	0.00110339	0.591448	498.19	44.44	533.11	8.88903	538.465	6.54937
SA02 27	0.0565952	0.00157123	0.696866	0.0175093	0.0876722	0.00117154	0.531831	475.97	93.5075	536.917	10.4837	541.756	6.94964
SA02 28	0.0575846	0.00137183	0.692327	0.0178519	0.0863892	0.00109821	0.493006	522.26	51.8475	534.197	10.7172	534.147	6.52294
SA02 29	0.0580518	0.00166037	0.693347	0.019973	0.0864298	0.00121409	0.487637	531.52	58.325	534.809	11.9819	534.388	7.2097
SA02 30	0.0567305	0.00167064	0.692447	0.0198136	0.086243	0.00140897	0.570955	479.67	66.66	534.27	11.8927	533.279	8.36665
SA02 31	0.055856	0.00131173	0.670631	0.0157736	0.0864993	0.00118496	0.58243	455.6	51.8475	521.096	9.59351	534.8	7.03654
SA02 32	0.0575191	0.00146691	0.691986	0.0169044	0.0866068	0.0011103	0.524789	522.26	55.55	533.993	10.151	535.438	6.5933
SA02 33	0.0557962	0.00142438	0.677718	0.0170503	0.087214	0.00105995	0.483075	442.64	57.4	525.395	10.3253	539.039	6.29148
SA02 34	0.0575169	0.00142068	0.693099	0.0167821	0.0864811	0.00117565	0.561442	522.26	53.7	534.661	10.0711	534.692	6.98145
SA02 35	0.0572682	0.00160178	0.690666	0.018159	0.0864729	0.00115396	0.507559	501.89	61.105	533.201	10.912	534.644	6.85293
SA02 36	0.0573127	0.00170555	0.691309	0.0198624	0.0862782	0.00127982	0.516285	501.89	66.66	533.587	11.93	533.488	7.60044
SA02 37	0.0556034	0.00141326	0.65858	0.0158494	0.0849058	0.00103554	0.506784	435.23	55.55	513.745	9.70932	525.339	6.15961
SA02 38	0.058154	0.00137978	0.700881	0.0160029	0.0864946	0.00108028	0.547007	600.025	51.845	539.317	9.56036	534.772	6.41603
SA02 39	0.0567617	0.00133528	0.684925	0.0155024	0.0867488	0.00120757	0.615028	483.375	86.1	529.747	9.34911	536.281	7.16898
SA02 40	0.0566775	0.00132689	0.674101	0.0152272	0.0855678	0.00112574	0.582414	479.67	51.8475	523.203	9.24251	529.271	6.69105
SA02 41	0.0579143	0.00144797	0.694435	0.0173465	0.0862319	0.00117456	0.54529	527.815	58.325	535.461	10.4012	533.213	6.97658
SA02 42	0.0597175	0.00150879	0.716166	0.0179236	0.0862811	0.00122394	0.566802	594.47	58.3225	548.401	10.6112	533.505	7.26903
								531.719	80.2076			534.095	7.78631
Zircon reference material
Analysis	Radiogenic Isotope Ratios						Rho	Isotopic Ages
	207Pb/206Pb	1s	207Pb/235U	1s	206Pb/238U	1s		207Pb/206Pb	1s	207Pb/235U	1s	206Pb/238U	1s
Plešovice zircon @NWU
PLE-01	0.053272	0.00155245	0.393214	0.0122034	0.0533663	0.00051191	0.309082	338.945	66.66	336.714	8.89688	335.156	3.13802
PLE-02	0.0533094	0.00131815	0.396168	0.0098638	0.0537473	0.000553283	0.413453	342.65	57.4025	338.865	7.17728	337.487	3.38967
PLE-03	0.053221	0.00160537	0.39829	0.012553	0.0540079	0.000572735	0.33647	338.945	36.1075	340.407	9.11845	339.081	3.50768
PLE-04	0.0535033	0.00159733	0.394983	0.0117541	0.0536435	0.000522135	0.327081	350.055	68.5125	338.003	8.55868	336.852	3.19971
PLE-05	0.0526299	0.00143523	0.394847	0.0107916	0.0544599	0.000594719	0.399559	322.28	61.105	337.904	7.8591	341.845	3.64049
PLE-06	0.0530474	0.00160947	0.394496	0.0122437	0.0538047	0.000535701	0.3208	331.54	68.5125	337.649	8.91801	337.838	3.28211
PLE-07	0.0514297	0.00149204	0.377934	0.0109128	0.053267	0.000582961	0.37902	261.175	66.655	325.517	8.04455	334.548	3.57253
GJ-1 zircon @CUG (Wuhan)
GJ-1-01	0.0605714	0.00142688	0.811571	0.0190156	0.0969266	0.000844099	0.371679	633.35	50.7625	603.335	10.6661	596.372	4.97104
GJ-1-02	0.0592871	0.00139859	0.798633	0.0189981	0.0973009	0.000759508	0.328136	575.96	51.8425	596.057	10.7326	598.572	4.47365
GJ-1-03	0.0583813	0.00127823	0.79173	0.017916	0.0978211	0.000727109	0.328475	542.63	48.1425	592.153	10.1611	601.627	4.28193
GJ-1-04	0.0584193	0.00134236	0.789294	0.0183992	0.0979134	0.000860231	0.376888	546.33	49.9925	590.771	10.4489	602.169	5.06131
GJ-1-05	0.0621537	0.0016279	0.849661	0.0224016	0.0986142	0.000742239	0.285477	679.64	55.55	624.463	12.3048	606.282	4.36758
GJ-1-06	0.0595022	0.00140898	0.820465	0.0202631	0.0993567	0.000826671	0.336892	587.065	51.84	608.308	11.3095	610.638	4.85864
GJ-1-07	0.0602921	0.0013682	0.809027	0.01884	0.0971575	0.00073598	0.325292	612.98	48.1375	601.908	10.5825	597.729	4.33632
GJ-1-08	0.059506	0.00143643	0.807347	0.0195284	0.0983059	0.000764806	0.321636	587.065	53.6925	600.965	10.9788	604.473	4.50081
GJ-1-09	0.0577966	0.0012556	0.787197	0.0174843	0.0982663	0.000728952	0.333987	520.41	48.1425	589.581	9.94166	604.241	4.2911
GJ-1-10	0.0607844	0.00124763	0.817784	0.0174006	0.0971654	0.000725938	0.351125	631.5	44.4375	606.811	9.72843	597.775	4.27746
GJ-1-11	0.0608456	0.00136568	0.815397	0.0185299	0.0970322	0.000696884	0.316039	635.2	48.91	605.477	10.3723	596.993	4.10772
GJ-1-12	0.0603356	0.00122794	0.811127	0.0169716	0.0972973	0.000696076	0.341917	616.685	42.5825	603.086	9.52375	598.55	4.10207
GJ-1-13	0.0618149	0.00140095	0.835859	0.0190435	0.0981267	0.000723362	0.32356	733.34	49.2225	616.858	10.541	603.421	4.25889
SA01 zircon @IGGCAS
SA01 01	0.0593142	0.00169164	0.707232	0.0204215	0.0863745	0.00114189	0.45784	588.915	61.1	543.101	12.1514	534.06	6.78198
SA01 02	0.0612425	0.00192405	0.726012	0.0217645	0.0864474	0.00107293	0.414016	655.57	66.6575	554.21	12.8092	534.492	6.37278
SA01 03	0.0583689	0.00165883	0.694514	0.0199314	0.0859233	0.00101997	0.413636	542.63	62.9525	535.509	11.9488	531.382	6.06166
SA01 04	0.0570383	0.00134845	0.684115	0.0165049	0.0864604	0.0008474	0.406244	494.485	51.8475	529.259	9.95762	534.569	5.03625
SA01 05	0.0583082	0.00158367	0.693498	0.0188018	0.086033	0.000954152	0.409071	542.63	59.25	534.9	11.279	532.033	5.67089
SA01 06	0.0584077	0.00165071	0.69587	0.0183964	0.087103	0.00108993	0.473325	546.33	61.1	536.321	11.0207	538.381	6.46969
SA01 07	0.0567593	0.0014627	0.675027	0.0164995	0.0863904	0.000992549	0.470043	483.375	52.7725	523.764	10.0081	534.154	5.89664
SA01 08	0.0597889	0.00164659	0.726147	0.0195219	0.0880516	0.00105062	0.443825	594.47	26.8475	554.289	11.4897	544.004	6.23158
SA01 09	0.0572923	0.0016366	0.682071	0.0194619	0.0862407	0.000995546	0.40457	501.89	62.9575	528.025	11.7537	533.266	5.91519

## Sheet: Table S6_O isotope
Table S6. O isotope Results
SIMS result
Sample (n =60)	δ18O	2SE
SA02
SA02@1	5.83124	0.331542
SA02@2	5.79773	0.239125
SA02@3	6.08753	0.331533
SA02@4	6.14511	0.18894
SA02@5	6.27303	0.144515
SA02@6	6.04028	0.182527
SA02@7	6.01492	0.284592
SA02@8	5.94965	0.269545
SA02@9	5.94524	0.170979
SA02@10	5.71883	0.168424
SA02@11	5.94666	0.193964
SA02@12	5.97502	0.213882
SA02@13	6.06903	0.189923
SA02@14	6.20509	0.179505
SA02@15	5.82886	0.227252
SA02@16	6.04165	0.266902
SA02@17	6.05765	0.290765
SA02@18	5.72093	0.175337
SA02@19	6.12342	0.316053
SA02@20	6.10344	0.308784
SA02@21	5.97254	0.24053
SA02@22	6.34209	0.319272
SA02@23	5.83805	0.255127
SA02@24	6.24881	0.266611
SA02@25	5.84348	0.23135
SA02@26	6.37168	0.239506
SA02@27	6.27897	0.296399
SA02@28	6.14861	0.232235
SA02@29	5.95737	0.249906
SA02@30	5.97629	0.335878
SA02@31	6.18037	0.174178
SA02@32	6.00918	0.361168
SA02@33	6.10097	0.260773
SA02@34	6.41719	0.251388
SA02@35	5.99911	0.349694
SA02@36	6.22799	0.190743
SA02@37	6.29045	0.297041
SA02@38	6.09296	0.310412
SA02@39	5.74138	0.252494
SA02@40	5.83955	0.17665
SA02@41	5.7165	0.225979
SA02@42	6.21735	0.197523
SA02@43	6.23997	0.230436
SA02@44	5.93388	0.292385
SA02@45	6.0383	0.254285
SA02@46	6.09969	0.195874
SA02@47	5.83314	0.284606
SA02@48	6.19748	0.233641
SA02@49	6.0952	0.257739
SA02@50	6.04977	0.297186
SA02@51	6.06654	0.228835
SA02@52	5.81054	0.198151
SA02@53	6.09346	0.244382
SA02@54	5.84094	0.198293
SA02@55	6.34844	0.243378
SA02@56	5.71794	0.261609
SA02@57	5.82902	0.264505
SA02@58	5.7638	0.199788
SA02@59	5.79045	0.212951
SA02@60	5.9047	0.19653
	6.02232	0.368389
Qinghu
Qinghu1@1	5.4	0.19
Qinghu1@2	5.23	0.3
Qinghu1@3	5.19	0.22
Qinghu1@4	5.29	0.24
Qinghu1@5	4.99	0.27
Qinghu1@6	5.14	0.35
Qinghu1@7	5.54	0.25
Qinghu1@8	5.19	0.43
Qinghu1@9	5.06	0.27
Qinghu1@10	5.52	0.32
Qinghu1@11	5.35	0.23
Qinghu1@12	5.65	0.35
Qinghu1@13	5.59	0.38
Qinghu1@14	5.34	0.31
	5.32	0.388991
Laser fluorination results
USTC (n=10)
SA02-1	6.17	0.1
SA02-2	6.17	0.1
SA02-3	6.08	0.1
SA02-4	5.79	0.1
SA02-5	6.17	0.1
SA02-6	6.13	0.1
SA02-7	6.15	0.1
SA02-8	6.13	0.1
SA02-9	5.91	0.1
SA02-10	5.78	0.1
IGGCAS (n=3)
SA02-1	5.9	0.1
SA02-2	6	0.1
SA02-3	6	0.1
	6.02923	0.276735

## Sheet: Table S7_Hf isotope
Table S7. Hf isotope results
LA-MC-ICP-MC Results
SA02 Zircon
	Sample	beta 2/3Yb	2σ	beta 7/9Hf	2σ	178Hf	180Hf	176Yb/176Lu	176Yb/177Hf(corr)	2σ	176Lu/177Hf(corr)	2σ	176Hf/177Hf(corr)	2σ	178Hf/177Hf(corr)	2σ	180Hf/177Hf(corr)	2σ
IGGCAS, Session 1	SA02 32U6H 01	-1.37684	0.111563	-1.52877	0.00418896	1.71509	2.24345	28.2692	0.0182975	3.03586e-05	0.000647258	3.62607e-07	0.282277	2.28343e-05	1.46729	6.33004e-05	1.88673	8.23462e-05
n = 84	SA02 32U6H 02	-1.39993	0.126724	-1.52924	0.00415651	1.79093	2.34288	28.1097	0.0182264	1.62314e-05	0.000648402	4.18972e-07	0.282288	2.30284e-05	1.46729	5.42907e-05	1.88689	8.07891e-05
	SA02 32U6H 03	-1.29414	0.110858	-1.52217	0.00457774	1.78792	2.33856	27.8414	0.0180511	2.47811e-05	0.000648355	3.74287e-07	0.2823	2.15967e-05	1.46728	6.17217e-05	1.88674	8.97965e-05
	SA02 32U6H 04	-1.25561	0.106077	-1.51764	0.00464288	1.86778	2.44319	28.0273	0.0181492	2.30697e-05	0.000647555	3.98786e-07	0.282288	1.98e-05	1.46729	6.17943e-05	1.88698	7.82116e-05
	SA02 32U6H 05	-1.40619	0.104058	-1.53355	0.00404285	1.97351	2.58177	27.7664	0.0179727	2.06219e-05	0.000647284	3.57569e-07	0.282268	2.06476e-05	1.46728	5.53844e-05	1.88684	7.23163e-05
	SA02 32U6H 06	-1.31585	0.108487	-1.52919	0.00416597	1.81376	2.37262	27.8871	0.0183279	3.0441e-05	0.000657218	4.48755e-07	0.282273	2.0059e-05	1.46727	6.27247e-05	1.88679	7.86288e-05
	SA02 32U6H 07	-1.31764	0.126617	-1.52696	0.00445057	1.70689	2.23283	27.9621	0.018654	1.94856e-05	0.000667117	3.75438e-07	0.282298	2.32729e-05	1.46727	6.28587e-05	1.88683	9.02908e-05
	SA02 32U6H 08	-1.38929	0.112754	-1.5332	0.00453618	1.72796	2.26059	28.1349	0.0189947	3.36427e-05	0.00067513	4.26071e-07	0.28226	2.25972e-05	1.46722	5.96782e-05	1.88682	7.29469e-05
	SA02 32U6H 09	-1.30495	0.101241	-1.53	0.00388929	1.65705	2.16763	28.417	0.0208833	2.15312e-05	0.000734888	3.92915e-07	0.282297	2.38373e-05	1.46726	5.53216e-05	1.88676	8.14061e-05
	SA02 32U6H 10	-1.29848	0.114319	-1.53133	0.004504	1.73381	2.26818	28.1579	0.0193245	1.95113e-05	0.000686291	4.74226e-07	0.282293	2.12786e-05	1.46725	6.06698e-05	1.88684	8.84848e-05
	SA02 32U6H 11	-1.27783	0.104485	-1.52729	0.00480632	1.75597	2.29712	28.1058	0.0197994	2.4951e-05	0.000704459	5.54893e-07	0.2823	2.34537e-05	1.46726	6.29651e-05	1.88689	8.78496e-05
	SA02 32U6H 12	-1.24599	0.116091	-1.52808	0.00427123	1.65874	2.16985	28.2871	0.0207046	1.66241e-05	0.000731945	4.05475e-07	0.282302	2.27676e-05	1.46725	6.08249e-05	1.8868	8.22423e-05
	SA02 32U6H 13	-1.41021	0.0991067	-1.53352	0.00478718	1.63364	2.13715	28.3554	0.0208234	1.52091e-05	0.00073437	3.97209e-07	0.28229	2.30253e-05	1.46722	6.72411e-05	1.88675	7.86908e-05
	SA02 32U6H 14	-1.34101	0.110168	-1.52809	0.00456458	1.67686	2.19384	28.2095	0.0204172	1.93998e-05	0.000723768	4.87116e-07	0.282276	2.1821e-05	1.46727	6.24635e-05	1.88707	7.87928e-05
	SA02 32U6H 15	-1.39106	0.103716	-1.5401	0.00428698	1.82407	2.38656	27.8428	0.018628	1.59979e-05	0.000669042	4.15258e-07	0.28228	2.16096e-05	1.46728	5.44043e-05	1.88693	7.41786e-05
	SA02 32U6H 16	-1.37445	0.113276	-1.53915	0.0045863	1.58387	2.07208	28.5187	0.0210146	1.99417e-05	0.000736871	3.91706e-07	0.282271	2.39263e-05	1.46728	5.94725e-05	1.88676	7.40327e-05
	SA02 32U6H 17	-1.35669	0.11741	-1.53742	0.00485924	1.65846	2.16961	28.2578	0.0206814	1.91938e-05	0.000731885	5.23804e-07	0.282259	2.62353e-05	1.46735	6.61197e-05	1.88682	8.11424e-05
	SA02 32U6H 18	-1.31232	0.111986	-1.53109	0.00491649	1.51433	1.98109	28.1671	0.0205881	1.23774e-05	0.000730927	4.09652e-07	0.282288	2.69216e-05	1.46728	6.8296e-05	1.88692	8.4751e-05
	SA02 32U6H 19	-1.35862	0.0935	-1.5322	0.00445797	1.65595	2.16634	28.7987	0.022038	3.99105e-05	0.000765243	4.16893e-07	0.282271	2.21572e-05	1.46733	6.68655e-05	1.88695	7.67984e-05
	SA02 32U6H 20	-1.37406	0.112087	-1.54826	0.00478845	1.56458	2.04725	28.4168	0.0212536	2.96431e-05	0.000747923	6.79748e-07	0.28228	2.4109e-05	1.46729	7.02062e-05	1.88696	8.16303e-05
	SA02 32U6H 21	-1.22924	0.112641	-1.53618	0.0048949	1.62675	2.12832	28.5755	0.0218469	2.06115e-05	0.00076453	3.87456e-07	0.2823	2.3635e-05	1.4672	7.03264e-05	1.88686	7.92423e-05
	SA02 32U6H 22	-1.36889	0.119644	-1.55773	0.00485824	1.61312	2.11081	28.1112	0.019383	1.5551e-05	0.000689513	3.77014e-07	0.282283	2.44346e-05	1.46727	6.76745e-05	1.88676	8.28216e-05
	SA02 32U6H 23	-1.34116	0.110365	-1.55844	0.00496694	1.64616	2.15399	28.3298	0.0195178	2.46799e-05	0.000688951	4.24294e-07	0.282297	2.64488e-05	1.46728	6.50302e-05	1.88672	7.73188e-05
	SA02 32U6H 24	-1.26032	0.105763	-1.51124	0.00501275	1.63037	2.13235	28.3806	0.022803	1.42109e-05	0.000803471	4.54448e-07	0.282322	2.30716e-05	1.46723	6.58018e-05	1.88677	9.1052e-05
	SA02 32U6H 25	-1.29962	0.0991301	-1.51185	0.00418209	1.6591	2.16993	28.8161	0.0229039	1.79705e-05	0.000794831	3.98828e-07	0.282279	2.07777e-05	1.46727	6.28866e-05	1.88682	7.23173e-05
	SA02 32U6H 26	-1.31896	0.0885084	-1.51379	0.00436924	1.84296	2.41059	28.7031	0.0226778	2.30078e-05	0.000790082	4.09469e-07	0.282275	1.84779e-05	1.46722	6.55192e-05	1.88687	8.44085e-05
	SA02 32U6H 27	-1.31925	0.099812	-1.52357	0.00452035	1.80894	2.36607	28.6036	0.0224333	1.72753e-05	0.000784283	3.63065e-07	0.282309	2.03762e-05	1.46727	5.5679e-05	1.88671	7.65935e-05
	SA02 32U6H 28	-1.26699	0.113551	-1.52378	0.00409621	1.85791	2.43018	29.1839	0.0183025	0.000189224	0.000627145	3.46059e-07	0.282287	2.17362e-05	1.46729	5.85264e-05	1.8868	7.33326e-05
	SA02 32U6H 29	-1.41077	0.122228	-1.53684	0.00457675	1.79509	2.34836	28.1959	0.0179818	3.91384e-05	0.000637745	3.73007e-07	0.282266	2.48045e-05	1.46728	6.46936e-05	1.88677	8.06132e-05
	SA02 32U6H 30	-1.25913	0.11088	-1.53813	0.00466668	1.73622	2.27147	28.2203	0.0189415	3.16937e-05	0.000671199	3.8166e-07	0.282315	2.10965e-05	1.46729	6.23192e-05	1.88686	7.06529e-05
	SA02 32U6H 31	-1.31857	0.123341	-1.54008	0.00423772	1.82734	2.3906	28.2439	0.0166331	5.64461e-05	0.00058891	4.02851e-07	0.282267	2.14319e-05	1.46732	5.67138e-05	1.8868	6.96886e-05
	SA02 32U6H 32	-1.42226	0.124218	-1.54428	0.00395138	1.81668	2.37673	27.7608	0.0159641	3.41694e-05	0.000575058	3.57187e-07	0.282261	2.23272e-05	1.46735	5.52356e-05	1.8868	7.58708e-05
	SA02 32U6H 33	-1.42494	0.135436	-1.54448	0.00435671	1.81954	2.38043	27.6896	0.0158644	2.74048e-05	0.000572937	3.50155e-07	0.282264	2.25706e-05	1.46731	5.8157e-05	1.88672	7.25425e-05
	SA02 32U6H 34	-1.35472	0.134352	-1.54949	0.00431708	1.82216	2.3842	27.5596	0.015697	2.28336e-05	0.000569566	3.80683e-07	0.282291	2.16806e-05	1.46725	6.49306e-05	1.88681	7.35794e-05
	SA02 32U6H 35	-1.35645	0.0995442	-1.54908	0.00410139	2.02034	2.64335	28.1644	0.0187969	4.97383e-05	0.000667398	3.31126e-07	0.28227	2.01446e-05	1.4673	5.52135e-05	1.88677	6.57146e-05
	SA02 32U6H 36	-1.32134	0.116271	-1.55077	0.00440684	1.90957	2.49858	27.8588	0.0184321	3.14416e-05	0.000661627	4.0251e-07	0.28227	2.07298e-05	1.46732	5.57087e-05	1.88688	6.68615e-05
	SA02 32U6H 37	-1.30757	0.0986755	-1.54957	0.00427628	1.9257	2.51948	27.8772	0.0187171	2.69222e-05	0.000671413	3.44918e-07	0.282307	2.06092e-05	1.46729	5.95772e-05	1.8867	7.26419e-05
	SA02 32U6H 38	-1.2668	0.106585	-1.55397	0.00406302	2.01417	2.63565	27.7021	0.0183302	2.37647e-05	0.000661689	3.82378e-07	0.282315	1.95734e-05	1.46726	5.66236e-05	1.88688	6.19936e-05
	SA02 32U6H 39	-1.28279	0.112624	-1.54193	0.00461354	1.72444	2.25597	27.7	0.0181159	1.628e-05	0.000654004	4.60042e-07	0.282286	2.19821e-05	1.46733	6.99975e-05	1.88675	7.58473e-05
	SA02 32U6H 40	-1.30675	0.110076	-1.54839	0.00433526	1.83907	2.40615	27.9625	0.0186733	3.08515e-05	0.000667797	4.32211e-07	0.282311	2.2668e-05	1.46731	6.09988e-05	1.88677	8.20896e-05
	SA02 32U6H 41	-1.32224	0.105874	-1.54685	0.00446213	1.72364	2.25521	27.9833	0.0190429	1.8023e-05	0.00068051	4.34374e-07	0.282301	2.09758e-05	1.46729	6.22186e-05	1.88684	7.553e-05
	SA02 32U6H 42	-1.34604	0.112707	-1.55694	0.00424939	1.70322	2.22861	28.0695	0.0191995	1.70197e-05	0.000683999	4.42129e-07	0.282295	2.39824e-05	1.46724	5.75347e-05	1.88665	7.47611e-05
	SA02 32U6H 43	-1.35478	0.120003	-1.54613	0.00531471	1.65329	2.16319	28.1572	0.0193385	2.25702e-05	0.000686805	4.75963e-07	0.282265	2.18505e-05	1.46731	5.99841e-05	1.8869	7.69833e-05
	SA02 32U6H 44	-1.30942	0.123144	-1.54896	0.00476156	1.60945	2.10569	28.0569	0.0199633	1.35964e-05	0.00071153	4.44422e-07	0.282314	2.34252e-05	1.46732	6.27805e-05	1.88674	8.16716e-05
	SA02 32U6H 45	-1.3764	0.0949056	-1.55295	0.00439852	1.94005	2.53861	28.1395	0.0200096	3.36707e-05	0.000711088	5.1297e-07	0.282265	2.06783e-05	1.46726	5.52856e-05	1.88687	7.66413e-05
	SA02 32U6H 46	-1.26246	0.0973571	-1.55524	0.00476191	1.80771	2.36532	27.7218	0.0186407	2.27637e-05	0.000672422	4.48292e-07	0.282292	2.00585e-05	1.46729	5.79309e-05	1.88675	7.81587e-05
	SA02 32U6H 47	-1.37831	0.103819	-1.5597	0.00428256	1.89414	2.47841	27.8773	0.0186535	2.53618e-05	0.000669127	4.13414e-07	0.282299	1.92023e-05	1.46724	5.86283e-05	1.8866	7.52171e-05
	SA02 32U6H 48	-1.34701	0.112688	-1.54357	0.00408033	1.85355	2.42539	27.8746	0.0183359	2.11114e-05	0.000657799	4.15304e-07	0.282271	2.3878e-05	1.46728	5.91118e-05	1.88704	6.32572e-05
	SA02 32U6H 49	-1.3412	0.0878343	-1.55073	0.00449023	1.93601	2.5331	29.4419	0.0228948	8.69145e-05	0.000777626	3.50992e-07	0.2823	2.20963e-05	1.46732	6.15869e-05	1.8868	7.69804e-05
	SA02 32U6H 50	-1.33787	0.0876123	-1.55203	0.00414823	1.90309	2.49007	28.6699	0.0220216	3.12745e-05	0.000768109	3.61332e-07	0.282302	1.84433e-05	1.46736	6.00917e-05	1.88686	7.78332e-05
	SA02 32U6H 51	-1.32624	0.0898098	-1.54333	0.0043089	1.95406	2.55667	28.5525	0.0211767	3.39805e-05	0.000741673	3.86529e-07	0.282279	2.11784e-05	1.46728	6.99768e-05	1.88689	7.44062e-05
	SA02 32U6H 52	-1.35724	0.121347	-1.54394	0.0045466	1.69307	2.21519	28.0906	0.0191309	2.62854e-05	0.000681042	3.65362e-07	0.282283	2.17494e-05	1.46728	6.42596e-05	1.88687	8.43019e-05
	SA02 32U6H 53	-1.33802	0.112552	-1.5413	0.00449009	1.73646	2.27177	28.1432	0.0189615	1.40858e-05	0.000673751	3.91377e-07	0.282303	2.2554e-05	1.46728	5.82699e-05	1.88677	6.77474e-05
	SA02 32U6H 54	-1.36544	0.0979245	-1.55309	0.00423332	2.00229	2.61986	28.2646	0.0192633	3.49537e-05	0.000681536	3.67627e-07	0.2823	2.12158e-05	1.46732	5.76713e-05	1.88678	7.3299e-05
	SA02 32U6H 55	-1.38384	0.0993226	-1.54887	0.00446026	1.90351	2.49041	28.077	0.0191114	2.88493e-05	0.000680678	3.79056e-07	0.282274	2.04195e-05	1.46734	5.63414e-05	1.88676	6.32915e-05
	SA02 32U6H 56	-1.30016	0.101229	-1.54489	0.00417302	1.97385	2.58257	27.8587	0.0183221	2.60545e-05	0.000657679	4.03046e-07	0.282297	1.99994e-05	1.46728	5.4228e-05	1.88686	7.45383e-05
	SA02 32U6H 57	-1.33468	0.0982714	-1.54589	0.00430496	1.79738	2.35149	28.7618	0.0224255	2.14081e-05	0.000779697	3.46141e-07	0.28231	2.12501e-05	1.46732	5.5949e-05	1.88674	6.86052e-05
	SA02 32U6H 58	-1.28551	0.0946583	-1.5311	0.00443158	1.82672	2.3898	28.637	0.0226899	3.47464e-05	0.000792328	3.42711e-07	0.282312	2.14316e-05	1.4673	6.08165e-05	1.88695	8.58294e-05
	SA02 32U6H 59	-1.34892	0.0840643	-1.53133	0.00409326	1.8908	2.47348	28.4351	0.0224886	1.19204e-05	0.000790875	3.80411e-07	0.282311	1.96681e-05	1.46726	6.06273e-05	1.88678	7.74306e-05
	SA02 32U6H 60	-1.29672	0.0846218	-1.52827	0.00407668	1.86626	2.44126	28.3912	0.022526	1.31488e-05	0.000793413	3.95629e-07	0.2823	2.04247e-05	1.46726	6.22156e-05	1.88675	8.51155e-05
	SA02 32U6H 61	-1.33557	0.0923929	-1.53145	0.00425531	1.84831	2.41791	28.3777	0.0224609	1.6007e-05	0.000791498	4.05827e-07	0.282259	2.21991e-05	1.4673	6.07803e-05	1.88684	8.04434e-05
	SA02 32U6H 62	-1.33664	0.0884805	-1.53077	0.00420926	1.89058	2.47317	28.3273	0.0222446	1.55296e-05	0.000785271	3.92572e-07	0.28228	2.15481e-05	1.46733	5.37161e-05	1.88687	7.81231e-05
	SA02 32U6H 63	-1.26844	0.0872518	-1.52984	0.00458707	1.94743	2.5476	28.3671	0.0223153	1.56875e-05	0.000786663	4.00344e-07	0.282294	2.10358e-05	1.46727	5.60042e-05	1.88685	7.10835e-05
	SA02 32U6H 64	-1.35886	0.0801993	-1.54068	0.0039585	1.97985	2.59027	28.4789	0.0223191	2.42327e-05	0.000783705	3.70481e-07	0.282285	2.08508e-05	1.46727	5.26116e-05	1.88683	6.05159e-05
	SA02 32U6H 65	-1.333	0.0898187	-1.53398	0.00410955	1.94538	2.54482	28.3682	0.0224319	1.71269e-05	0.000790739	4.03062e-07	0.282296	2.0165e-05	1.46734	5.83396e-05	1.88679	7.92634e-05
	SA02 32U6H 66	-1.34035	0.0862969	-1.53727	0.00466685	1.98034	2.59072	28.4081	0.022469	1.63914e-05	0.000790937	3.56257e-07	0.282283	2.08496e-05	1.46727	6.09537e-05	1.88675	8.44117e-05
	SA02 32U6H 67	-1.34079	0.0872103	-1.53669	0.00388112	1.94508	2.54457	28.4733	0.0226124	1.97863e-05	0.000794163	4.64346e-07	0.282285	2.0352e-05	1.46724	5.25255e-05	1.88671	7.48372e-05
	SA02 32U6H 68	-1.28924	0.0852946	-1.53606	0.00433497	1.95667	2.55989	28.3259	0.0225761	1.70232e-05	0.000797012	4.2231e-07	0.282311	2.12334e-05	1.46726	5.41591e-05	1.88687	7.46585e-05
	SA02 32U6H 69	-1.31517	0.0932468	-1.53446	0.00401807	1.99233	2.60652	28.4023	0.0226654	1.62233e-05	0.000798011	4.05844e-07	0.282279	1.99953e-05	1.46731	5.25998e-05	1.88695	7.40253e-05
	SA02 32U6H 70	-1.25984	0.111341	-1.51388	0.00497114	1.60172	2.09506	28.3935	0.0226478	1.3719e-05	0.000797637	4.56324e-07	0.282316	2.51506e-05	1.46735	6.67155e-05	1.88703	9.59949e-05
	SA02 32U6H 71	-1.31172	0.109442	-1.53493	0.00462726	1.61269	2.10961	28.5059	0.0224247	1.60578e-05	0.000786667	3.68488e-07	0.282289	2.27905e-05	1.46729	6.04688e-05	1.88669	7.40078e-05
	SA02 32U6H 72	-1.39047	0.104439	-1.53496	0.00425484	1.74905	2.28788	28.3948	0.0225776	1.22995e-05	0.000795134	3.87252e-07	0.28229	2.10478e-05	1.46732	5.553e-05	1.88666	7.46126e-05
	SA02 32U6H 73	-1.31858	0.0905211	-1.53194	0.00449862	1.82604	2.38863	28.3615	0.0227441	1.74536e-05	0.000801937	3.98679e-07	0.282305	2.39439e-05	1.46736	5.94469e-05	1.88678	8.02254e-05
	SA02 32U6H 74	-1.31657	0.0977134	-1.53076	0.00518846	1.79905	2.35353	28.3305	0.0226822	1.38521e-05	0.000800628	3.78761e-07	0.282311	2.26548e-05	1.46725	5.83321e-05	1.88684	7.1838e-05
	SA02 32U6H 75	-1.2785	0.105475	-1.52587	0.00430835	1.82015	2.38099	27.9859	0.0207164	4.79052e-05	0.000740245	1.41602e-06	0.282295	2.02193e-05	1.46722	5.6478e-05	1.8868	7.61343e-05
	SA02 32U6H 76	-1.32617	0.102572	-1.53286	0.00454872	1.70289	2.2275	28.4767	0.0222832	1.54369e-05	0.000782505	4.08724e-07	0.282285	2.41548e-05	1.46726	5.91816e-05	1.88661	8.33008e-05
	SA02 32U6H 77	-1.24968	0.102599	-1.52286	0.00448152	1.80321	2.35896	28.5954	0.0223298	1.72107e-05	0.000780888	3.66075e-07	0.282295	2.47195e-05	1.4673	5.6892e-05	1.88707	7.04803e-05
	SA02 32U6H 78	-1.40553	0.091787	-1.52815	0.00437948	1.83843	2.40481	28.4748	0.0219108	1.24976e-05	0.000769482	3.65147e-07	0.282255	1.8974e-05	1.46742	5.61084e-05	1.88693	7.23776e-05
	SA02 32U6H 79	-1.2928	0.0906839	-1.52658	0.00453653	1.85827	2.43085	28.3457	0.021198	2.51989e-05	0.000747837	6.86448e-07	0.28229	2.16644e-05	1.4673	5.99096e-05	1.88688	7.4393e-05
	SA02 32U6H 80	-1.24079	0.0928197	-1.52538	0.00430838	1.84732	2.41642	28.2495	0.0215867	9.88423e-06	0.000764144	3.60856e-07	0.282317	2.10592e-05	1.46729	5.45202e-05	1.88681	8.42377e-05
	SA02 32U6H 81	-1.26207	0.0883406	-1.52498	0.00412629	1.79181	2.34375	28.5412	0.0225679	1.93967e-05	0.000790715	3.65606e-07	0.282317	2.00936e-05	1.46732	6.41296e-05	1.88681	8.18267e-05
	SA02 32U6H 82	-1.33971	0.0858248	-1.51075	0.0045931	1.78859	2.33945	28.5116	0.0225752	1.52479e-05	0.000791791	3.99286e-07	0.282277	2.45725e-05	1.46731	5.90365e-05	1.88703	8.42639e-05
	SA02 32U6H 83	-1.27858	0.0888318	-1.52065	0.00461376	1.86934	2.44516	28.4197	0.0223912	1.61555e-05	0.000787876	4.00379e-07	0.28232	2.31224e-05	1.46729	5.50218e-05	1.88685	7.80262e-05
	SA02 32U6H 84	-1.30023	0.0860763	-1.52129	0.00436451	1.92713	2.5207	28.387	0.02194	1.5618e-05	0.000772888	3.58564e-07	0.282291	2.15295e-05	1.46726	5.53111e-05	1.88677	7.13805e-05
IGGCAS, Session 2	SA02 44U6H 01	-1.38119	0.0906317	-1.61415	0.00484796	2.45089	3.20919	26.706	0.0164307	2.55293e-05	0.000615244	3.64696e-07	0.282282	1.88233e-05	1.46725	4.93053e-05	1.88681	0.000103352
n = 16	SA02 44U6H 02	-1.45015	0.0938866	-1.61544	0.00492814	2.38609	3.12433	26.5937	0.0156871	2.19457e-05	0.000589881	3.38756e-07	0.282267	2.0846e-05	1.46726	6.04792e-05	1.88677	0.000116476
	SA02 44U6H 03	-1.32447	0.141219	-1.61591	0.00490051	2.27458	2.97817	26.2427	0.0126605	2.08198e-05	0.000482439	6.41107e-07	0.282291	2.00375e-05	1.46731	5.67521e-05	1.88674	0.000109489
	SA02 44U6H 04	-1.37214	0.104556	-1.61107	0.00487037	2.26555	2.96622	26.6437	0.0157751	2.10384e-05	0.000592077	3.3947e-07	0.282297	1.78329e-05	1.46728	5.53468e-05	1.88672	0.000105856
	SA02 44U6H 05	-1.4325	0.0982349	-1.61212	0.00453553	2.28075	2.98623	26.7193	0.0165654	1.86839e-05	0.000619978	3.15085e-07	0.282283	2.12047e-05	1.46728	5.72491e-05	1.88676	0.00011573
	SA02 44U6H 06	-1.4855	0.103356	-1.61073	0.00520311	2.40099	3.1437	26.4557	0.014122	4.61365e-05	0.000533797	5.2758e-07	0.282251	1.94125e-05	1.46731	5.58101e-05	1.88685	0.000107775
	SA02 44U6H 07	-1.45154	0.136985	-1.61179	0.00497652	2.21577	2.90108	25.8882	0.0126282	0.000216538	0.000487797	6.48969e-06	0.28229	1.86221e-05	1.4673	6.31585e-05	1.88675	0.000116175
	SA02 44U6H 08	-1.41729	0.115579	-1.61824	0.00501807	2.16385	2.83318	26.5889	0.0158665	8.75146e-06	0.000596735	5.02829e-07	0.282316	2.15747e-05	1.46725	5.575e-05	1.88661	0.000114076
	SA02 44U6H 09	-1.43635	0.11101	-1.6176	0.00506519	2.17002	2.84145	26.5442	0.0157855	1.23833e-05	0.000594685	3.21841e-07	0.28227	1.89065e-05	1.4672	5.91411e-05	1.88669	0.000113582
	SA02 44U6H 10	-1.43972	0.101881	-1.60538	0.00525094	2.15477	2.82118	26.8306	0.0164649	1.75971e-05	0.000613661	3.40417e-07	0.282284	2.12053e-05	1.4673	6.23986e-05	1.88687	0.000110685
	SA02 44U6H 11	-1.40443	0.100988	-1.60753	0.00550044	2.16569	2.83538	26.8892	0.0165283	2.55176e-05	0.000614682	3.24515e-07	0.282285	2.33039e-05	1.46726	6.18554e-05	1.88672	0.00010894
	SA02 44U6H 12	-1.41352	0.0991236	-1.60196	0.00555426	2.22468	2.91236	27.3005	0.0170489	2.99462e-05	0.000624489	3.65889e-07	0.282288	2.17492e-05	1.46725	6.15493e-05	1.88666	0.00011795
	SA02 44U6H 13	-1.35828	0.0867353	-1.5949	0.00503928	2.24126	2.93395	26.9531	0.016783	3.35295e-05	0.000622676	3.01446e-07	0.282303	2.13556e-05	1.46729	5.73251e-05	1.88678	0.000104083
	SA02 44U6H 14	-1.38746	0.0989804	-1.59774	0.00473267	2.25697	2.95471	26.9611	0.0169016	2.45971e-05	0.00062689	3.6884e-07	0.282287	2.14863e-05	1.46725	5.81472e-05	1.88679	9.70283e-05
	SA02 44U6H 15	-1.39101	0.0930109	-1.59827	0.00471368	2.17836	2.85178	27.0675	0.0172367	2.24248e-05	0.000636806	3.31181e-07	0.282319	2.14274e-05	1.46724	5.49235e-05	1.88676	0.000101456
	SA02 44U6H 16	-1.38747	0.0951393	-1.59864	0.00455565	2.11782	2.77254	26.8446	0.0169672	2.3999e-05	0.000632053	3.10294e-07	0.282297	2.12421e-05	1.46722	5.33827e-05	1.88673	9.41827e-05
NWU	SA02-01								0.0201888	5.08e-05	0.000472822	5.08e-07	0.282294	2.62e-05
n = 42	SA02-02								0.0053072	1.738e-05	0.000133672	3.38e-07	0.282279	2.38e-05
	SA02-03								0.0224973	1.822e-05	0.00054576	1.484e-06	0.282285	2.56e-05
	SA02-04								0.0249262	5.48e-05	0.000564357	4.62e-07	0.282283	2.62e-05
	SA02-05								0.0395216	9.54e-05	0.000889776	5.14e-07	0.282288	2.7e-05
	SA02-06								0.0102582	2.54e-05	0.00025293	3.44e-07	0.282285	2.42e-05
	SA02-07								0.0382865	8.38e-05	0.000868125	5.64e-07	0.28228	2.78e-05
	SA02-08								0.00887909	2.2e-05	0.000221121	3.96e-07	0.282327	2.24e-05
	SA02-09								0.0145469	4e-05	0.000343853	4.66e-07	0.282303	3.16e-05
	SA02-10								0.00605679	2.12e-05	0.00015103	3.96e-07	0.28227	2.62e-05
	SA02-11								0.033384	7.7e-05	0.00076367	5.9e-07	0.282307	3.02e-05
	SA02-12								0.0217538	7.42e-05	0.000494932	5.38e-07	0.282276	3.24e-05
	SA02-13								0.0141182	6.66e-05	0.000373281	7.34e-07	0.282269	2.26e-05
	SA02-14								0.0164642	3.12e-05	0.000405456	4.54e-07	0.282292	2.68e-05
	SA02-15								0.0377092	8.74e-05	0.000860389	5.22e-07	0.282275	2.48e-05
	SA02-16								0.021072	6.5e-05	0.000510818	2.58e-06	0.282292	2.72e-05
	SA02-17								0.0122941	2.78e-05	0.000297732	4.04e-07	0.282279	2.74e-05
	SA02-18								0.0199836	4.28e-05	0.000469214	5.16e-07	0.282279	2.6e-05
	SA02-19								0.0229544	4.92e-05	0.000530893	4.98e-07	0.282295	2.36e-05
	SA02-20								0.0155147	4.02e-05	0.000380335	3.72e-07	0.282271	2.46e-05
	SA02-21								0.0226031	5e-05	0.000518296	4.78e-07	0.282278	2.8e-05
	SA02-22								0.0197547	4.56e-05	0.000446853	4.4e-07	0.282287	2.42e-05
	SA02-23								0.0177735	4.26e-05	0.00041305	4.62e-07	0.282281	2.72e-05
	SA02-24								0.0122941	2.78e-05	0.000297732	4.04e-07	0.282279	2.74e-05
	SA02-25								0.023624	0.0001032	0.000571714	8.98e-07	0.282293	2.5e-05
	SA02-26								0.0372823	8.4e-05	0.000858003	6.02e-07	0.282299	2.74e-05
	SA02-27								0.0335706	8.32e-05	0.000769191	4.94e-07	0.282307	2.62e-05
	SA02-28								0.0194192	5.38e-05	0.000472926	4.5e-07	0.282263	2.74e-05
	SA02-29								0.0257562	6.68e-05	0.000586077	3.98e-07	0.282305	2.24e-05
	SA02-30								0.00656381	2.04e-05	0.000161775	3.9e-07	0.282293	2.5e-05
	SA02-31								0.00644159	8.44e-05	0.000160914	1.612e-06	0.282318	2.72e-05
	SA02-32								0.0332252	4.8e-05	0.000767432	1.694e-06	0.282271	2.88e-05
	SA02-33								0.0390987	8.94e-05	0.000886722	6.34e-07	0.282309	2.72e-05
	SA02-34								0.0280895	6.02e-05	0.000627372	4.86e-07	0.282274	3.02e-05
	SA02-35								0.0345859	8.54e-05	0.000801286	5.2e-07	0.282261	2.54e-05
	SA02-36								0.00556926	1.424e-05	0.000141723	4.18e-07	0.282307	2.32e-05
	SA02-37								0.0176537	4.42e-05	0.000404414	4.4e-07	0.282328	2.78e-05
	SA02-38								0.0398951	8.74e-05	0.000908219	5.42e-07	0.282309	2.76e-05
	SA02-39								0.0139054	3.56e-05	0.000328088	4.34e-07	0.28228	2.9e-05
	SA02-40								0.0191047	3.4e-05	0.000466696	6.58e-07	0.282297	2.74e-05
	SA02-41								0.0190084	2.86e-05	0.00046445	7.02e-07	0.282286	2.82e-05
	SA02-42								0.0396587	0.0001042	0.000889808	5.7e-07	0.28231	2.76e-05
Zircon Reference material
NWU （n=16)	91500 01								0.00932709	9.65e-06	0.000258704	3.4e-07	0.282286	1.65e-05
	91500 02								0.0092561	1.49e-05	0.00025795	2.92e-07	0.28228	1.83e-05
	91500 03								0.00923211	1.38e-05	0.000257058	2.59e-07	0.282283	1.6e-05
	91500 04								0.0106231	7.49e-06	0.000296812	4.51e-07	0.282272	1.81e-05
	91500 05								0.00930638	7.59e-06	0.000258079	3.17e-07	0.28228	1.61e-05
	91500 06								0.00929421	1.32e-05	0.000258741	3.19e-07	0.282297	1.75e-05
	91500 07								0.00886995	9.86e-06	0.000246151	3.24e-07	0.282291	1.64e-05
	91500 08								0.00899252	9.39e-06	0.000250541	2.99e-07	0.282285	1.65e-05
	91500 09								0.00880852	1.18e-05	0.000246127	3.02e-07	0.282305	1.48e-05
	91500 10								0.00880239	1.09e-05	0.000245208	3.37e-07	0.282283	1.49e-05
	91500 11								0.0101335	8.38e-06	0.000281754	5.91e-07	0.28232	1.92e-05
	91500 12								0.0091588	8.54e-06	0.000255307	3.58e-07	0.282308	1.63e-05
	91500 13								0.00922201	1.22e-05	0.000256001	3.19e-07	0.28227	1.85e-05
	91500 14								0.0095826	7.21e-06	0.000268982	4.58e-07	0.282323	1.55e-05
	91500 15								0.0111059	6.74e-06	0.000307245	4.47e-07	0.282288	1.61e-05
	91500 16								0.0114262	9.74e-06	0.000315438	3.77e-07	0.282322	1.78e-05
NWU (n=8)	Mud Tank 01								0.00450201	6.32e-06	9.63111e-05	2.26e-07	0.282498	1.45e-05
	Mud Tank 02								0.00492289	1.26e-05	0.000106796	2.37e-07	0.282531	1.15e-05
	Mud Tank 03								0.00475232	6.2e-06	9.8655e-05	1.39e-07	0.282495	9.66e-06
	Mud Tank 04								0.00466546	6.62e-06	9.65627e-05	1.4e-07	0.28252	1.05e-05
	Mud Tank 05								0.00465876	4.74e-06	9.71912e-05	2.19e-07	0.282486	1.09e-05
	Mud Tank 06								0.00405006	1.39e-05	8.71661e-05	3.33e-07	0.282528	1.07e-05
	Mud Tank 07								0.00392193	1.43e-05	8.43967e-05	3.18e-07	0.282514	1.13e-05
	Mud Tank 08								0.00434479	6.69e-06	9.51615e-05	1.52e-07	0.282505	1.05e-05
IGGCAS (n=31)	Mud Tank 01	-1.3438	1.95144	-1.49727	0.00436689	2.09785	2.74334	29.5006	0.000752592	1.0449e-05	2.55111e-05	4.15132e-07	0.28249	1.84801e-05
	Mud Tank 02	0.0839602	2.06281	-1.50778	0.00372396	2.10198	2.74894	28.9479	0.000836032	5.58063e-06	2.88805e-05	2.74073e-07	0.282522	2.07416e-05
	Mud Tank 03	-0.273627	1.88893	-1.5092	0.00385329	2.09649	2.74186	28.7411	0.000866573	5.27941e-06	3.0151e-05	2.59773e-07	0.282513	1.90698e-05
	Mud Tank 04	0.963858	1.9924	-1.5101	0.004135	1.92468	2.51723	28.612	0.000844581	8.61652e-06	2.95185e-05	3.68592e-07	0.282517	1.96556e-05
	Mud Tank 05	-1.30418	1.00754	-1.52268	0.00407031	2.13672	2.79502	29.4113	0.00150507	5.7583e-06	5.11734e-05	2.66419e-07	0.282466	1.94313e-05
	Mud Tank 06	-1.20904	1.26528	-1.51666	0.00390622	2.10057	2.74762	29.5337	0.00126768	5.64012e-06	4.29233e-05	2.72512e-07	0.282488	2.14772e-05
	Mud Tank 07	-1.34434	1.28425	-1.51771	0.00449399	1.9867	2.59854	29.4694	0.00129573	6.03047e-06	4.39688e-05	3.1021e-07	0.28248	2.16398e-05
	Mud Tank 08	0.453443	1.40212	-1.51963	0.00412559	1.88498	2.46558	28.7721	0.00130527	7.28826e-06	4.5366e-05	3.59367e-07	0.282532	1.89167e-05
	Mud Tank 09	-0.329917	1.6771	-1.51935	0.00435654	1.83857	2.40471	29.1981	0.00107119	7.44671e-06	3.66869e-05	3.7008e-07	0.282523	2.21286e-05
	Mud Tank 10	0.565209	2.6727	-1.52524	0.00431782	1.95654	2.55931	28.3311	0.000640782	6.998e-06	2.26176e-05	3.1125e-07	0.282495	2.00787e-05
	Mud Tank 11	0.346173	2.81651	-1.54788	0.00490033	1.69932	2.22349	28.917	0.000777056	6.34062e-06	2.68719e-05	3.90141e-07	0.282526	2.26649e-05
	Mud Tank 12	-0.871238	2.48438	-1.54139	0.0042684	1.76186	2.30512	29.4455	0.000748181	6.45443e-06	2.5409e-05	3.4047e-07	0.282487	2.21133e-05
	Mud Tank 13	-0.735816	1.6629	-1.54705	0.0041008	1.7646	2.30873	29.0861	0.00106428	7.68026e-06	3.65906e-05	3.39086e-07	0.282511	2.17717e-05
	Mud Tank 14	1.08592	2.36632	-1.53946	0.00440422	1.80657	2.36353	28.7496	0.000843745	7.51147e-06	2.93481e-05	3.22272e-07	0.282531	2.32469e-05
	Mud Tank 15	1.35001	1.83241	-1.54316	0.00441536	1.87924	2.45868	28.5558	0.000859064	5.35599e-06	3.00837e-05	3.08095e-07	0.282539	2.18344e-05
	Mud Tank 16	-0.316475	1.39302	-1.46305	0.00469218	2.09083	2.73317	28.6457	0.00120672	5.97046e-06	4.21256e-05	2.84831e-07	0.282498	1.74515e-05
	Mud Tank 17	0.178799	1.27996	-1.47071	0.00413378	2.13306	2.78861	28.9179	0.00120537	5.29015e-06	4.16824e-05	2.90388e-07	0.282538	2.02692e-05
	Mud Tank 18	-0.715024	1.33797	-1.48653	0.00389652	2.09268	2.73602	29.18	0.00126729	5.92724e-06	4.34302e-05	2.83683e-07	0.282514	1.94371e-05
	Mud Tank 19	-0.414829	1.2383	-1.48402	0.00431655	1.99421	2.60732	29.1716	0.00135567	5.96935e-06	4.64721e-05	3.12007e-07	0.28248	2.04496e-05
	Mud Tank 20	-0.766318	1.32261	-1.49775	0.00374812	2.29975	3.0073	29.683	0.00122583	6.47378e-06	4.12973e-05	2.33662e-07	0.28249	1.98042e-05
	Mud Tank 21	-0.475939	1.16759	-1.4987	0.00410961	2.24391	2.93434	29.1001	0.001152	5.15229e-06	3.95874e-05	2.7208e-07	0.282482	1.95174e-05
	Mud Tank 22	0.35419	1.14977	-1.51065	0.00390563	2.20252	2.88045	28.5216	0.00122741	5.03551e-06	4.30344e-05	2.69816e-07	0.282546	1.77056e-05
	Mud Tank 23	-1.19604	1.59046	-1.51362	0.00372508	2.10951	2.75904	29.8607	0.0010096	5.98675e-06	3.38105e-05	2.7204e-07	0.282492	1.91661e-05
	Mud Tank 24	-0.552691	2.30993	-1.51235	0.0044038	2.1804	2.85173	29.905	0.000662774	5.52265e-06	2.21627e-05	2.85306e-07	0.28248	1.76149e-05
	Mud Tank 25	-1.16366	2.61597	-1.51845	0.00446204	2.08894	2.73217	29.5868	0.000637159	5.8885e-06	2.15352e-05	2.74409e-07	0.282496	1.83716e-05
	Mud Tank 26	1.36728	3.79877	-1.55174	0.00430518	1.91945	2.51142	28.1245	0.000453921	5.5229e-06	1.61397e-05	3.09051e-07	0.282519	2.14828e-05
	Mud Tank 27	-0.911271	3.60726	-1.54367	0.00401048	2.00178	2.6191	28.7101	0.00048899	5.60184e-06	1.7032e-05	2.81128e-07	0.282489	1.81795e-05
	Mud Tank 28	0.542604	2.3654	-1.53007	0.00448281	2.09817	2.74467	28.9279	0.000703591	5.45538e-06	2.43223e-05	2.95384e-07	0.282507	1.95147e-05
	Mud Tank 29	-1.30902	3.28541	-1.52657	0.00427635	2.1521	2.81511	29.2982	0.000478983	5.57338e-06	1.63485e-05	2.65232e-07	0.282486	1.77014e-05
	Mud Tank 30	-0.408339	3.23677	-1.52709	0.00410317	2.26121	2.95807	29.0882	0.000501763	4.93817e-06	1.72497e-05	2.4163e-07	0.282474	1.87677e-05
	Mud Tank 31	0.516384	2.49376	-1.52474	0.00395006	2.13825	2.79705	27.9875	0.000560411	4.76923e-06	2.00236e-05	3.28632e-07	0.282512	2e-05
IGGCAS (n=15)	SA01 01	-1.19749	0.153539	-1.55333	0.00458056	1.86617	2.44179	29.5095	0.0122014	1.52363e-05	0.000413472	9.4832e-07	0.282314	2.17387e-05
	SA01 02	-1.25493	0.180435	-1.55458	0.00435378	1.84285	2.41142	28.8455	0.0118438	1.18971e-05	0.000410595	3.59213e-07	0.28232	2.01395e-05
	SA01 03	-1.34294	0.135838	-1.54861	0.00436878	1.67534	2.19199	29.2264	0.0181175	0.000346515	0.000619902	1.13843e-05	0.282287	2.33151e-05
	SA01 04	-1.31939	0.174831	-1.54739	0.00415472	1.68658	2.20669	29.2632	0.0125388	1.12386e-05	0.000428484	3.93682e-07	0.282291	2.34897e-05
	SA01 05	-1.42112	0.0941163	-1.54545	0.00432377	1.64683	2.1547	28.8635	0.0248319	9.98404e-06	0.000860321	4.05512e-07	0.282237	2.06149e-05
	SA01 06	-1.30063	0.167627	-1.53255	0.00461902	1.75634	2.29755	29.257	0.0125078	1.94225e-05	0.000427514	3.83106e-07	0.282285	2.41937e-05
	SA01 07	-1.38942	0.15724	-1.52564	0.00411486	1.85731	2.42951	29.254	0.0124363	1.67734e-05	0.000425113	3.44832e-07	0.282247	2.05677e-05
	SA01 08	-1.33397	0.14784	-1.52373	0.00471729	1.80821	2.36529	29.1604	0.0125246	2.53851e-05	0.000429508	5.77497e-07	0.282282	2.09902e-05
	SA01 09	-1.30363	0.16197	-1.53539	0.00472881	1.90331	2.48992	29.0168	0.0123073	8.31664e-06	0.000424144	3.77176e-07	0.282286	2.07932e-05
	SA01 10	-1.3508	0.155795	-1.52527	0.00486526	1.78295	2.33233	29.1077	0.0122979	8.67894e-06	0.000422495	3.40302e-07	0.28228	1.97104e-05
	SA01 11	-1.27796	0.182637	-1.52634	0.00445529	1.71621	2.24497	29.1993	0.0123693	9.65184e-06	0.000423616	3.90581e-07	0.282323	2.21963e-05
	SA01 12	-1.38451	0.165179	-1.52925	0.0045018	1.68139	2.19944	29.6302	0.0125673	1.45272e-05	0.000424136	3.85395e-07	0.282254	2.4813e-05
	SA01 13	-1.29842	0.173075	-1.51624	0.00470522	1.65571	2.16559	29.5345	0.0125794	1.19552e-05	0.000425922	4.10913e-07	0.282296	2.34349e-05
	SA01 14	-1.27715	0.162637	-1.50781	0.00461919	1.78936	2.34032	29.8735	0.0126734	1.74611e-05	0.000424237	3.58451e-07	0.282295	2.35252e-05
	SA01 15	-1.35546	0.0938325	-1.51378	0.00413651	1.76537	2.3089	28.9207	0.0247083	1.02397e-05	0.000854345	4.10697e-07	0.282276	2.15074e-05
Solution-MC-ICP-MC Results
Sample	175Lu/177Hf	172Yb/177Hf	176Hf/177Hf	1SE
SA02-1	5.22085e-06	4.2335e-06	0.282301	3.62399e-06
SA02-1R	5.23866e-06	4.29012e-06	0.282293	2.87551e-06
SA02-2	4.39148e-06	3.5671e-06	0.282291	2.72381e-06
SA02-2R	6.55758e-06	4.99587e-06	0.282289	4.26213e-06
SA02-3	5.81821e-06	2.72639e-06	0.282276	3.33506e-06
SA02-3R	4.47546e-06	2.95738e-06	0.282286	2.85159e-06
SA02-4	6.71021e-06	5.63179e-06	0.28227	3.18943e-06
SA02-4R1	6.87809e-06	3.83323e-06	0.282272	3.70264e-06
SA02-4R2	3.9385e-06	6.08467e-06	0.282269	3.10552e-06
SA02-5	7.01233e-06	5.14936e-06	0.282287	3.57813e-06
SA02-5R	5.70104e-06	4.86216e-06	0.282286	2.83323e-06
SA02-6	6.81008e-06	8.31577e-06	0.282282	3.78517e-06
SA02-6R	6.02063e-06	5.00571e-06	0.282294	4.27928e-06
SA02-7	5.04098e-06	6.30365e-06	0.282275	2.87728e-06
SA02-7R	4.16223e-06	2.6985e-06	0.282281	2.90911e-06
SA02-8	8.58939e-06	5.4397e-06	0.28228	3.71554e-06
SA02-8R	6.48678e-06	3.0466e-06	0.282281	3.39494e-06
SA02-9	5.92899e-06	4.14021e-06	0.282286	2.99026e-06
SA02-9R	5.71706e-06	5.99341e-06	0.282286	3.29116e-06
SA02-10	5.52421e-06	4.83334e-06	0.282287	3.30657e-06
SA02-10R	7.52816e-06	4.81214e-06	0.282294	3.15859e-06
SA02-11	5.50536e-06	4.99198e-06	0.282298	3.64769e-06
SA02-11R	5.26309e-06	5.14992e-06	0.282298	2.94305e-06
SA02-12	6.428e-06	4.52361e-06	0.282294	3.25473e-06
SA02-12R	6.51077e-06	2.78701e-06	0.282296	2.74178e-06
SA02-13	4.36952e-06	3.72948e-06	0.282289	3.28634e-06
SA02-13R	6.23571e-06	5.69843e-06	0.282293	3.77265e-06
SA02-14	5.3033e-06	5.34923e-06	0.282289	4.01675e-06
SA02-14R	6.25506e-06	6.13926e-06	0.282289	4.3049e-06
SA02-15	4.05945e-06	4.36898e-06	0.282288	2.78307e-06
SA02-15R	4.40785e-06	3.20234e-06	0.282285	3.0912e-06
			0.282287	1.64345e-05
Solution reference: Alfa Hf
Sample (n=23)	175Lu/177Hf	172Yb/177Hf	176Hf/177Hf	1SE
Alfa Hf 01	4.25304e-06	1.92997e-06	0.282198	3.24552e-06
Alfa Hf 02	6.97984e-06	1.28592e-06	0.282195	2.89599e-06
Alfa Hf 03	3.51256e-06	4.18158e-06	0.282204	3.78386e-06
Alfa Hf 04	6.27049e-06	1.61307e-06	0.282218	4.54815e-06
Alfa Hf 05	7.26925e-06	4.70559e-06	0.282193	3.46964e-06
Alfa Hf 06	7.85886e-06	3.25757e-06	0.282202	3.43591e-06
Alfa Hf 07	7.09764e-06	5.53434e-06	0.282198	3.96314e-06
Alfa Hf 08	7.30885e-06	3.83787e-06	0.282202	3.27458e-06
Alfa Hf 09	5.01169e-06	5.3617e-06	0.282203	3.60696e-06
Alfa Hf 10	6.2067e-06	3.73205e-06	0.282205	3.09682e-06
Alfa Hf 11	6.71565e-06	4.64005e-06	0.282196	4.17443e-06
Alfa Hf 12	6.25196e-06	1.49318e-06	0.282197	3.64241e-06
Alfa Hf 13	7.30166e-06	2.59022e-06	0.282201	3.93344e-06
Alfa Hf 14	4.14401e-06	4.67235e-06	0.282203	3.47311e-06
Alfa Hf 15	4.66032e-06	3.33196e-06	0.28219	3.53028e-06
Alfa Hf 16	6.08186e-06	3.14692e-06	0.28219	3.77074e-06
Alfa Hf 17	5.75883e-06	3.96078e-06	0.282189	3.50659e-06
Alfa Hf 18	5.06441e-06	3.33172e-06	0.282193	3.65107e-06
Alfa Hf 19	7.44909e-06	6.55503e-06	0.282192	3.95764e-06
Alfa Hf 20	6.81401e-06	4.33736e-06	0.2822	3.38384e-06
Alfa Hf 21	5.80998e-06	3.51097e-06	0.282197	3.2503e-06
Alfa Hf 22	5.99658e-06	4.7015e-06	0.282202	3.32316e-06
Alfa Hf 23	5.17374e-06	5.2311e-06	0.282196	3.51492e-06
			0.282198	1.27251e-05
